# Supplementary material for: Dipterocarpoidae genomics reveal their demography and adaptations to Asian rainforests
Source: PubMed Central journal article supplement (PMC10891123; doi:10.1038/s41467-024-45836-5), 2024-02-23
Supplement: 41467_2024_45836_MOESM1_ESM.pdf [file 41467_2024_45836_MOESM1_ESM.pdf]

## **Supplemental information**

### **Title:**

Dipterocarpaceae genomics reveal their demography and adaptations to Asian rainforests

### **Author list:**

Rong Wang, Chao-Nan Liu, Simon T Segar, Yu-Ting Jiang, Kai-Jian Zhang, Kai Jiang, Gang Wang, Jing Cai, Lu-Fan Chen, Shan Chen, Jing Cheng, Stephen G Compton, Jun-Yin Deng, Yuan-Yuan Ding, Fang K. Du, Xiao-Di Hu, Xing-Hua Hu, Ling Kang, Dong-Hai Li, Ling Lu, Yuan-Yuan Li, Liang Tang, Xin Tong, Zheng-Shi Wang, Wei-Wei Xu, Yang Yang, Run-Guo Zang, Zhuo-Xin Zu, Yuan-Ye Zhang & Xiao-Yong Chen

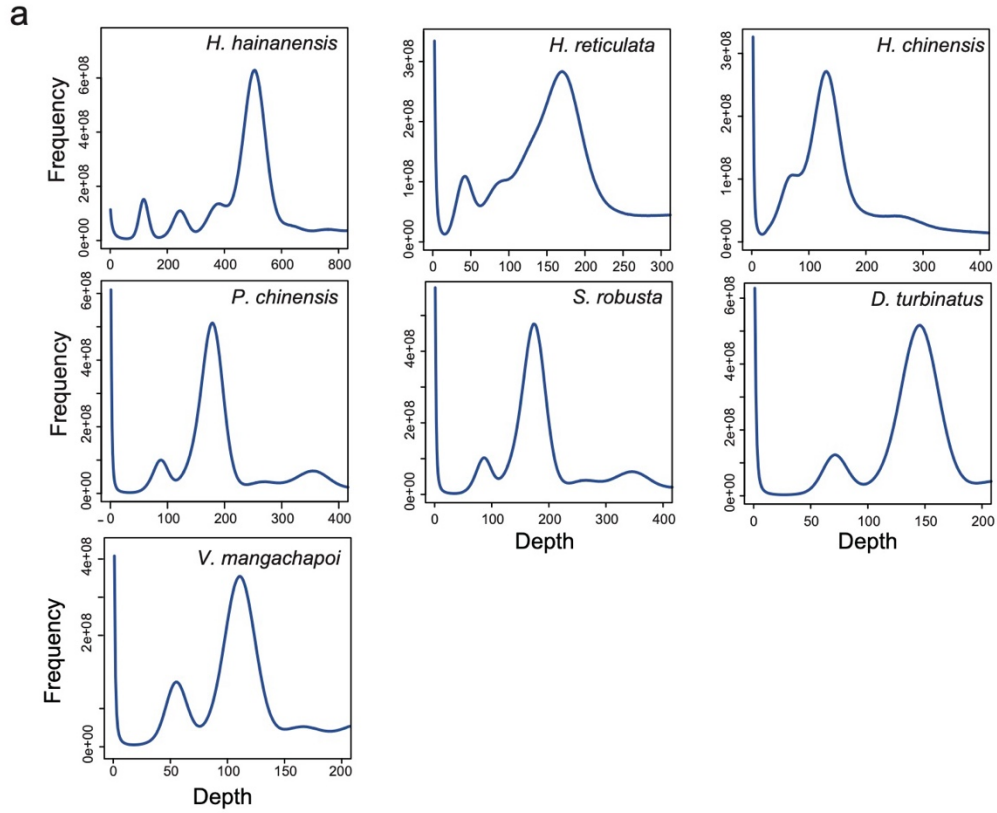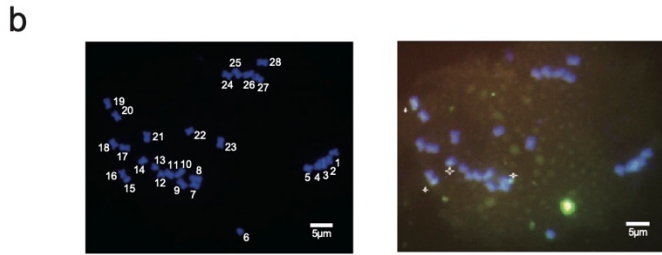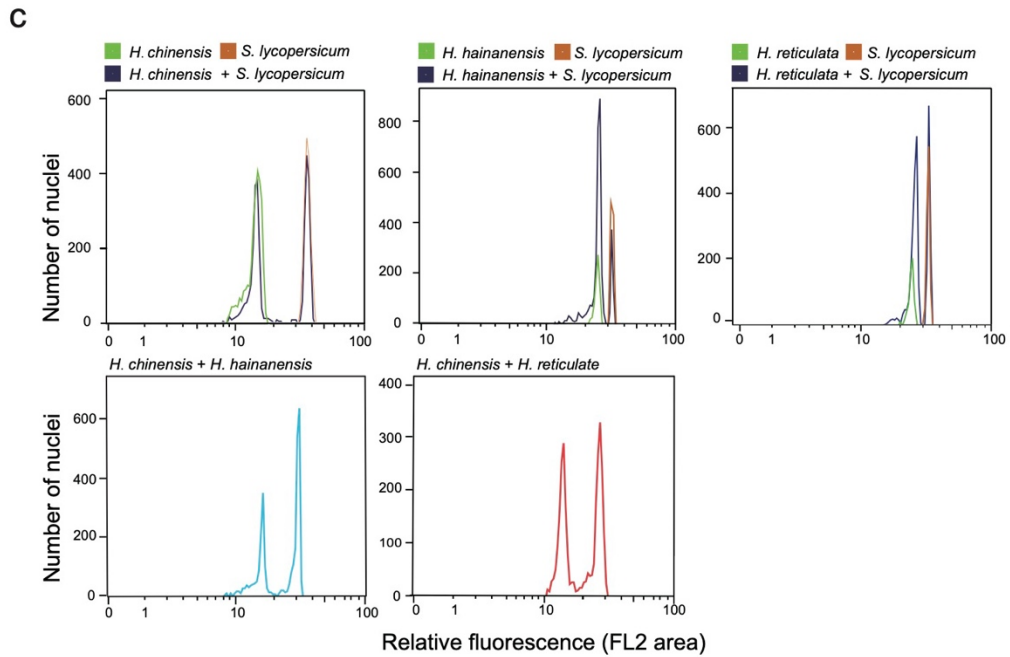



d

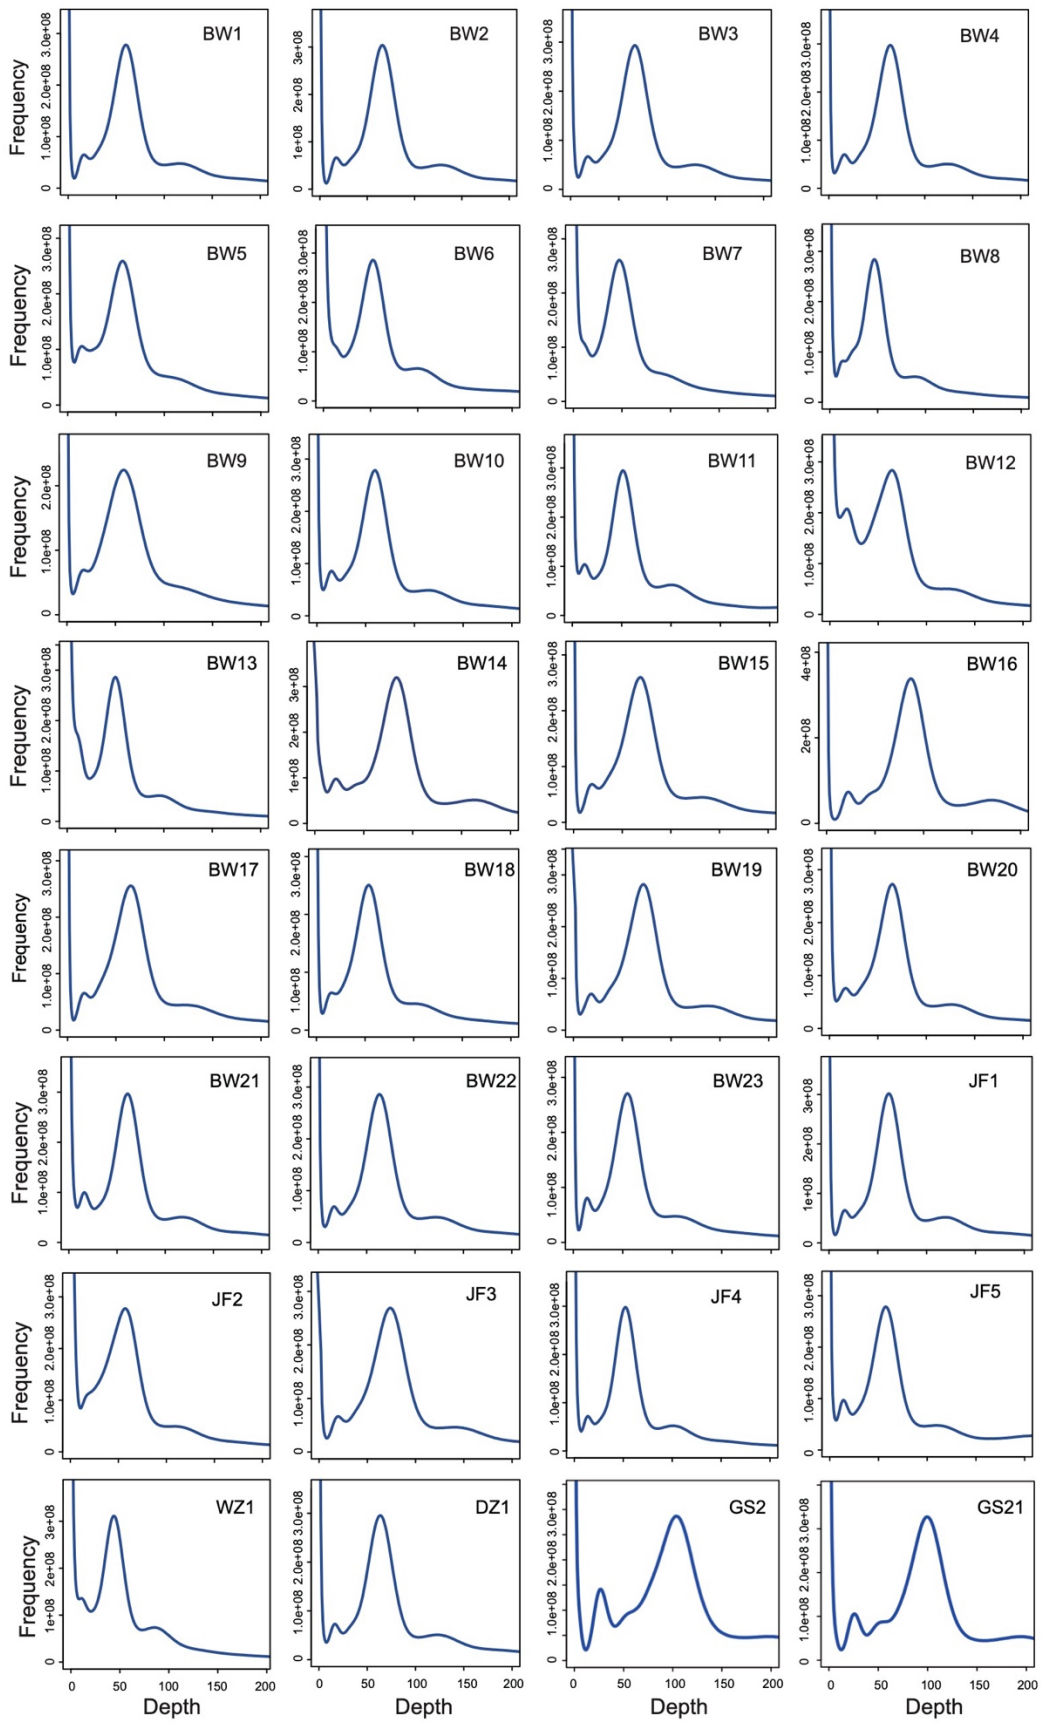

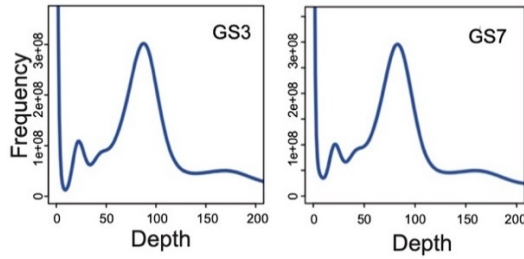

**Supplementary Figure 1. *k*-mer distributions of the 7 Dipteroocarpoideae genomes (a), the results of karyotype analysis of *H. hainanensis* using fluorescence *in situ* hybridization (b), the results of flow cytometry (c), and *k*-mer distributions of all sampled trees of *H. hainanensis* (n=30) and the selected four *H. reticulata* trees (d).** In the *k*-mer analysis, the ploidy of a species is assessed via the ratio of the depth of the leftmost peak to that of the rightmost peak, and the results suggest that *H. hainanensis* and *H. reticulata* are tetraploid species and the other species are diploids. The details of Illumina sequencing data used for the *k*-mer analysis are shown in Supplementary Tables 2 and 16. The chromosome number of *H. hainanensis* was identified as 28, which was four times as the basic chromosome number in genus *Hopea* (n=7)<sup>1</sup>. The green fluorescence signal (highlighted by crosses in Supplementary Fig. 1b) were detected in all the four chromosomes using *in situ* hybridization with the probe of 18SrDNA (this experiment was performed for one time), further confirming that there are four copies of basic chromosomes in *H. hainanensis*, i.e., autotetraploidy. When estimating the genome size for *H. Chinesis*, *H. hainanensis* and *H. reticulata*, we used the genome of *Solanum lycopersicum* (2C = 2.12) as the reference for flow cytometry experiments. When estimating genome size, we ran individual sample for each of the three *Hopea* species (*H. Chinesis*, *H. hainanensis* and *H. reticulata*) and *S. lycopersicum* separately, and ran samples combining each *Hopea* species with *S. lycopersicum* (Supplementary Fig 1c (the upper panel) and Supplementary Table 1). *H. Chinesis* was chosen as the reference diploid species for the estimation of ploidy of *H. hainanensis* and *H. reticulata*. Each treatment of flow cytometry experiments were repeated for three times with similar results.

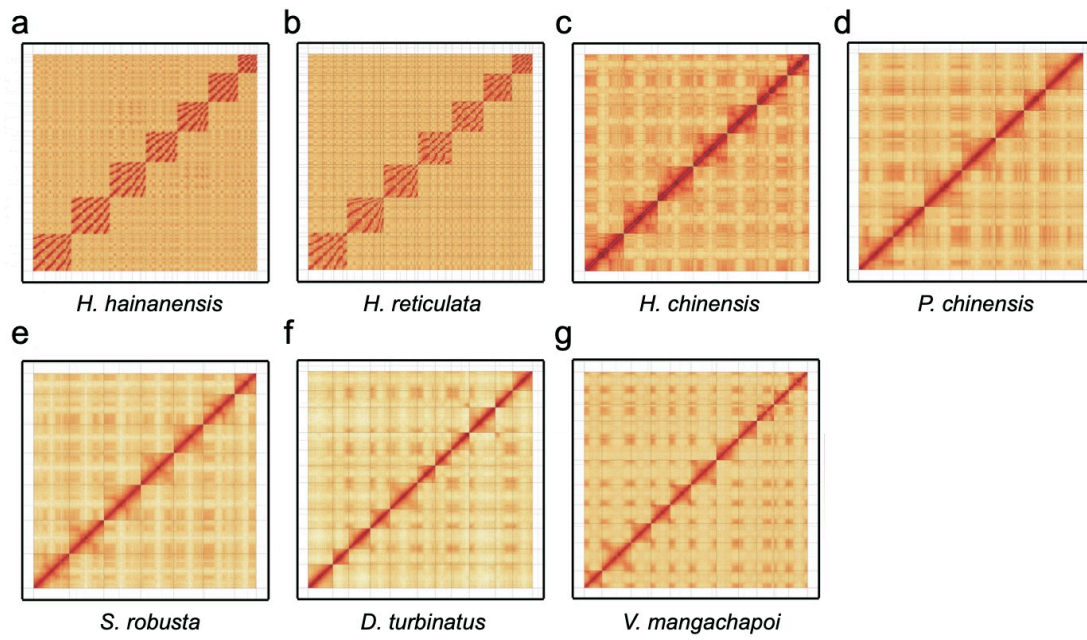

**Supplementary Figure 2. Heat maps of interaction intensity between the pseudo-chromosomes clustered by Hi-C reads for the 7 Dipteroidea species.**

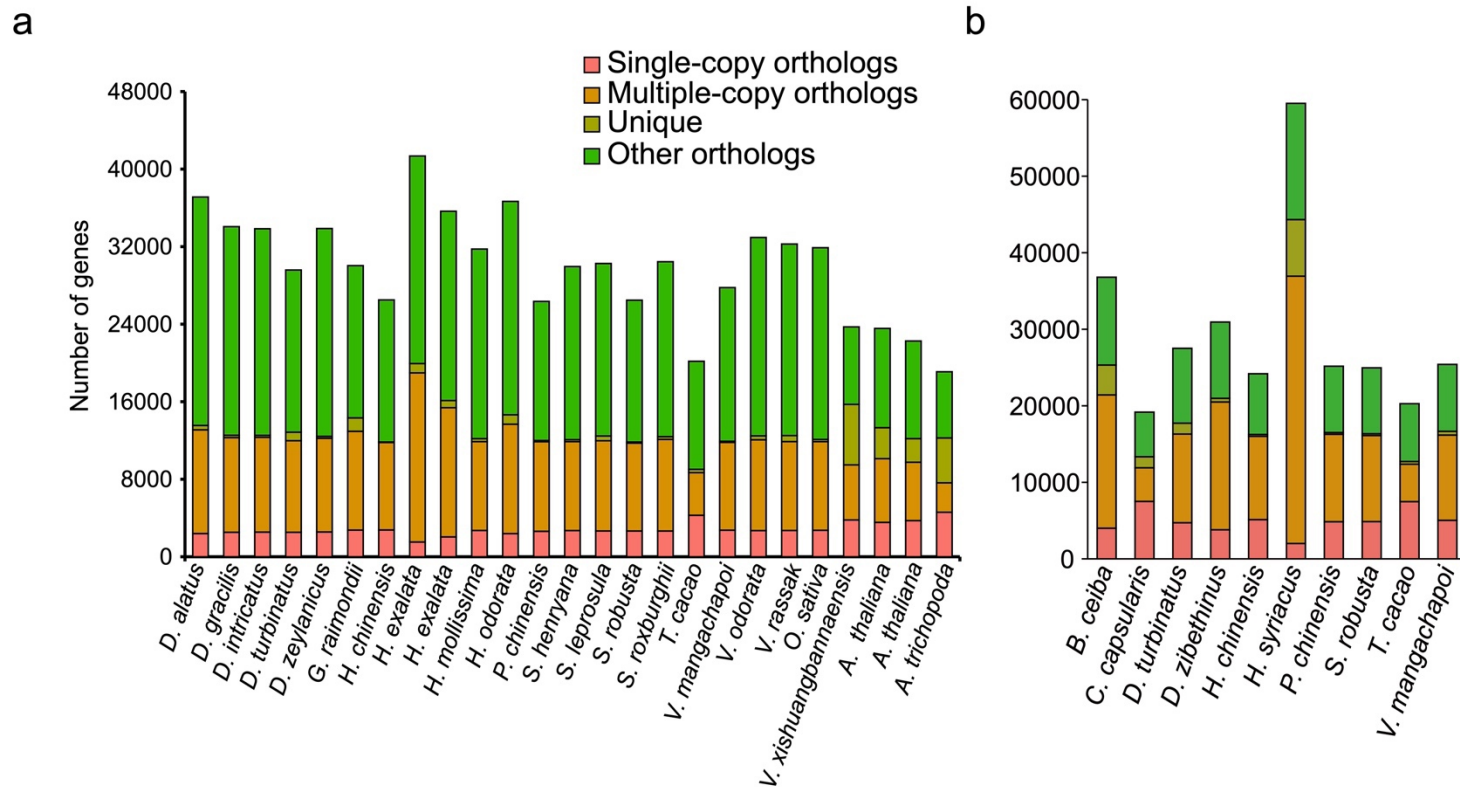

**Supplementary Figure 3. Results of gene family clustering based on the genomes of our focal 7 Dipterocarpoideae species, other 12 Dipterocarpoideae species and four species from other plant taxa (a) and those of the 5 diploid Dipterocarpoideae species and 5 temperate tree species (b).** Full names of each species and the references reported the assembled genomes are listed in Supplementary Table 9. Source data are provided as a Source Data file.

a

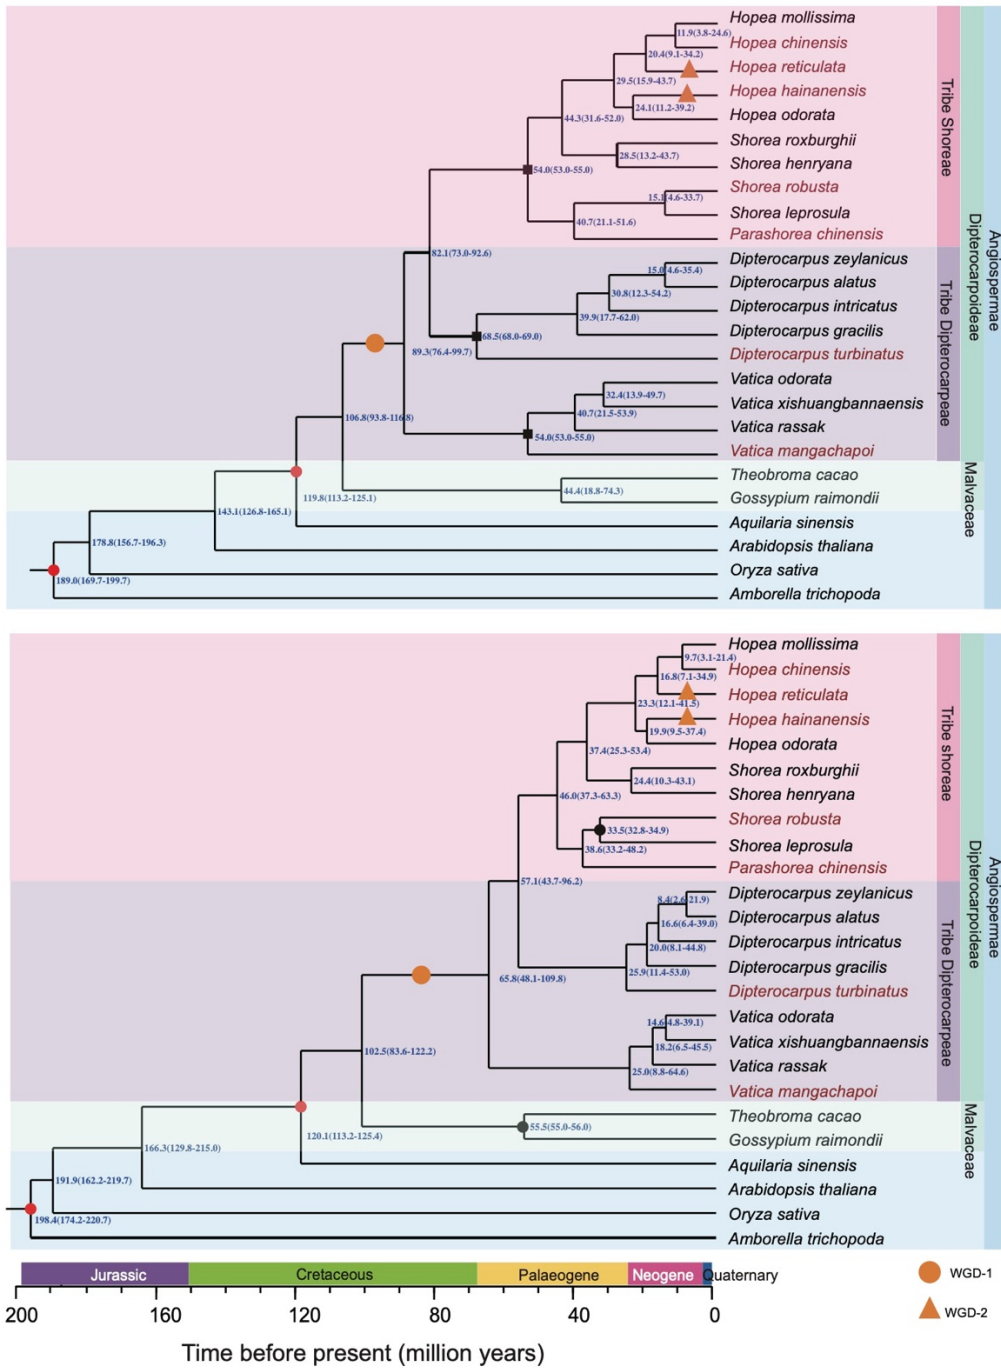

b

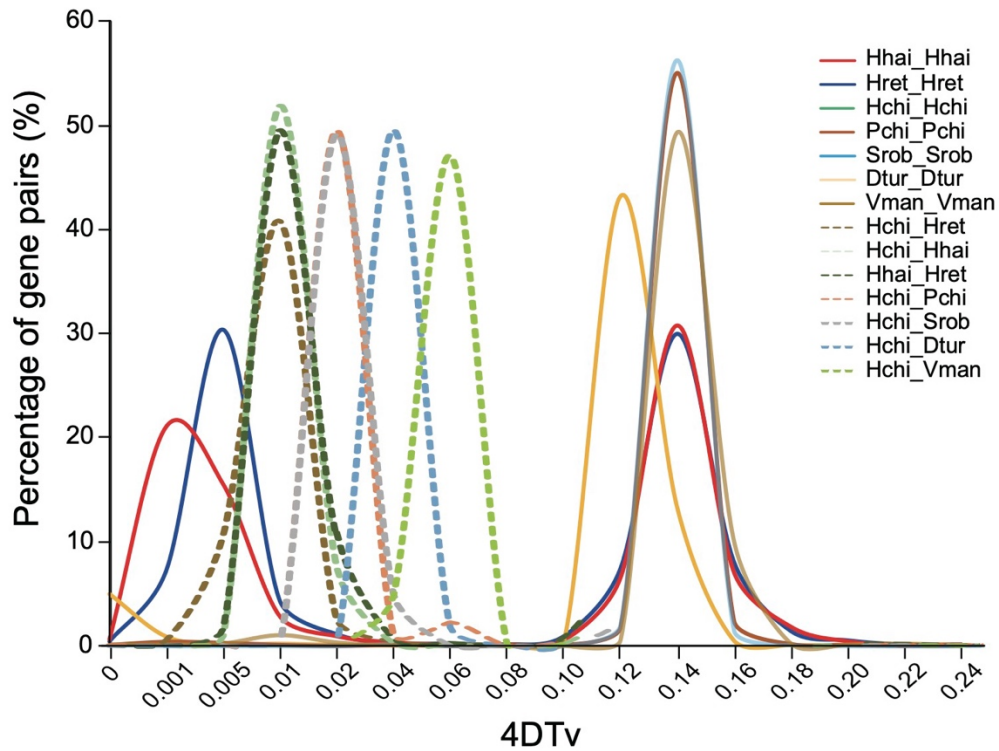

**Supplementary Figure 4. Results of phylogenomic analysis using calibrations from Bell et al.<sup>2</sup> and Vega et al.<sup>3</sup> (red dots), Bansal et al.<sup>4</sup> (black squares) and Ng et al.<sup>5</sup> (black dots) (a), and the distribution of transversion rate of four-fold degenerate sites (4DTv) for homologous genes within each genome and between two genomes (b). The genomes assembled in this study are highlighted by red. Abbreviations of species are shown in Supplementary Table 2.**



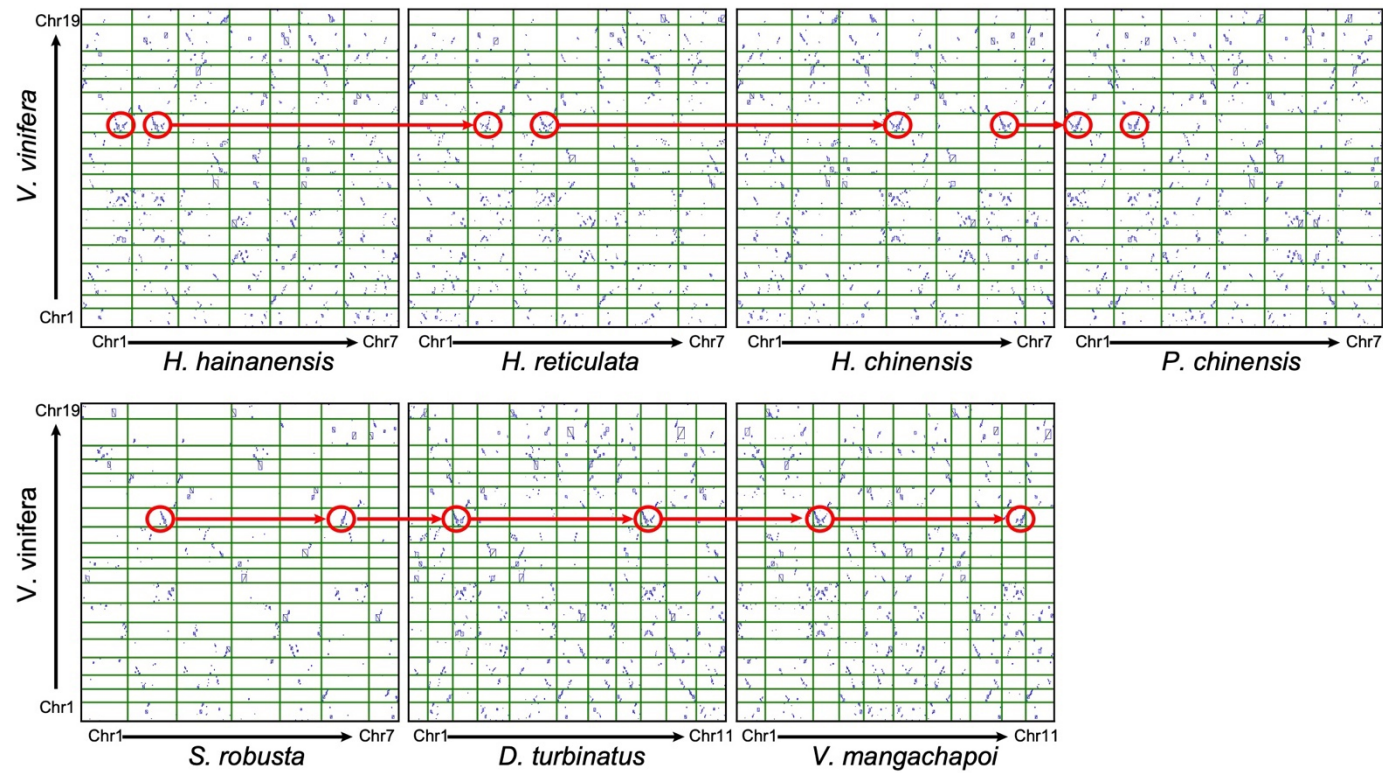

**Supplementary Figure 5. Comparison of the homologous regions between the genome of each focal Dipterocarpoideae species and the genome of *Vitis vinifera*.** Results show that most homologous regions detected in the genome of *Vitis vinifera* are doubled in the genomes of our focal species.

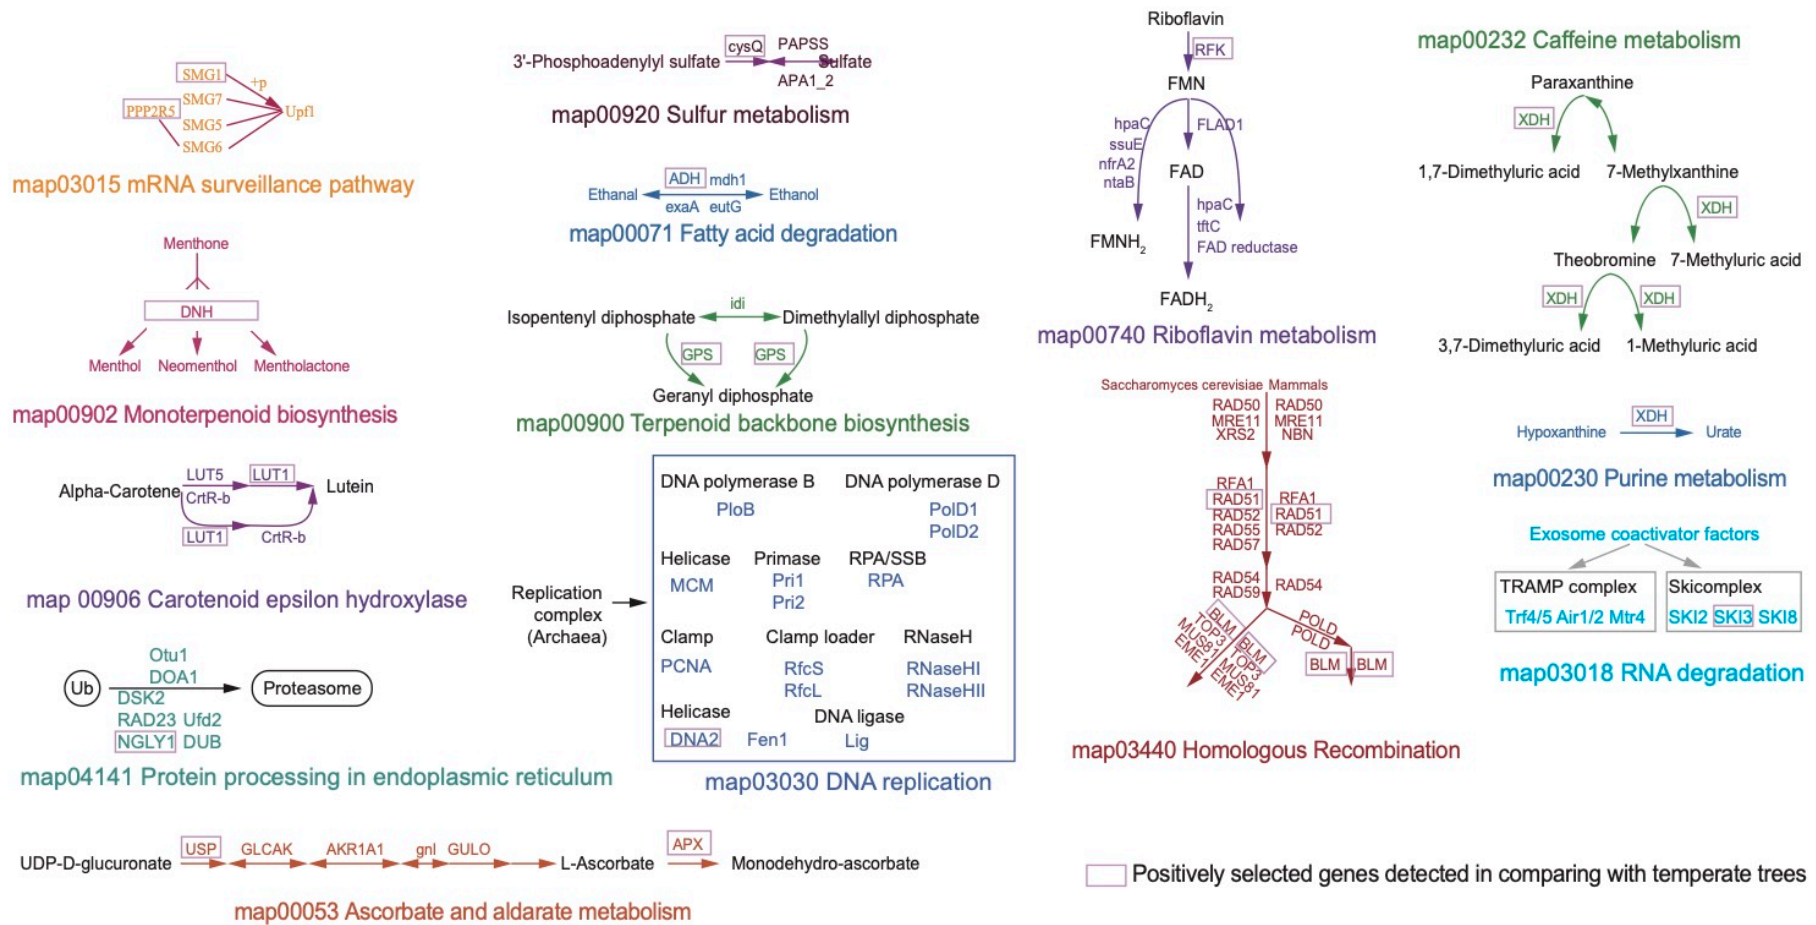

**Supplementary Figure 6. Positively selected genes (16) involved in the KEGG pathways relevant to plants' response to environmental stresses.** Purple frames are used to highlight the positively selected genes supported by the comparison with the genomes of five temperate tree species. The function of each gene is shown in Supplementary Data 2.





RAD51D

|                       |       |   |   |   |   |   |   |   |   |   |   |   |   |   |   |   |   |   |   |   |   |   |   |   |   |   |       |       |   |   |   |   |   |   |   |   |   |   |   |   |   |   |
|-----------------------|-------|---|---|---|---|---|---|---|---|---|---|---|---|---|---|---|---|---|---|---|---|---|---|---|---|---|-------|-------|---|---|---|---|---|---|---|---|---|---|---|---|---|---|
| <i>S. robusta</i>     | ..... | A | S | G | K | A | A | S | F | V | I | P | S | D | S | D | H | K | G | E | P | G | M | K | R | I | V     | ..... |   |   |   |   |   |   |   |   |   |   |   |   |   |   |
| <i>P. chinensis</i>   | ..... | . | . | . | . | . | . | . | . | . | . | . | . | . | . | . | . | . | . | . | . | . | . | . | . | . | .     | ..... |   |   |   |   |   |   |   |   |   |   |   |   |   |   |
| <i>H. chinensis</i>   | ..... | A | S | G | K | A | S | R | F | V | I | P | P | D | S | D | H | K | G | E | P | G | M | K | R | T | V     | ..... |   |   |   |   |   |   |   |   |   |   |   |   |   |   |
| <i>D. turbinatus</i>  | ..... | . | . | . | . | . | . | . | . | . | . | . | . | . | . | . | . | . | . | . | . | . | . | . | . | . | .     | ..... |   |   |   |   |   |   |   |   |   |   |   |   |   |   |
| <i>V. mangachapoi</i> | ..... | A | S | G | K | A | A | R | F | M | I | P | P | D | S | R | . | . | . | . | . | . | . | . | . | . | ..... |       |   |   |   |   |   |   |   |   |   |   |   |   |   |   |
| <i>B. ceiba</i>       | ..... | A | S | G | K | A | A | S | F | V | I | . | . | . | . | . | . | . | . | . | . | . | . | . | . | . | ..... |       |   |   |   |   |   |   |   |   |   |   |   |   |   |   |
| <i>H. syriacus</i>    | ..... | A | S | G | K | A | A | R | F | L | I | . | . | . | . | . | . | . | . | . | . | . | . | . | . | . | ..... |       |   |   |   |   |   |   |   |   |   |   |   |   |   |   |
| <i>D. zibethinus</i>  | ..... | . | . | . | . | . | . | . | . | . | . | . | . | . | . | . | . | . | . | . | . | . | . | . | . | . | ..... |       |   |   |   |   |   |   |   |   |   |   |   |   |   |   |
| <i>T. cacao</i>       | ..... | Y | L | C | P | F | Y | I | R | L | L | G | R | L | Q | G | L | L | F | R | T | C | P | Y | R | F | A     | G     | D | E | K | N | I | E | K | M | E | L | F | H | E | . |
| <i>T. cacao</i>       | ..... | D | . | . | . | . | . | . | . | T | T | A | T | A | I | E | W | A | L | A | E | L | I | N | N | P | A     | V     | L | E | K | A | R | Q | V | M | E | K | V | V | G | N |
| <i>C. capsularis</i>  | ..... | A | S | G | K | A | A | R | F | V | I | . | . | . | . | . | . | . | . | . | . | . | . | . | . | . | .     | ..... |   |   |   |   |   |   |   |   |   |   |   |   |   |   |

|                       |                    |
|-----------------------|--------------------|
| <i>S. robusta</i>     | .....              |
| <i>P. chinensis</i>   | .....              |
| <i>H. chinensis</i>   | .....              |
| <i>D. turbinatus</i>  | .....              |
| <i>V. mangachapoi</i> | .....              |
| <i>B. ceiba</i>       | .....              |
| <i>H. syriacus</i>    | .....              |
| <i>D. zibethinus</i>  | .....              |
| <i>T. cacao</i>       | NRIVQESDTANLPYIQAI |
| <i>C. capsularis</i>  | .....              |



**b** SMC5

|                       |    |    |    |    |    |    |    |   |      |    |     |   |   |   |   |   |   |   |   |   |   |   |   |   |   |   |   |   |   |   |   |   |   |   |   |   |   |   |   |   |   |   |   |   |   |   |   |   |
|-----------------------|----|----|----|----|----|----|----|---|------|----|-----|---|---|---|---|---|---|---|---|---|---|---|---|---|---|---|---|---|---|---|---|---|---|---|---|---|---|---|---|---|---|---|---|---|---|---|---|---|
| <i>S. robusta</i>     | ME | EP | RR | KR | PK | IE | ER | G | ADDY | LP | GNI | T | E | I | E | L | N | N | F | M | T | F | H | H | L | I | C | K | P | G | T | R | L | N | L | V | I | G | P | N | G | S | G | K | S | S | L | V |
| <i>P. chinensis</i>   | ME | EP | RR | KR | PK | IE | ER | G | ADDY | LP | GNI | T | E | I | E | L | N | N | F | M | T | F | H | H | L | I | C | K | P | G | T | R | L | N | L | V | I | G | P | N | G | S | G | K | S | S | L | V |
| <i>H. chinensis</i>   | ME | EP | RP | KR | PK | IE | ER | G | ADDY | LP | GNI | T | E | I | E | L | N | N | F | M | T | F | H | H | L | I | C | K | P | G | T | R | L | N | L | V | I | G | P | N | G | S | G | K | S | S | L | V |
| <i>D. turbinatus</i>  | ME | EP | RP | KR | PK | IE | ER | G | ADDY | LP | GNI | T | E | I | E | L | N | N | F | M | T | F | H | H | L | I | C | K | P | G | T | R | L | N | L | V | I | G | P | N | G | S | G | K | S | S | L | V |
| <i>V. mangachapoi</i> | ME | EP | RV | KR | PK | IS | SR | G | VDDY | LP | GNI | T | E | I | E | L | N | N | F | M | T | F | N | H | L | V | C | K | P | G | P | R | L | N | L | V | I | G | P | N | G | S | G | K | S | S | L | V |
| <i>B. ceiba</i>       | ME | EP | RV | KR | PK | IS | SR | G | VDDY | LP | GNI | T | E | I | E | L | N | N | F | M | T | F | N | H | L | V | C | K | P | G | P | R | L | N | L | V | I | G | P | N | G | S | G | K | S | S | L | V |
| <i>H. syriacus</i>    | ME | EP | RV | KR | PK | IS | SR | G | VDDY | LP | GNI | T | E | I | E | L | N | N | F | M | T | F | N | H | L | V | C | K | P | G | P | R | L | N | L | V | I | G | P | N | G | S | G | K | S | S | L | V |
| <i>D. zibethinus</i>  | ME | EP | RV | KR | PK | IS | SR | G | VDDY | LP | GNI | T | E | I | E | L | N | N | F | M | T | F | N | H | L | V | C | K | P | G | P | R | L | N | L | V | I | G | P | N | G | S | G | K | S | S | L | V |
| <i>T. cacao</i>       | ME | EP | RV | KR | LK | IS | SR | G | VDDY | LP | GNI | T | E | I | E | L | N | N | F | M | T | F | N | H | L | V | C | K | P | G | S | R | L | N | L | V | I | G | P | N | G | S | G | K | S | S | L | V |
| <i>C. capsularis</i>  | ME | EP | RV | KR | PK | IS | SR | G | VDDY | LP | GNI | T | E | I | E | L | N | N | F | M | T | F | N | H | L | V | C | K | P | G | S | R | L | N | L | V | I | G | P | N | G | S | G | K | S | S | L | V |

|                       |    |    |   |   |   |   |   |   |   |   |   |   |   |   |   |   |   |   |   |   |   |   |   |   |   |   |   |   |   |   |   |   |   |   |   |   |   |   |   |   |   |   |   |   |   |   |   |   |   |   |   |   |   |   |   |   |   |   |
|-----------------------|----|----|---|---|---|---|---|---|---|---|---|---|---|---|---|---|---|---|---|---|---|---|---|---|---|---|---|---|---|---|---|---|---|---|---|---|---|---|---|---|---|---|---|---|---|---|---|---|---|---|---|---|---|---|---|---|---|---|
| <i>S. robusta</i>     | CA | IA | L | C | L | G | G | E | P | Q | L | L | G | R | A | T | S | V | G | A | Y | V | K | R | G | E | H | A | G | F | I | K | I | S | L | R | G | H | A | E | G | E | R | I | T | I | M | R | K | I | D | T | Q | N | K | S | E | W |
| <i>P. chinensis</i>   | CA | IA | L | C | L | G | G | E | P | Q | L | L | G | R | A | T | S | V | G | A | Y | V | K | R | G | E | H | A | G | F | I | K | I | S | L | R | G | H | A | E | G | E | R | I | T | I | M | R | K | I | D | T | Q | N | K | S | E | W |
| <i>H. chinensis</i>   | CA | IA | L | C | L | G | G | E | P | Q | L | L | G | R | A | T | S | V | G | A | Y | V | K | R | G | E | H | A | G | F | I | R | I | S | L | R | G | H | A | E | G | E | R | I | T | I | M | R | K | I | D | T | Q | N | K | S | E | W |
| <i>D. turbinatus</i>  | CA | IA | L | C | L | G | G | E | P | Q | L | L | G | R | A | T | S | V | G | A | Y | V | K | R | G | E | H | A | G | F | I | K | I | S | L | R | G | H | A | E | G | E | R | I | T | I | M | R | K | I | D | T | Q | N | K | S | E | W |
| <i>V. mangachapoi</i> | CA | IA | L | C | L | G | G | E | P | Q | L | L | G | R | A | T | S | V | G | A | Y | V | K | R | G | E | H | A | G | F | I | K | I | S | L | R | G | R | A | E | G | E | R | I | T | I | M | R | K | I | D | T | Q | N | K | S | E | W |
| <i>B. ceiba</i>       | CA | IA | L | C | L | G | G | E | P | Q | L | L | G | R | A | T | S | I | G | S | Y | V | K | R | G | E | D | S | G | Y | I | K | I | C | L | R | C | Y | S | K | E | E | E | I | T | I | V | R | K | I | N | H | N | K | S | E | W |   |
| <i>H. syriacus</i>    | CA | IA | L | C | L | G | G | E | P | Q | L | L | G | R | A | T | S | I | G | A | Y | V | K | R | G | E | D | A | G | V | V | K | I | S | L | R | C | Y | T | K | E | E | Q | I | T | I | V | R | K | I | D | I | R | N | K | S | E | W |
| <i>D. zibethinus</i>  | CA | IA | L | C | L | G | G | E | P | Q | L | L | G | R | A | T | N | I | G | A | Y | V | K | R | G | E | S | C | Y | I | K | I | T | L | R | C | Y | T | K | E | E | Q | I | T | I | V | R | K | I | D | I | R | N | K | S | E | W |   |
| <i>T. cacao</i>       | CA | IA | L | C | L | G | G | E | P | Q | L | L | G | R | A | T | N | I | G | A | Y | V | K | R | G | E | S | C | Y | I | K | I | S | L | R | C | Y | T | E | E | Q | S | T | I | V | R | K | I | N | H | N | K | S | E | W |   |   |   |
| <i>C. capsularis</i>  | CA | IA | L | C | L | G | G | E | P | Q | L | L | G | R | A | H | I | G | A | F | V | K | R | G | E | T | A | G | Y | I | K | I | S | L | R | C | Y | T | K | E | E | R | I | T | I | A | R | K | I | D | I | E | N | K | S | E | W |   |

|                       |   |   |   |   |   |   |   |   |   |   |   |   |   |   |   |   |   |   |   |   |   |   |   |   |   |   |   |   |   |   |   |   |   |   |   |   |   |   |   |   |   |   |   |   |   |   |   |   |   |   |   |   |   |   |   |   |   |   |   |   |
|-----------------------|---|---|---|---|---|---|---|---|---|---|---|---|---|---|---|---|---|---|---|---|---|---|---|---|---|---|---|---|---|---|---|---|---|---|---|---|---|---|---|---|---|---|---|---|---|---|---|---|---|---|---|---|---|---|---|---|---|---|---|---|
| <i>S. robusta</i>     | L | Y | N | G | K | V | V | P | K | K | E | V | L | A | V | I | Q | K | F | N | I | Q | V | N | N | L | T | Q | F | L | P | Q | D | R | V | C | E | F | A | K | L | T | P | V | Q | L | L | E | E | T | E | K | A | V | G | D | P | K | L | P |
| <i>P. chinensis</i>   | L | Y | N | G | K | V | V | P | K | K | E | V | L | A | V | I | Q | K | F | N | I | Q | V | N | N | L | T | Q | F | L | P | Q | D | R | V | C | E | F | A | K | L | T | P | V | Q | L | L | E | E | T | E | K | A | V | G | D | P | K | L | P |
| <i>H. chinensis</i>   | L | Y | N | G | K | V | V | P | K | K | E | V | L | A | V | I | Q | K | F | N | I | Q | V | N | N | L | T | Q | F | L | P | Q | D | R | V | C | E | F | A | K | L | T | P | V | Q | L | L | E | E | T | E | K | A | V | G | D | P | K | L | P |
| <i>D. turbinatus</i>  | L | H | N | G | K | V | V | P | K | K | E | V | L | A | V | I | Q | K | F | N | I | Q | V | N | N | L | T | Q | F | L | P | Q | D | R | V | C | E | F | A | K | L | T | P | V | Q | L | L | E | E | T | E | K | A | V | G | D | P | K | L | P |
| <i>V. mangachapoi</i> | L | Y | N | G | K | V | V | S | K | K | E | V | L | A | V | I | Q | K | F | N | I | Q | V | N | N | L | T | Q | F | L | P | Q | D | R | V | C | E | F | A | K | L | T | P | V | Q | L | L | E | E | T | E | K | A | V | G | D | P | K | L | P |
| <i>B. ceiba</i>       | L | Y | N | G | K | S | V | P | K | R | E | I | L | D | V | I | R | K | F | N | I | Q | V | N | N | L | T | Q | F | L | P | Q | D | R | V | C | E | F | A | K | L | T | P | I | Q | L | L | E | E | T | E | K | A | V | G | D | P | O | L | P |
| <i>H. syriacus</i>    | L | Y | N | G | K | S | V | P | K | R | E | I | L | D | V | I | R | K | F | N | I | Q | V | N | N | L | T | Q | F | L | P | Q | D | R | V | C | E | F | A | K | L | T | P | I | Q | L | L | E | E | T | E | K | A | V | G | D | P | O | L | P |
| <i>D. zibethinus</i>  | L | Y | N | G | K | S | V | P | K | R | E | I | L | D | V | I | R | K | F | N | I | Q | V | N | N | L | T | Q | F | L | P | Q | D | R | V | C | E | F | A | K | L | T | P | I | Q | L | L | E | E | T | E | K | A | V | G | D | P | O | L | P |
| <i>T. cacao</i>       | L | Y | N | G | K | S | V | P | K | R | E | I | L | D | V | I | R | K | F | N | I | Q | V | N | N | L | T | Q | F | L | P | Q | D | R | V | C | E | F | A | K | L | T | P | I | Q | L | L | E | E | T | E | K | A | V | G | D | P | O | L | P |
| <i>C. capsularis</i>  | S | Y | N | G | K | S | V | P | K | R | E | I | L | D | V | I | R | K | F | N | I | Q | V | N | N | L | T | Q | F | L | P | Q | D | R | V | C | E | F | A | K | L | T | P | I | Q | L | L | E | E | T | E | K | A | V | G | D | P | O | L | P |

|                       |   |   |   |   |   |   |   |   |   |   |   |   |   |   |   |   |   |   |   |   |   |   |   |   |   |   |   |   |   |   |   |   |   |   |   |   |   |   |   |   |   |   |   |   |   |   |   |   |   |   |   |   |   |   |   |   |   |   |   |
|-----------------------|---|---|---|---|---|---|---|---|---|---|---|---|---|---|---|---|---|---|---|---|---|---|---|---|---|---|---|---|---|---|---|---|---|---|---|---|---|---|---|---|---|---|---|---|---|---|---|---|---|---|---|---|---|---|---|---|---|---|---|
| <i>S. robusta</i>     | V | Q | H | A | L | V | D | K | S | R | E | L | K | K | Y | Q | Q | A | V | E | R | N | G | V | T | L | K | Q | L | D | L | N | A | E | Q | E | K | D | V | E | R | V | R | Q | R | E | E | L | L | A | K | V | E | S | M | K | K | K | K |
| <i>P. chinensis</i>   | V | Q | H | A | L | V | D | K | S | R | E | L | K | K | Y | Q | Q | A | V | E | R | N | G | V | T | L | K | Q | L | D | L | N | A | E | Q | E | K | D | V | E | R | V | R | Q | R | E | E | L | L | A | K | V | E | S | M | K | K | K | K |
| <i>H. chinensis</i>   | V | Q | H | A | L | V | D | K | S | R | E | L | K | K | Y | Q | Q | A | V | E | R | N | G | V | T | L | K | Q | L | D | L | N | A | E | Q | E | K | D | V | E | R | V | R | Q | R | E | E | L | L | A | K | V | E | S | M | K | K | K |   |
| <i>D. turbinatus</i>  | V | Q | H | A | L | V | D | K | S | R | E | L | K | K | Y | Q | Q | A | V | E | R | N | G | V | T | L | K | Q | L | D | L | N | A | E | Q | E | K | D | V | E | R | V | R | Q | R | E | E | L | L | A | K | V | E | S | M | K | K | K |   |
| <i>V. mangachapoi</i> | L | Q | H | A | L | V | D | K | S | R | E | L | K | K | Y | Q | Q | A | V | E | R | N | G | V | T | L | K | Q | L | D | L | N | A | E | Q | E | K | D | V | E | R | V | R | Q | R | E | E | L | L | A | K | V | E | S | M | K | K | K |   |
| <i>B. ceiba</i>       | V | Q | H | C | L | V | E | K | S | R | E | L | K | K | Y | Q | K | A | V | D | T | M | G | E | S | L | K | Q | L | I | A | L | N | A | E | Q | E | K | D | V | E | R | V | R | Q | R | E | L | L | E | K | V | D | S | M | K | K | K |   |
| <i>H. syriacus</i>    | V | Q | H | C | L | V | E | K | S | R | E | L | K | K | Y | Q | K | A | V | D | T | M | G | E | S | L | K | Q | L | I | A | L | N | A | E | Q | E | K | D | V | E | R | V | R | Q | R | E | L | L | E | K | V | D | S | M | K | K | K |   |
| <i>D. zibethinus</i>  | V | Q | H | C | L | V | E | K | S | R | E | L | K | K | Y | Q | K | A | V | D | T | M | G | E | S | L | K | Q | L | I | A | L | N | A | E | Q | E | K | D | V | E | R | V | R | Q | R | E | L | L | E | K | V | D | S | M | K | K | K |   |
| <i>T. cacao</i>       | V | Q | H | C | L | V | E | K | S | R | E | L | K | K | Y | Q | K | A | V | E | T | M | G | E | S | L | K | Q | L | I | A | L | N | A | E | Q | E | K | D | V | E | R | V | R | Q | R | E | L | L | E | K | V | N | Y | M | K | K | K |   |
| <i>C. capsularis</i>  | V | Q | H | S | T | L | I | E | K | S | R | E | L | K | K | Y | Q | K | A | V | E | T | M | G | E | S | L | K | Q | L | V | A | L | N | A | E | L | E | K | D | V | E | R | V | R | Q | R | N | E | L | L | E | K | V | D | Y | M | K |   |



SMC5

*S. robusta* LPEFEHPKDELGRINGQIRELVRVQSNKRLLOKSEMEKLLYQRQLNLRQCIDRLKDMEN  
*P. chinensis* LPEFEHPKDELGRINGQIRELVRVQSNKRLLOKSEMEKLLYQRQSNLRQCIDRLKDMEN  
*H. chinensis* LPEFEHPKDELGRINGQIRELVRVQSNKRLLOKSEMEKLLYQRQLNLRQCIDRLKDMEN  
*D. turbinatus* LPKFEHPKDELGRINGQIRELVRVQSNKRLLOKSEMEKLLYQRQLNLRQCIDRLKDMEN  
*V. mangachapoi* LPAYEPPKAEIERLKSQIVELTSSAHQLMQQKKEKESLGMKKAALRNQVDRKDMEN  
*B. ceiba* LPVYEPPKEEIERLKSQIVELTSSAQMMQKKEKESLGMKKTALRNQVDRKDMEN  
*H. syriacus* LPAYEPPKEEIERLKSQIVELTSSAHQKMQKKEKESLGMKKTALRNQVDRKDMEN  
*D. zibethinus* LPAYEPPKEEIERLKSQIVELTSSAHQKMQKKEKESLGMKKTALRNQVDRKDMEN  
*T. cacao* LPAYEPPKEEIERLKSQIVELTSSAHQKMQKKEKESLGMKKTALRNQVDRKDMEN  
*C. capsularis* LRSYKPPKEEIESLISQIALKETSAREKRRQKEMKEKHLGQLKSAALRNQVNSLTDLENK

*S. robusta* NKRLHALKNSGAEIVQAYQWLQQRHLLNKEVFGPVLLEVNVSDQHANYLEGHVPPFYI  
*P. chinensis* NKRLHALKNSGAEIVQAYQWLQQRHLLNKEVFGPVLLEVNVSDQHANYLEGHVPPFYI  
*H. chinensis* NKRLHALKNSGAEIVQAYQWLQQRHLLNKEVFGPVLLEVNVSDQHANYLEGHVPPFYI  
*D. turbinatus* NKRLHALKNSGAEIVQAYQWLQQRHLLNKEVFGPVLLEVNVSDQHANYLEGHVPPFYI  
*V. mangachapoi* NKRLHALKNSGAEIVQAYQWLQQRHLLNKEVFGPVLLEVNVSDQHANYLEGHVPPFYI  
*B. ceiba* TKLLHALKNSGAEIVQAYQWLQQRHLLNKEVFGPVLLEVNVSDQHANYLEGHVPPFYI  
*H. syriacus* SKCLHALKNSGAEIVQAYQWLQQRHLLNKEVFGPVLLEVNVSDQHANYLEGHVPPFYI  
*D. zibethinus* NKLLHALKNSGAEIVQAYQWLQQRHLLNKEVFGPVLLEVNVSDQHANYLEGHVPPFYI  
*T. cacao* TKLLRALKNSGAEIVQAYQWLQQRHLLNKEVFGPVLLEVNVSDQHANYLEGHVPPFYI  
*C. capsularis* TKLLHALKNSGAEIVQAYQWLQQRHLLNKEVFGPVLLEVNVSDQHANYLEGHVPPFYI

*S. robusta* WKSFITQDDGDRDFVAKNLKPFVFPVLYVVRDGNLQKSRPEVS.EEMRVLGIYTRLDQVF  
*P. chinensis* WKSFITQDDGDRDFVAKNLKPFVFPVLYVVRDGNLQKSRPEVS.EEMRVLGIYTRLDQVF  
*H. chinensis* WKSFITQDDADRDFVAKNLKPFVFPVLYVVRDGNLQKSRPEVS.EEMRVLGIYTRLDQVF  
*D. turbinatus* WKSFITQDDADRDFVAKNLKPFVFPVLYVVRDGNLQKSRPEVS.EEMRVLGIYTRLDQVF  
*V. mangachapoi* WKSFITQDDGDRDFVAKNLKPFVFPVLYVVRDGNLQKSRPEVS.EEMRVLGIYTRLDQVF  
*B. ceiba* WRSFITQDDGDRDFVAKNLKPFVFPVLYVVRDGNLQKSRPEVS.EEMRVLGIYTRLDQVF  
*H. syriacus* WKSFITQDDGDRDFVAKNLKPFVFPVLYVVRDGNLQKSRPEVS.EEMRVLGIYTRLDQVF  
*D. zibethinus* WRSFITQDDGDRDFVAKNLKPFVFPVLYVVRDGNLQKSRPEVS.EEMRVLGIYTRLDQVF  
*T. cacao* WKSFITQDDGDRDFVAKNLKPFVFPVLYVVRDGNLQKSRPEVS.EEMRVLGIYTRLDQVF  
*C. capsularis* WKSFITQDDSRDRDFVAKNLKPFVFPVLYVVRDGNLQKSRPEVS.EEMRVLGIYTRLDQVF

*S. robusta* DAPDVVKEVLTSQFGLDNS.....YIGTKETDKKADDVKE.LGISDLWTFPNHYRW  
*P. chinensis* DAPDVVKEVLTSQFGLDNS.....YIGTKETDKKADDVKE.LGISDLWTFPNHYRW  
*H. chinensis* DAPDVVKEALTSQFGLDNS.....YIGTKETDKKADDVKE.LGISDLWTFPNHYRW  
*D. turbinatus* DAPDVVKEVLTSQFGLDNS.....YIGTKETDKKADDVKE.LGISDLWTFPNHYRW  
*V. mangachapoi* DAPDVVKEVLTSQFGLDNS.....YIGTKETDKKADDVKE.LGISDLWTFPNHYRW  
*B. ceiba* DAPTAVKEVLTSQFGLDNS.....YIGTKETDKKADDVKE.LGISDLWTFPNHYRW  
*H. syriacus* DAPTAVKEVLTSQFGLDNS.....YIGTKETDKKADDVKE.LGISDLWTFPNHYRW  
*D. zibethinus* DAPTAVKEVLTSQFGLDNS.....YIGTKETDKKADDVKE.LGISDLWTFPNHYRW  
*T. cacao* DAPTAVKEVLTSQFGLDNS.....YIGTKETDKKADDVKE.LGISDLWTFPNHYRW  
*C. capsularis* DAPTAVKEVLTSQFGLDNS.....YIGTKETDKKADDVKE.LGISDLWTFPNHYRW

*S. robusta* VCSRY.DNHVSARVEAVDRSRLLFGLDGGETEKLRSRRTSELEKSIITDIQQELKSLQTEQ  
*P. chinensis* VCSRY.DNHVSARVEAVDRSRLLFGLDGGETEKLRSRRTSELEKSIITDIQQELKSLQTEQ  
*H. chinensis* VRSRY.DNHVSARVEAVDRSRLLFGLDGGETEKLRSRRTSELEKSIITDIQQELKSLQTEQ  
*D. turbinatus* VCSRY.DKHVSARVEAVDRSRLLFGLDGGETEKLRSRRTSELEKSIITDIQQELKSLQTEQ  
*V. mangachapoi* VCSRY.DNHVSARVEAVDRSRLLFGLDGGETEKLRSRRTSELEKSIITDIQQELKSLQTEQ  
*B. ceiba* SVSRYGDNEMSAQVEPVHDSRLLLCGLDGGETEKLRSRRTSELEKSIITDIQQELKSLQTEQ  
*H. syriacus* SVSRYGDNEMSAQVEPVHDSRLLLCGLDGGETEKLRSRRTSELEKSIITDIQQELKSLQTEQ  
*D. zibethinus* SVSRYGDNEMSAQVEPVHDSRLLLCGLDGGETEKLRSRRTSELEKSIITDIQQELKSLQTEQ  
*T. cacao* SVSRY.DNHISGTVESVDRSRLLFGLDGGETEKLRSRRTSELEKSIITDIQQELKSLQTEQ  
*C. capsularis* SVSRYDNNAI SATVEPVHDSRLLLCGLDGGETEKLRSRRTSELEKSIITDIQQELKSLQTEQ

*S. robusta* RILEDEAAQLQKQEEIVNTVRNEKRRKQELNRIEQRKRKVESLEKEDDLDTVMAKLVLD  
*P. chinensis* RILEDEAAQLQKQEEIVNTVRNEKRRKQELNRIEQRKRKVESLEKEDDLDTVMAKLVLD  
*H. chinensis* RILEDEAAKQLQKQEEIVNTVRNEKRRKQELNRIEQRKRKVESLEKEDDLDTVMAKLVLD  
*D. turbinatus* RILEDEAAQLQKQEEIVNTVRNEKRRKQELNRIEQRKRKVESLEKEDDLDTVMAKLVLD  
*V. mangachapoi* RILEDEAAQLQKQEEIVNTVRNEKRRKQELNRIEQRKRKVESLEKEDDLDTVMAKLVLD  
*B. ceiba* RVAEDEAAKQLQKQREEMVNTGRRMCKRKELESCEVEQRKRKLVSELEKGGVETAMAKLID  
*H. syriacus* RLVEDEAAKQLQKQREEMVNTGRRMCKRKELESCEVEQRKRKLVSELEKGGVETAMAKLID  
*D. zibethinus* RLVEDEAAKQLQKQREEMVNTGRRMCKRKELESCEVEQRKRKLVSELEKGGVETAMAKLID  
*T. cacao* RLVEDEAAKQLQKQREEMVNTGRRMCKRKELESCEVEQRKRKLVSELEKGGVETAMAKLID  
*C. capsularis* RQLEDESAKIEKQREDMVLTSRRMIQKQKNMENYVAQLKSTL.SLEESDLETAVAKLID



SMC5

*S. robusta* QVARRHNTNRRFEDMIKIKDILLVDAVSLKWNLAENKLVSTIYDAKIRELEANFKHQEKFAQQ  
*P. chinensis* QVARRHNSNRRFEDMIKIKDILLVDAVSLKWNLAENKLVSTIYDAKIRELEANLKHQEKFAQQ  
*H. chinensis* QVARRHNTNRRFEDMIKIKDILLVDAVSLKWNLAENKLVSTIYDAKIRELEANLKHQEKFAQQ  
*D. turbinatus* QVARRHNTSQFEDVIKIKDILLVDAVSLKWNLAENKLVSTIYDAKIRELEANLKHQEKFAQQ  
*V. mangachapoi* QVARRHNTNRRFEDVIKIKDILLVDAVSLKWNLAENKLVSTIYDAKIRELEANLKHQEKFAQQ  
*B. ceiba* QATRSNVERFKHAIKIKDILLVEAVSCKWVFAEKHMVSTIYDAKIRDSEANLKEHEKFAHQ  
*H. syriacus* QATRSNVERFKHAIKIKDILLVEAVSCKWVFAEKHMVSTIYDAKIRDSEANLKEHEKFAHQ  
*D. zibethinus* QATRSNVERFKHAIKIKDILLVEAVSCKWVFAEKHMVSTIYDAKIRDSEANLKEHEKFAHQ  
*T. cacao* QATRSNVERFKHAIKIKDILLVEAVSCKWVFAEKHMVSTIYDAKIRDSEANLKEHEKFAHQ  
*C. capsularis* RAKRISNVERFNHAIKIKDILLVEAVAWKWSFAEKHMVSTIYDAKIRDSEANLKEHEKFAHQ

*S. robusta* ALQQFEYCKKEVEDCRQOLYAAKTSAESIAVITPELEKAFLEMPPTTIEELEAAIEDNISQ  
*P. chinensis* ALQQFEYCKKEVEDCRQOLSAAKTSAESIAVITPELEKAFLEMPPTTIEELEAAIEDNISQ  
*H. chinensis* ALQQLEFYCKKEVEDCRQOLSAAKRSAESIAVITPELEKAFLEMPPTTIEELEAAIEDNISQ  
*D. turbinatus* ALQQLEFYCKKEVEDCRQOLSAAKRSAESIAVITSELEKAFLEMPPTTIEELEAAIEDNISQ  
*V. mangachapoi* ALQQFEYCKKEVEDCRQOLSAAKRSAESIAVITPELEKAFLEMPPTTIEELEAAIEDNISQ  
*B. ceiba* ASLDLQICEKNVEDHSQOLLAAKRHAESIAVITPELEKAFLEMPPTTIEELEAAIEDNISQ  
*H. syriacus* ASMNLEICQEVKDYRQOLSAAKRSAESIAVITPELEKAFLEMPPTTIEELEAAIEDNISQ  
*D. zibethinus* ASLNLQFCENDVKGYSQOLSAAKRSAESIAVITPELEKAFLEMPPTTIEELEAAIEDNISQ  
*T. cacao* ASLHLEFYCKKEVEDCRQOLSAAKRSAESIAVITPELEKAFLEMPPTTIEELEAAIEDNISQ  
*C. capsularis* ASLDLQCKKEDVEDYLOOLSAAKRSAESIAVITPELEKAFLEMPPTTIEELEAAIEDNISQ

*S. robusta* ANSILFLN.QNILQEYEHRRQHRIEDISTKLEADKKELEERCLAETNALKESWLPTLRNLVA  
*P. chinensis* ANSILFLN.QNILQEYEHRRQHRIEDISTKLEADKKELEERCLAETNALKESWLPTLRNLVA  
*H. chinensis* ANSILFLN.QNILQEYEHRRQHRIEDVSTKLEADKKELEERCWAEINALKESWLPTLRNLVA  
*D. turbinatus* ANSILFLN.QNILQEYEHRRQHRIEISTKLEADKKELEERCLTEMNALKESWLPTLRNLVA  
*V. mangachapoi* ANSILFLN.QNILQEYEHRRQHRIEDISTKLEADKKELEERCLAETNALKESWLPTLRNLVA  
*B. ceiba* ANSIVFLN.RNILQEYEDRRHQIEAISAKLDADNKELEORCLAEIDALKNWLPKLRNLVS  
*H. syriacus* ANSIVFLN.QNILQEYQDRERQIEAISAKLDADNKELEORCLAEIDALKNWLPKLRNLVS  
*D. zibethinus* ANSIVFLN.RNILQEYEDRRHQIEAISAKLDADNKELEORCLAEIDALKNWLPKLRNLVS  
*T. cacao* ANSIVFLN.RNILQEYEDRRHQIEAISAKLDADNKELEORCLAEIDALKNWLPKLRNLVS  
*C. capsularis* ANSIFCLNGNNILLEYEDRRQIEAISAKLEADNKELEORCLAEIDALKNWLPKLRNLVN

*S. robusta* QINETFSHKFFQEMAVAGEVLLD.....  
*P. chinensis* QINETFSRKKFFQEMAVAGEVLLD.....  
*H. chinensis* QINETFSHKFFQEMAVAGEVLLGITM.....  
*D. turbinatus* QINETFSRKKFFQEMAVAGEVLLD.....  
*V. mangachapoi* QINETFSRKKFFQEMAVAGEVLLD.....  
*B. ceiba* QINETFSRNFQEMAVAGEVSLD.....  
*H. syriacus* QINETFSRNFQEMAVAGEVSLD.....  
*D. zibethinus* QINETFSRNFQEMAVAGEVSLD.....  
*T. cacao* QINETFSRNFQEMAVAGEVSLD.....  
*C. capsularis* QINETFSRNFQEMAVAGEVSLD.....

*S. robusta* .....EHGTDFFDQFGILIKVKFR.....  
*P. chinensis* .....EHGTDFFDQFGILIKVKFR.....  
*H. chinensis* .....NMELIFDQFGILIKVKFR.....  
*D. turbinatus* .....EHGTDFFDQFGILIKVKFR.....  
*V. mangachapoi* .....ERGSDFDQFGILIKVKFR.....  
*B. ceiba* .....EHDTFDQFGILIKVKFR.....  
*H. syriacus* .....EHDNDFDQFGILIKVKFR.....  
*D. zibethinus* .....EHDMDFDQFGVLIKVKFR.....  
*T. cacao* .....EHDTFDQFGILIKVKFR.....  
*C. capsularis* .....EHDADFQFGIFIKVKFR.....

*S. robusta* .....QSGQLQVLSAHHQSGGERSVSTILYLVSLQDLTNCPFRVVEINQG  
*P. chinensis* .....QSGQLQVLSAHHQSGGERSVSTILYLVSLQDLTNCPFRVVEINQG  
*H. chinensis* .....QSGQLQVLSAHHQSGGERSVSTILYLVSLQDLTNCPFRVVEINQG  
*D. turbinatus* .....QSGQLQVLSAHHQSGGERSVSTILYLVSLQDLTNCPFRVVEINQG  
*V. mangachapoi* .....QSGQLQVLSAHHQSGGERSVSTILYLVSLQDLTNCPFRVVEINQG  
*B. ceiba* .....QAGQLQVLSAHHQSGGERSVSTILYLVSLQDLTNCPFRVVEINQG  
*H. syriacus* .....QAGQLQVLSAHHQSGGERSVSTILYLVSLQDLTNCPFRVVEINQG  
*D. zibethinus* .....QAGQLQVLSAHHQSGGERSVSTILYLVSLQDLTNCPFRVVEINQG  
*T. cacao* .....QTGQLQVLSAHHQSGGERSVSTILYLVSLQDLTNCPFRVVEINQG  
*C. capsularis* .....QAGQLQVLSAHHQSGGERSVSTILYLVSLQDLTNCPFRVVEINQG





C LUT1

|                       |                                                              |
|-----------------------|--------------------------------------------------------------|
| <i>S. robusta</i>     | MRSSSLIS.SFSFPTAPPRRSAT.....SLHS.....LSVKSSVEKTF.TTKTQ..     |
| <i>P. chinensis</i>   | MQSSLLIS.SFSFPTAPPPHRSAT.....SLHS.....LSIKSSVEKTF.TNKKPQ..   |
| <i>H. chinensis</i>   | MQSSLLIS.SFSFPTAPPPRRFST.....SLHS.....LSIKSSVEKTF.NTKPQ..    |
| <i>D. turbinatus</i>  | MQSSLSIS.SFSFPTAPPPRSATS.....LHS.....LSVKSSVDKIK....PQ..     |
| <i>V. mangachapoi</i> | MQSSFSIS.SFSFPAAPPPRTS.....LRS.....LSIKSSVEKTS.TTKSQ..       |
| <i>B. pendula</i>     | MQSCVNLSPRPLSFISLPCQKPINP.....LP LQS.....FSVKSSVDKTP.TSKPKHL |
| <i>O. rehderiana</i>  | MQSCLTPSSLSFLVSIPPRKPIN.....P LQP.....FSIKSSVDKTP.TTKPK..    |
| <i>Q. robur</i>       | MQSCVTLG.SLSFLSLPSQRPPNN.....IPLQS.....FSVKSYIGKTP.TAKRK..   |
| <i>F. sylvatica</i>   | MRSVCVAFS.SITFPSLPPRRLTIN.....IPLQS.....FSVKSSIEKTF.TTKPK..  |
| <i>F. excelsior</i>   | MKSCVTL.SLSFSLPQRATIN.....IPLQS.....FSIKSSIEKTF.STKPK..      |

|                       |                                                                 |
|-----------------------|-----------------------------------------------------------------|
| <i>S. robusta</i>     | .PTNASPRKPA SWVSPNWLTSLSRSL.TVGRGDDSGIPIASAE.LDDVSDLLGGALFLPLF  |
| <i>P. chinensis</i>   | .PTNASFPKPA SWVSPNWLTSLSRSL.TIGRGDDSGIPLASAE.LDDVSDLLGGALFLPLF  |
| <i>H. chinensis</i>   | .PTNATPKPA SWVSPNWLTSLSRSL.TVGRGDDSGIPIASAE.LDDVSDLLGGALFLPLF   |
| <i>D. turbinatus</i>  | .PTNATTRKPA SWVSPNWLTSLSRSL.TVGRGDDSGIPIASAKLDDVSDLLGGALFLPLF   |
| <i>V. mangachapoi</i> | .PTNATTPKPA SWVSPNWLTSLSRSL.TIGRGDDSGIPIASAO.LDDVSDLLGGALFLPLF  |
| <i>B. pendula</i>     | ATSATPSK KAT SWVSPNWLTSLSRSL.TIGSNDDSGIPIASAO.LDDVSDLLGGALFLPLF |
| <i>O. rehderiana</i>  | .PAP.APSKTT SWVSPNWLTSLSRSL.TIGANDDSGIPVANA.O.LDDVSDLLGGALFLPLF |
| <i>Q. robur</i>       | .PT..IPS KPN SWVSPNWLTSLSRSL.TIGFNDDSGIPIASAO.LDDVSDLLGGALFLPLF |
| <i>F. sylvatica</i>   | .PT..SPSKST SWVSPNWLTSLSRSL.TIGSNDDSRIPIASAO.LDDVSDLLGGALFLPLF  |
| <i>F. excelsior</i>   | .PA..SPSNST SWVSPNWLTSLSRSL.TIGSNDDSGIPIASAO.LDDVSDLLGGALFLPLF  |

|                       |                                                       |
|-----------------------|-------------------------------------------------------|
| <i>S. robusta</i>     | FLQHLNFELLPDQNISMTTGATIHTTNGLFMKLSQRQSNLTFASSTSR..... |
| <i>P. chinensis</i>   | FLQHLNFELLPDQNISMTTGATIHTTNGLFMKLSQRQSNLAFASSTSR..... |
| <i>H. chinensis</i>   | FLQHLNFELVPDQNISMTTGATIHTTNGLFMKLSQRQSNLAFASSTSR..... |
| <i>D. turbinatus</i>  | FLQHLNFELVPDQNISMTTGATIHTTNGLFMKFSQRQSNLAFASSTSR..... |
| <i>V. mangachapoi</i> | FLQHLNFELVPDQNISMTTGATIHTTNGLFMKLSQRQSNLAFASSTSR..... |
| <i>B. pendula</i>     | FLQHLNFELVPDQNISMTTGATIHTTNGLFMKLSERRPDIS..SPTSK..... |
| <i>O. rehderiana</i>  | FLQHLNFELVPDQNI RFVHEA.....QPTPK.....                 |
| <i>Q. robur</i>       | FLQHLNFELVPDQNISMTTGATIHTTNGLFMKLSERKPNFAFSSSTSK..... |
| <i>F. sylvatica</i>   | FLQHLNFELVPDQDISMTTGATIHTTNGLYMKLSERRSKFDISSPTSK..... |
| <i>F. excelsior</i>   | FLQHLNFELVPDQNISMTTGATIHTTNGLYMKLSERKSNFDNSPTPSK..... |

|                       |                                                               |
|-----------------------|---------------------------------------------------------------|
| <i>S. robusta</i>     | GS LW.....TVRRKAVVPSLHKKRYLSVMVDRVFCKCADRLVEKLVQPF            |
| <i>P. chinensis</i>   | GS LW.....TVRRKAVVPSLHKKRYLSVMVDRVFCKCADRLVEKLVQPF            |
| <i>H. chinensis</i>   | GS LW.....TVRRKAVVPSLHKKRYLSVMVDRVFCKCADRLVEKLVQPF            |
| <i>D. turbinatus</i>  | GS LW.....TVRRKAVVPSLHKKRYLSVMVDRVFCKCAERLVEKLVQPF            |
| <i>V. mangachapoi</i> | GS LW.....TVRRKAVVPSLHKKRYLSVMVDRVFCKCAERLVEKLVQAL            |
| <i>B. pendula</i>     | GS LW.....TVRRKAVVPSLHKKRYLSVMVDRVFCKCAERLVEKLVQPF            |
| <i>O. rehderiana</i>  | GS LW.....TVRRKAVVPSLHKKRYLSVMVDRVFCKCAERLVEKLVQPF            |
| <i>Q. robur</i>       | GS LW.....TVRRKAVVPSLHKKRYLSVMVDRVFCKCAERLVEKLVQPF            |
| <i>F. sylvatica</i>   | GS LW.....TVRRKAVVPSLHKKRYLSVMVDRVFCKCAERLVQKLVQPF            |
| <i>F. excelsior</i>   | GIVFR IETPCRLIAGPISFVKLVRRKAVVPSLHKKRYLSVMVDRVFCKCAERLVONLQPF |

|                       |                                                                  |
|-----------------------|------------------------------------------------------------------|
| <i>S. robusta</i>     | ALNGNAVNLEEKFSQLTLDVIGLALFNYNFDSLTA DSPVIDAVYTALKEAELRSTDI LPY   |
| <i>P. chinensis</i>   | ALNGNAVNMEENFSQLTLDVIGLALFNYNFDSLTA DSPVIDAVYTALKEAELRSTDI LPY   |
| <i>H. chinensis</i>   | ALNGNAVNMEEEKFSQLTLDVIGLALFNYNFDSLTA DSPVIDAVYTALKEAELRSTDI LPY  |
| <i>D. turbinatus</i>  | ALNGNAVNMEEEKFSQLTLDVIGLALFNYNFDSLTA DSPVIDAVYTALKEAELRSTDI LPY  |
| <i>V. mangachapoi</i> | ALNGSAVNMEEEKFSQLTLDVIGLALFNYNFDSLTA DSPVIDAVYTALKEAELRSTDI LPY  |
| <i>B. pendula</i>     | ALDGTAVNMEEEKFSQLTLDVIGLSIFNYNFDSLTS DSPVIEA IYTALKEAELRSTDI LPY |
| <i>O. rehderiana</i>  | ALDGTAVNMEEEKFSQLTLDVIGLSIFNYNFDSLTS DSPVIDAVYTALKEAELRSTDI LPY  |
| <i>Q. robur</i>       | ALDGTAVNMEEEKFSQLTLDVIGLSIFNYNFDSLTS DSPVIDAVYTALKEAELRSTDI LPY  |
| <i>F. sylvatica</i>   | A FDGTAVNMEEEKFSQLTLDVIGLSVFNYNFDSLTS DSPVIDAVYTALKEAELRSTDI LPY |
| <i>F. excelsior</i>   | ALDGM PVNMEAKFSQLTLDVIGLSVFNYNFDSLTS DSPVIDAVYTALKEAELRSTDI LPY  |

|                       |                                                             |
|-----------------------|-------------------------------------------------------------|
| <i>S. robusta</i>     | WKIKPLCKIIPROIKAEKAVTIIRTTVEELIKQCKEIVS EGERINEEYVNETDPSILR |
| <i>P. chinensis</i>   | WKIKPLCKIIPROIKAEKAVTIIRTTVEELIKQCKEIVS EGERINEEYVNETDPSVLR |
| <i>H. chinensis</i>   | WKIKPLCKIIPROIKAEKAVTIIRTTVEELIKQCKEIVS EGERINEEYVNETDPSILR |
| <i>D. turbinatus</i>  | WKIKPLCKIIPROIKAEKAVTIIRTTVEELIKQCKEIVS EGERINEEYVNETDPSILR |
| <i>V. mangachapoi</i> | WKIKPLCKIIPROIKAEKAVTIIRKTVEELIKQCKEIVS EGERINEEYVNETDPSILR |
| <i>B. pendula</i>     | WK.AVLCRIVPROIKAEKAVTIIRTTVEELIKQCKEIVN EGERINEEYVNETDPSILR |
| <i>O. rehderiana</i>  | .IGVLCRIMVPROIKAEKAVTIIRKTVEELIKQCKEIVK EGERINEEYVNETDPSILR |
| <i>Q. robur</i>       | WKIRTLCKIIPROIKAEKAVTIIRTTVEELIKQCKEIVN EGERINEEYVNETDPSILR |
| <i>F. sylvatica</i>   | WKIRALCKIIPROIKAEKAVTIIRTTVEELIKQCKEIVR EGERINEEYVNETDPSILR |
| <i>F. excelsior</i>   | WKISALCKIIPROIKAEKAVTIIRKAVEELIKQCKEIVK EGERINEEYVNETDPSILR |

LUT1

|                       |                                                              |
|-----------------------|--------------------------------------------------------------|
| <i>S. robusta</i>     | FLASREEVSSLQLRDDLLSMLVAGHETTGSVLTWTLYLLSKDSTSLRAQEEVDRVLOG   |
| <i>P. chinensis</i>   | FLASREEVSSLQLRDDLLSMLVAGHETTGSVLTWTLYLLSKDSTSLRAQEEVDRVLOG   |
| <i>H. chinensis</i>   | FLASREEVSSLQLRDDLLSMLVAGHETTGSVLTWTLYLLSKDSTSLRVQEEVDRVLOG   |
| <i>D. turbinatus</i>  | FLASREEVSSLQLRDDLLSMLVAGHETTGSVLTWTLYLLSKDSSSLRAQEEVDRVLOG   |
| <i>V. mangachapoi</i> | FLASREEVSSLQLRDDLLSMLVAGHETTGSVLTWTLYLLSKDSSSLRAQEEVDRVLOG   |
| <i>B. pendula</i>     | FLASREEVSSLQLRDDLLSMLVAGHETTGSVLTWTFYLLSKDSASLLKAQEEVDRVLEG  |
| <i>O. rehderiana</i>  | FLASREEVSSLQLRDDLLSMLVAGHETTGSVLTWTLYLLSKDPSSLPKAAQEEVDRVLEG |
| <i>Q. robur</i>       | FLASREEVSSLQLRDDLLSMLVAGHETTGSVLTWTLYLLSKDSSSLKAQEEVDRVLEG   |
| <i>F. sylvatica</i>   | FLASREEVSSMLRDDLLSMLVAGHETTGSVLTWTLYLLSKDSSSLKAREEVDRLVLEG   |
| <i>F. excelsior</i>   | FLASREEVSSMLRDDLLSMLVAGHETTGSVLTWTLYLLSKDPSSLLKAREEVDRLVLOG  |

|                       |                                                        |
|-----------------------|--------------------------------------------------------|
| <i>S. robusta</i>     | FLQHLNFELLPDQNISMTTGATIHTTNGLFMKLSQRQSNLTFASSTSR.....  |
| <i>P. chinensis</i>   | FLQHLNFELLPDQNISMTTGATIHTTNGLFMKLSQRQSNLAFASSILR.....  |
| <i>H. chinensis</i>   | FLQHLNFELVPDQNISMTTGATIHTTNGLFMKLSQRQSNLAFASSTSR.....  |
| <i>D. turbinatus</i>  | FLQHLKFELVPDQNISMTTGATIHTTNGLFMKFSQRQSNLAFASSTSR.....  |
| <i>V. mangachapoi</i> | FLQHLNFELVPDQNISMTTGATIHTTNGLFMKLSQRQSNLAFASSTSR.....  |
| <i>B. pendula</i>     | FLQRLNFELVPDQNISMTTGATIHTTDGLYMKLSERRPDIS..SPTSK.....  |
| <i>O. rehderiana</i>  | FLQRLNFELVPDQNIREFVHEA.....QPTPK.....                  |
| <i>Q. robur</i>       | FLQRLNFELVPDQNISMTTGATIHTTDGLYMKLCERKPNFAFSSPTSK.....  |
| <i>F. sylvatica</i>   | FLQRLNFELVPDQDISMTTGATIHTTNGMYMKLSERRSKFDISSPTSK.....  |
| <i>F. excelsior</i>   | FLQHLNFELVPDQNISMTTGATIHTTNGLYMKLSERRKSNFDNSPTPSK..... |

|                       |                                                              |
|-----------------------|--------------------------------------------------------------|
| <i>S. robusta</i>     | HHSAQVWERANEFVPERFDLEGPINPESNTDFRFIPFSGGPRKCVGDQFAMLEAIVALAI |
| <i>P. chinensis</i>   | HHSAQVWERANEFVPERFDLEGPINPESNTDFRFIPFSGGPRKCVGDQFAMLEAIVALAI |
| <i>H. chinensis</i>   | HHSAQVWERANEFVPERFDLEGPMPNESNTDFRFIPFSGGPRKCVGDQFAMLEAIVALAI |
| <i>D. turbinatus</i>  | HHSAQVWERADEFVPERFDLDDPINPESNTDFRFIPFSGGPRKCVGDQFAMLEAIVALAI |
| <i>V. mangachapoi</i> | HHSAQVWERADEFVPERFDLEGPINPESNTDFRFIPFSGGPRKCVGDQFAMLEAIVALAI |
| <i>B. pendula</i>     | HHSQVWERAEFVPERFDLESPIPNETNTDYRFIPFSGGPRKCVGDQFALLEAIVALAI   |
| <i>O. rehderiana</i>  | HHSQVWERAEFVPERFDESSVPNETNTDYRFIPFSGGPRKCVGDQFALLEAIVALAI    |
| <i>Q. robur</i>       | HHSQVWERAEFVPERFDLESVPNETNTDYRFIPFSGGPRKCVGDQFALLEAIVALAI    |
| <i>F. sylvatica</i>   | HHSQVWERAEFVPERFDLESVPNETNTDYRFIPFSGGPRKCVGDQFALLEAIVALAI    |
| <i>F. excelsior</i>   | HHSQVWDRAEFVPERFDLASAIPNETNTDYRFIPFSGGPRKCVGDQFALLEAIVALAV   |

|                       |                                                        |
|-----------------------|--------------------------------------------------------|
| <i>S. robusta</i>     | FLQHLNFELLPDQNISMTTGATIHTTNGLFMKLSQRQSNLTFASSTSR.....  |
| <i>P. chinensis</i>   | FLQHLNFELLPDQNISMTTGATIHTTNGLFMKLSQRQSNLAFASSILR.....  |
| <i>H. chinensis</i>   | FLQHLNFELVPDQNISMTTGATIHTTNGLFMKLSQRQSNLAFASSTSR.....  |
| <i>D. turbinatus</i>  | FLQHLKFELVPDQNISMTTGATIHTTNGLFMKFSQRQSNLAFASSTSR.....  |
| <i>V. mangachapoi</i> | FLQHLNFELVPDQNISMTTGATIHTTNGLFMKLSQRQSNLAFASSTSR.....  |
| <i>B. pendula</i>     | FLQRLNFELVPDQNISMTTGATIHTTDGLYMKLSERRPDIS..SPTSK.....  |
| <i>O. rehderiana</i>  | FLQRLNFELVPDQNIREFVHEA.....QPTPK.....                  |
| <i>Q. robur</i>       | FLQRLNFELVPDQNISMTTGATIHTTDGLYMKLCERKPNFAFSSPTSK.....  |
| <i>F. sylvatica</i>   | FLQRLNFELVPDQDISMTTGATIHTTNGMYMKLSERRSKFDISSPTSK.....  |
| <i>F. excelsior</i>   | FLQHLNFELVPDQNISMTTGATIHTTNGLYMKLSERRKSNFDNSPTPSK..... |







DNA2

*S. robusta* HPDILLISGTRVAA SFNCPRRTVLDERLTSSEYSTAALTGTLLEHIFQAGLKEIPSLNFI  
*P. chinensis* HPDILLISGTRVAA SFNCPRRTVLDERLTSSEYSTAALTGTLLEHIFQAGLKEIPSLNFI  
*H. chinensis* YPDILLISGTRVAA SFNCPRRTVLDERLTSSEYSTAALTGTLLEHIFQAGLKEIPSLNFI  
*D. turbinatus* HPDILLISGTRVAA SFNCPRRTVLDERLTSSEHSTAALTGTLLEHIFQAGLKEIPSLNFI  
*V. mangachapoi* HPDILLISGTRVAA SFNCPRRTVLDERLTSSEHSTAALTGTLLEHIFQAGLKEIPSLNFI  
*B. pendula* HPDILLISGTRVAG SFSCPRRTVLDERLKSSEYSTAALTGTLLEHIFQAGLKEIPSLNFI  
*O. rehdieriana* HPDILLISGTRVAG SFSCPRRTVLDERLKSSEYSTAALTGTLLEHIFQAGLKEIPSLNFI  
*Q. robur* HPDILLISGTRVAG SFSCPRRTVLDERLKSSEYSTAALTGTLLEHIFQAGLKEIPSLNFI  
*F. sylvatica* HPDILLISGTRVAG SFSCPRRAVLDERLKSSEYSTAALTGTLLEHIFQAGLKEIPSLNFI  
*F. excelsior* HPDILLISGTRM. . . . . VLELR. RNQQQEAALMGTLLEHIFQAGLKEIPSLNFI

*S. robusta* EEARLVVLQKNLESLEYACGVKENDMYKTLIEAIPKILNWI FLFKDSQNSKAPTIDFGSDN  
*P. chinensis* EEARLVVLQKNLESLEYACGVKENDMYKTLIEAIPKILNWI FLFKDSQNSKAPTIDFGSDN  
*H. chinensis* EEARLVVLQKNLESLEYACGVNENDMYKTLIEAIPKILNWI FLFKDSQNSKAPTIDFGSDN  
*D. turbinatus* EEARLVVLQKNLESLEYACGVNESDMYKTLIEAIPKILNWI FLFKDSQNSKAPTIDFGSDN  
*V. mangachapoi* EEARLVVLQKNLESLEYACGVNENDMYKTLIEAIPKILNWI FLFKDSQNSKAPTIDFGSDN  
*B. pendula* EEARLVVLQKNLESLEYACGVNENDMYKTLIEAVPKMLNWI ITFKDSQ. . . . .  
*O. rehdieriana* EEARLVVLQKNLESLEYACGVNENDMYKTLIEAVPKILNWI ITFKDSQSKAPSVDFGSDN  
*Q. robur* EEARLVVLQKSIESLEYACGVNENDMYKTLIEAIPKILNWI ITFKDSQSKAPSVDFGSDN  
*F. sylvatica* EEARLV. . . . .  
*F. excelsior* EEARLVVLQKNLENLYACGVDEIDTQKTLIEAIPKILNWI ITFKDSQSKAPSVDFGSDN

*S. robusta* GLKKLNISEVIDIEEMAWAPKYGLKGMIDASVRVQVESSGNEAYEKILPLEFKTGKAPNG  
*P. chinensis* GLKKLNISEVIDIEEMAWAPKYGLKGMIDASVRVQVESSGNEAYEKILPLEFKTGKAPNG  
*H. chinensis* GLKKFNISEVIDIEEMAWAPKYGLKGMIDASVRVQVESSGNEAYEKILPLEFKTGKAPNG  
*D. turbinatus* GLKKVKISEVIDIEEMAWAPKYGLKGMIDASVRVQVESSGNEAYEKILPLEFKTGKAPNG  
*V. mangachapoi* GLKKVNISEVIDIEEMAWAPKYGLKGMIDASVRVQVESSGNEAYEKILPLEFKTGKAPNG  
*B. pendula* . . . . . VIDIEEMAWAPKYGLKGMIDASVR. . . . .  
*O. rehdieriana* GLKKVNISEVIDIEEMAWAPKYGLKGMIDASVRVSI TSNKNQAN EKIMPLEFKTGKAPNG  
*Q. robur* GLKK. . . . . VIDIEEMAWAPKYGLKGMIDASVRANVITSNKNEAHEKIMPLEFKTGKAPNG  
*F. sylvatica* . . . . . VIDIEEMAWAPKYGLKGMIDASVRVNVKSNKNEAQQKIMPLEFKTGK. . . . .  
*F. excelsior* GLKKIKINEVIDIEEMAWAPKYGLKGMIDASVQVRIESTLHEAHEKIMPLEFKTGKAPNG

*S. robusta* Q. AMEHCAQVILYTLMSERYLKPIDSGLLYYLOSDHTQGIIVRRSDLVGLIMRRNELAN  
*P. chinensis* Q. SVEHCAQVILYTLMSERYLKPIDSGLLYYLOSDHTQGIIVRRSDLVGLIMRRNELAN  
*H. chinensis* Q. AMEHCAQVILYTLMSERYLKPIDSGLLYYLOSDHTQGIIVRRSDLVGLIMRRNELAN  
*D. turbinatus* Q. AMEHCAQVILYTLMSERYLKPIDSGLLYYLOSDHTQGIIVRRSDLVGLIMRRNELAN  
*V. mangachapoi* Q. SVEHCAQVILYTLMSERYLKPIDSGLLYYLOSDHTQGIIVRRSDLVGLIMRRNELAN  
*B. pendula* Q. SMEHCAQVIFYTLLMSERYLKHIDRGLLYYLOSDHTQGIIVRRSDLVGLIMRRNELAN  
*O. rehdieriana* Q. SMEHCAQVIFYTLLMSERYLKHIDRGLLYYLOSDHTQGIIVRRSDLVGLIMRRNELAN  
*Q. robur* Q. ASL. . . . . W. . . . . YQKHIDRGLLYYLOSDHTQGIIVRRSDLVGLIMRRNELAN  
*F. sylvatica* Q. SMEHSAQVILYTLMSERYLKHIDRGLLYYLOSDHTQGIIVRRSDLVGLIMRRNELAN  
*F. excelsior* Q. TMEHSAQVILYTLMSERYLKHIDRGLLYYLOSDHTQGIIVRRSDLVGLIMRRNELAN

*S. robusta* DIVKASTTQQLPMLRVPSMCKGCRHLDVCTIYHKALGGDAETSGLGAMYDSLHVHLSNS  
*P. chinensis* DIVKASTTQQLPMLRVPSMCKGCRHLDVCTIYHKALGGDAETSGLGAMYDSLHVHLSNS  
*H. chinensis* DVVKASTTQQLPMLRVPSMCKGCRHLDVCTIYHKALGGDAETSGLGAMYDSLHVHLSNS  
*D. turbinatus* DIVKASTTQQLPMLRVPTMCKGCRHLDVCTIYHKALGGDAETSGLGAMYDSLHVHLSNS  
*V. mangachapoi* DMVKASTSQQLPMLRVPSMCKGCRHLDVCTIYHKALGGDAETSGLGAMYDSLHVHLSNS  
*B. pendula* DILKASTMQQLPMLRVPSMCKGCRHLDVCTIYHKALGGDAETSGLGAMYDSLHVHLSNS  
*O. rehdieriana* DILKASTVQQLPMLRVPSMCKGCRHLDVCTIYHKALGGDAETSGLGAMYDSLHVHLSNS  
*Q. robur* DILKASTIQQLPMLRVPSMCKGCRHLDVCTIYHKALGGDAETSGLGAMYDSLHVHLSNS  
*F. sylvatica* DILKASTTQQLPMLRVPSMCKGCRHLDVCTIYHKALGGDAETSGLGAMYDSLHVHLSNS  
*F. excelsior* DLLKALTAQQLPMLRVPSMCKGCRHLDVCTIYHKALGGDAETSGLGAMYDSLHVHLSNS

*S. robusta* HCSFLRHWDRLIDLEAKEMQLVKREIWHSHTVKRDSSSCFCSTIAL. . . DELPERKSDS  
*P. chinensis* HCSFLRHWDRLIDLEAKEMQLVKREIWHSHTVKRDSSSCFCSTIAL. . . DELPEQKSDG  
*H. chinensis* QSSFLRHWDRLIDLEAKEMQLVKREIWHSHNTKDRSSSCFCSTIAL. . . DELPEWKSDG  
*D. turbinatus* HCSFLRHWDRLIDLEAKEMQLVKREIWHSHTVKRDSSSCFCSTIAL. . . DELPQRKSDG  
*V. mangachapoi* QCSFLRHWDRLIDLEAKEMQLVKREIWHSHTVKRDSSSCFCSTIAL. . . DELPEQKSDG  
*B. pendula* HCTFLRHWDRLIDLEAREIELVKKIWRSHSLKHDNSTSFLSSVLVDASDELPHQNSLQE  
*O. rehdieriana* HCTFLRHWDRLIDLEAREIELVKKIWRSHSLKHDNSTSFLSSVLVDASDELPHQNSLQE  
*Q. robur* HSIFLRHWDRLIDLEAKEIELVKKIWRSHSLKHDNSTSFLSSVLVDASDELPHQNSLQE  
*F. sylvatica* HCSFLRHWDRLIDLEAKEIELVKKIWRSHSLKHDNSTSFLSSVLVDASDELPHQNSLQE  
*F. excelsior* HCTFLRHWDRLIDLEAKALEVKKIWRSHSLKHDNSTSFLSSVLVDASDELPHQNSLQE



DNA2

*S. robusta* NRRFYRFRVQRSPDSEVVEGSAIDPVTAAFSLTNDLGS TLKSGDYVMLSTESGCNPIASGV  
*P. chinensis* NRRFYRFRVQRSPDGNVEGSAIDPLTAASSLTNDLGS TLKSGDYVMLSTESGRNPIASGV  
*H. chinensis* NRRFYRFRVQRSPDGNVEGSAIDPLTAASSLTNDLGS TLKSGDYVMLSTESGRNPIASGI  
*D. turbinatus* NRRFYRFRVQRSPDGNVEGSAIDPLTAASSLTNDLGS TLKSGDYVMLSTESGRNPIASGV  
*V. mangachapoi* NRRFYRFRVQRSPDGNVEGSAIDPLTAASSLTNDLGS TLKSGDYVMLSTESGRNPIASGV  
*B. pendula* NRRFYRFRVYRDLLSVNVKASDGDSSFTVVSPTSDMDC TLKSGDYVILSTESGHLTIASGV  
*O. rehderiana* NRRFYRFRVYRDLLSVNVKASDGDSSFTVVSPTSDMDC TLKSGDYVILSTESGHLTIASGV  
*Q. robur* NRRFYRFRVYRDLLSVNVKASDGDSSFTVVSPTSDMDC TLKSGDYVILSTESGHLTIASGV  
*F. sylvatica* NRRFYRFRVYRDLLSVNVKASDGDSSFTVVSPTSDMDC TLKSGDYVILSTESGHLTIASGV  
*F. excelsior* NRRFYRFRVYRDLLSVNVKASDGDSSFTVVSPTSDMDC TLKSGDYVILSTESGHLTIASGV

*S. robusta* ITDISPIHVSVSFSKRLRLPRSNASSEAEDFIREVWRIDKDNMTSFSVMRFNLVOLFLQ  
*P. chinensis* ITDISPIHVSVSFSKRLRLPRSNASSEAEDFIREVWRIDKDNMTSFSVMRFNLVOLFLQ  
*H. chinensis* ITDISPIHVSVSFSKRLRLPRSNASSEAEDFIREVWRIDKDNMTSFSVMRFNLVOLFLQ  
*D. turbinatus* ITDISPIHVSVSFSKRLRLPRSNASSEAEDFIREVWRIDKDNMTSFSVMRFNLVOLFLQ  
*V. mangachapoi* ITDISPIHVSVSFSKRLRLPRSNASSEAEDFIREVWRIDKDNMTSFSVMRFNLVOLFLQ  
*B. pendula* IKEISRFRHISVSFSKRLRLPRSNASSEAEHDLFIREVWRIDKDEFMTSFAVMRFNLVOLFLR  
*O. rehderiana* ITEISRFRHISVSFSKRLRLPRSNASSEAEHDLFIREVWRIDKDEFMTSFAVMRFNLVOLFLR  
*Q. robur* ITEISRFRHISVSFSKRLRLPRSNASSEAEHDLFIREVWRIDKDEFMTSFAVMRFNLVOLFLR  
*F. sylvatica* ITEISRFRHISVSFSKRLRLPRSNASSEAEHDLFIREVWRIDKDEFMTSFAVMRFNLVOLFLR  
*F. excelsior* ITDVGNSHVSVSFTKRLRLPRSNASSEAEHDLFIREVWRIDKDEFMTSFAVMRFNLVOLFLR

*S. robusta* NAEESHLLRKMIVDLEAPRFDKECVSSODPAISYLRSEKSLNDDQRRAILKILAAKDYALI  
*P. chinensis* NAEESHLLRKMIVDLEAPRFDKECVSSODPAISYLRSEKSLNDDQRRAILKILAAKDYALI  
*H. chinensis* NAEESHLLRKMIVDLEAPRFDKECVSSODPAISYLRSEKSLNDDQRRAILKILAAKDYALI  
*D. turbinatus* NAEESHLLRKMIVDLEAPRFDKECVSSODPAISYLRSEKSLNDDQRRAILKILAAKDYALI  
*V. mangachapoi* NAEESHLLRKMIVDLEAPRFDKECVSSODPAISYLRSEKSLNDDQRRAILKILAAKDYALI  
*B. pendula* SVQSTQLRRIKIVDLEAPRFDKSGCIFSDQPAISYVWSEKSLNDDQRRAILKILAAKDYALI  
*O. rehderiana* SVQSTQLRRIKIVDLEAPRFDKSGCIFSDQPAISYVWSEKSLNDDQRRAILKILAAKDYALI  
*Q. robur* SVQSTQLRRIKIVDLEAPRFDKSGCIFSDQPAISYVWSEKSLNDDQRRAILKILAAKDYALI  
*F. sylvatica* SVQSTQLRRIKIVDLEAPRFDKSGCIFSDQPAISYVWSEKSLNDDQRRAILKILAAKDYALI  
*F. excelsior* NERSHLLRKMIVDLEMPRFDKSGCIFSDQPAISYVWSEKSLNDDQRRAILKILAAKDYALI

*S. robusta* LGMPGTGKTTMVHAVIALLLRGASILLTSYNSAVDNLLIKLKAQDIDFVIRGRHEAVH  
*P. chinensis* LGMPGTGKTTMVHAVKALLLRGASILLTSYNSAVDNLLIKLKAQDIDFVIRGRHEAVH  
*H. chinensis* LGMPGTGKTTMVHAVKALLLRGASILLTSYNSAVDNLLIKLKAQDIDFVIRGRHEAVH  
*D. turbinatus* LGMPGTGKTTMVHAVKALLLRGASILLTSYNSAVDNLLIKLKAQDIDFVIRGRHEAVH  
*V. mangachapoi* LGMPGTGKTTMVHAVKALLLRGASILLTSYNSAVDNLLIKLKAQDIDFVIRGRHEAVH  
*B. pendula* LGMPGTGKTTMVHAVKALLLRGASILLTSYNSAVDNLLIKLKAQDIDFVIRGRHEAVH  
*O. rehderiana* LGMPGTGKTTMVHAVKALLLRGASILLTSYNSAVDNLLIKLKAQDIDFVIRGRHEAVH  
*Q. robur* LGMPGTGKTTMVHAVKALLLRGASILLTSYNSAVDNLLIKLKAQDIDFVIRGRHEAVH  
*F. sylvatica* LGMPGTGKTTMVHAVKALLLRGASILLTSYNSAVDNLLIKLKAQDIDFVIRGRHEAVH  
*F. excelsior* LGMPGTGKTTMVHAVKALLLRGASILLTSYNSAVDNLLIKLKAQDIDFVIRGRHEAVH

*S. robusta* EEVRGHCFSAMNHSVNDIKIRLSQVKKVAVTCLGITSPLLSGKRFDVDCIMDEAGQITLP  
*P. chinensis* EEVRGHCFSAMNHSVNDIKIRLSQVKKVAVTCLGITSPLLSGKRFDVDCIMDEAGQITLP  
*H. chinensis* EEVRGHCFSAMNHSVNDIKIRLSQVKKVAVTCLGITSPLLSGKRFDVDCIMDEAGQITLP  
*D. turbinatus* EEVRGHCFSAMNHSVNDIKIRLSQVKKVAVTCLGITSPLLSGKRFDVDCIMDEAGQITLP  
*V. mangachapoi* EEVRGHCFSAMNHSVNDIKIRLSQVKKVAVTCLGITSPLLSGKRFDVDCIMDEAGQITLP  
*B. pendula* EEVRGHCFSAMNHSVNDIKIRLSQVKKVAVTCLGITSPLLSGKRFDVDCIMDEAGQITLP  
*O. rehderiana* EEVRGHCFSAMNHSVNDIKIRLSQVKKVAVTCLGITSPLLSGKRFDVDCIMDEAGQITLP  
*Q. robur* EEVRGHCFSAMNHSVNDIKIRLSQVKKVAVTCLGITSPLLSGKRFDVDCIMDEAGQITLP  
*F. sylvatica* EEVRGHCFSAMNHSVNDIKIRLSQVKKVAVTCLGITSPLLSGKRFDVDCIMDEAGQITLP  
*F. excelsior* TVEGNCISAMKMESTQEIKKIKLDQVKKVAVTCLGITSPLLSGKRFDVDCIMDEAGQITLP

*S. robusta* VSLGPLMFASMFVLVGDHYQLPPLVQSTEARENGMGISLFCRLSEAHPOAISALCSQYRM  
*P. chinensis* VSLGPLMFASMFVLVGDHYQLPPLVQSTEARENGMGISLFCRLSEAHPOAISALCSQYRM  
*H. chinensis* VSLGPLMFASMFVLVGDHYQLPPLVQSTEARENGMGISLFCRLSEAHPOAISALCSQYRM  
*D. turbinatus* VSLGPLMFASMFVLVGDHYQLPPLVQSTEARENGMGISLFCRLSEAHPOAISALCSQYRM  
*V. mangachapoi* VSLGPLMFASMFVLVGDHYQLPPLVQSTEARENGMGISLFCRLSEAHPOAISALCSQYRM  
*B. pendula* VSLGPLMFASMFVLVGDHYQLPPLVQSTEARENGMGISLFCRLSEAHPOAISALCSQYRM  
*O. rehderiana* VSLGPLMFASMFVLVGDHYQLPPLVQSTEARENGMGISLFCRLSEAHPOAISALCSQYRM  
*Q. robur* VSLGPLMFASMFVLVGDHYQLPPLVQSTEARENGMGISLFCRLSEAHPOAISALCSQYRM  
*F. sylvatica* VSLGPLMFASMFVLVGDHYQLPPLVQSTEARENGMGISLFCRLSEAHPOAISALCSQYRM  
*F. excelsior* VSLGPLMLASKFVLVGDHYQLPPLVQSTEARENGMGISLFCRLSEAHPOAISALCSQYRM





e cysQ

*S. robusta* MEACLVKCP.GNVLQRALKP.....LRCS..SSMATNS.GKFSVKTAYDAVLL  
*P. chinensis* ..MTRC CW.....TLEVPSY  
*H. chinensis* MEACLMKCP.GNALRRVLKP.....LRCS..SSMAIHS.GKISVKTAYDAVLL  
*D. turbinatus* MEACLVKCP.GNALRRVLKP.....FRSS..SSMAIHS.GKISVKTAYDAVLL  
*V. mangachapoi* MEACLVKCP.GNALRRVLKP.....LRCS..SSMAINS.GKISVKTAYDAVLL  
*B. pendula* METCLMRC SHGGSTLFRALKP..PLSMKLPNSLCC..SFMAIHTDGGRSVKTAYDALLL  
*O. rehdieriana* METCLMRC SHGGSTLFRVLKP..PLSMKLPNSL...SFMAIHTDGGRSIKRAYDALLL  
*Q. robur* METCLMKC SH.GRALFRALKP..LSLKLPSIHC...SSMAIHTDGGRWTKRAYDTLLL  
*F. sylvatica* METCLMKC SH.GSALFRALKP..P.SLKLPSIRC...SSMAIHTGGSCAKRAYDALLL  
*F. excelsior* MEAC.....TLFKPLKPSNLNFKISIPSRFSSNFSSSTRIHAGGDRMTKRAYDGILL

*S. robusta* DAGCTLLQLTRPVEETYASIGAKYGLKATPSDIKKG.....  
*P. chinensis* NWQCLWKR L TSFI.....GAKYGLNATPSDIKKG.....  
*H. chinensis* DAGCTLLQLARPVEETYASIGAEYGLKATPSDIKKG.....  
*D. turbinatus* DAGCTLLQLARPVEQTYASIGAKYGLKATPSDIKKG.....  
*V. mangachapoi* DAGCTLLQLASPVEETYASIGAKYGLKATPSDIKKG.....  
*B. pendula* DAGCTLLQLAKPVEETYATIGSKYGLSATSAEIKQG.....  
*O. rehdieriana* DAGCTLLQLAKPVEETYATIGSKYGLSATSAEIKQG.....  
*Q. robur* DAGCTLLQLAKPVEEYATIGCKYGLSATSAEIKQGFRRFAAPWPEKLRVQVCLSATSA  
*F. sylvatica* DAGCTLLQLAKPVEEYATIGSKYGLSATSAEIKQG.....  
*F. excelsior* DAGCTLLQLAKPVEEYTLTIGQKYGLKATVADIKQG.....

*S. robusta* .....FKSAFSAAPWPEKLRVQGDGRPFWKLVSEATSCANEDYFEEVYQ.....  
*P. chinensis* .....FKRAFSAAPWPKLRVQGDGRPFWKLVSEATGCANDDYFEEVYQ.....  
*H. chinensis* .....FRRAFPAPWPEKLRVQGDGRPFWKLVSEATGCANDDYFEEVYQ.....  
*D. turbinatus* .....FKRAFSAAPWPEKLRVQGDGRPFWKLVSEATGCANDDYFEEVYE.....  
*V. mangachapoi* .....FKRAFSAAPWPKLRVQGDGRPFWKLVSEATGCANDDYFEEVYE.....  
*B. pendula* .....FKRAFSAAPWPEKLRVQGDGRPFWKLVSEATGCANDDYFEEVYE.....  
*O. rehdieriana* .....FKRAFSAAPWPKLRVQGDGRPFWKLVSEATGCANDDYFEEVYE.....  
*Q. robur* EIKQGFRRFAAPWPEKLRVQGDGRPFWKLVSEATGCANDDYFEEVYE.....  
*F. sylvatica* .....FRRFAAPWPEKLRVQGDGRPFWKLVSEATGCADGDYFEEVYEVIFLKNKLPKL  
*F. excelsior* .....FKRAFSAAPWPEKLRVQDGRPFWRLLVSEATGCDS DNYFEEVYK.....

*S. robusta* .....YYANGDAWHLPDGAHQTIILLKDAGVKMAVVSNFDTLRKLLKDLNVLDLFDVAV  
*P. chinensis* .....YYANGDAWHLPDGAHQTIILLKDAGVKMAVVSNFDTLRKLLKDLNAILDFDAV  
*H. chinensis* .....YYANGDAWHLPDGAHQTIILLKNAGVKMAVVSNFDTLRKLLKDLNVLDLFDVAV  
*D. turbinatus* .....YYANGDAWHLPDGAHQTIILLKDVGVKMAVVSNFDTLRKLLKDLNVLDLFDVAV  
*V. mangachapoi* .....YYANGDAWHLPDGAHQTIILLKDAGVKMAVVSNFDTLRKLLKDLNVLDLFDVAV  
*B. pendula* .....YYAKGDAWRLLPDGAYETIALLKDAGVKVAVVSNFDTLRKLLKDLNVLDLFDVAV  
*O. rehdieriana* .....YYAKGDAWHLPDGAJETIALLKDAGVKVAVVSNFDTLRKLLKDLNVLDLFDVAV  
*Q. robur* .....YYAKGDAWRLLPDGAYETITLLRDAG.....DLFDVAV  
*F. sylvatica* LVLSPLYYAKGDAWHLPDGAJETITLLKDAGVKIAVVSNFDTLRKLLKDLNVLDLFDVAV  
*F. excelsior* .....YYANGDAWHLPDGAJETITLLKDSGVKLAVVSNFDTLRKLLKDLNVLDLFDVAV

*S. robusta* IISSEVGYEKPDARIFKKAAL.....DQVGVEAGRSVHIGDDEKADKMGANAVGIDCWLW  
*P. chinensis* IISSEVGYEKPDARIFKKAAL.....DQVGVEAGRSVHIGDDEKADKMGANAVGIDCWLW  
*H. chinensis* IISSEVGYEKPDARIFKKAAL.....DQVGVEAGRSVHIGDDEKADKMGANAVGIDCWLW  
*D. turbinatus* IISSEVGYEKPDARIFKKAAL.....DQVGVEAGRSVHIGDDEKADKMGANAVGIDCWLW  
*V. mangachapoi* IISSEVGYEKPDARIFKKAAL.....DQVGVEAGRSVHIGDDEKADKMGANAVGIDCWLW  
*B. pendula* IISSEVGYEKPDARIFKKAAL.....DQVGVEAGRSVHIGDDEKADKMGANAVGIDCWLW  
*O. rehdieriana* IISSEVGYEKPDARIFKKAAL.....DQVGVEAGRSVHIGDDEKADKMGANAVGIDCWLW  
*Q. robur* IISSEVGYEKPDARIFKKAAL.....DQVGVEAGRSVHIGDDEKADKMGANAVGIDCWLW  
*F. sylvatica* IISSEVGYEKPDARIFKKAAL.....DQVGVEAGRSVHIGDDEKADKMGANAVGIDCWLW  
*F. excelsior* IISSEVGYEKPDARIFKKAAL.....DQVGVEAGRSVHIGDDEKADKMGANAVGIDCWLW

*S. robusta* GRDVKTFSDIQKRIFILDA  
*P. chinensis* GRDVKTFSDIQKRIFISDA  
*H. chinensis* RSDVKTFSDIQKRIFISDA  
*D. turbinatus* GRDVKTFSDIQKRIFILDE  
*V. mangachapoi* GRDVKTFSDIQKRIFISDE  
*B. pendula* GTDIKTFSDIGSRILISES  
*O. rehdieriana* GIDIKTFSGISRILISES  
*Q. robur* .....GT.....  
*F. sylvatica* GIDVKTFSDIGNRILISEP  
*F. excelsior* GVDVKTFSDIQNRILLPBP

f BLM

|                       |                             |                                      |      |
|-----------------------|-----------------------------|--------------------------------------|------|
| <i>S. robusta</i>     | ANHVQEMKDMLIAVSNELLDNAANLS  | SPQQIEKLRQDRLOLNKQIQOLERYLN...       | DAER |
| <i>P. chinensis</i>   | ANHVQEMKDMLIAVSNELLDNAADNLS | SPQQIEKLRQDRLOLNKQIQOLERYLN...       | DAER |
| <i>H. chinensis</i>   | ANHVQEMKDMLIAVSNELLDNAANLS  | SPQQIEKLRQDRLOLNKQIQOLERYLN...       | DAER |
| <i>D. turbinatus</i>  | ANHVQEMKDMLIAVSNELLDNAANLS  | SPQQIEKLRQDRLOLNKQIQOLERYLN...       | DAER |
| <i>V. mangachapoi</i> | ANHVQEMKDMLIAVSNELLDNAANLS  | PHQIEKLHQDRLOLNKQIQOLERYLN...        | DAER |
| <i>B. pendula</i>     | .....                       | .....LLLNKQIQOLDGYLHANSVDEER         |      |
| <i>O. rehderiana</i>  | AAHLQEMKDMLIVISNELLDNVNE    | LSLEQIEFLRRDRLOLNKQIQOLDGYLRANSVDEER |      |
| <i>Q. robur</i>       | TTHLQEMKDMLIVISNELLDNVNE    | LSSEHIEKLRQDRLOLNKQIQOLDGYLRANSVDEER |      |
| <i>F. sylvatica</i>   | ATHLQEMKDMLIVISNELLDNVNE    | LSLEHIEKLRQDRLOLNKQIQOLDGYLRANSVDEER |      |
| <i>F. excelsior</i>   | .....NA                     | DNLSDFEKLROERQOLNKQIRHLEKYLHSTSVNBER |      |

|                       |            |                                         |        |         |        |
|-----------------------|------------|-----------------------------------------|--------|---------|--------|
| <i>S. robusta</i>     | QKSHFAAST  | ASRTFQYETPQATASWIEPSKFTQVHLHNDSS        | MCRNWD | TASASFP | SFNN   |
| <i>P. chinensis</i>   | QKSHFAAST  | ASRSFQYEMPQATASWIEPSKFTQVHLRNDSS        | MCRNWD | TASVSFP | SFNN   |
| <i>H. chinensis</i>   | QKSHFVAST  | TSRTFQYETPQATASWIEPSKFTQVHLRNDSS        | MCRNWD | TASVSFP | SFNN   |
| <i>D. turbinatus</i>  | QKSHFAAST  | ASRTFQYETPQATASWIDPSKFTQVHLHNDSS        | MCRNWD | TASVSFP | SFNN   |
| <i>V. mangachapoi</i> | KKSHFAAST  | ASHTFRHETPQATASRIDPSKFTQVHLHNDSS        | VCWNNS | SPSVSFP | SFNN   |
| <i>B. pendula</i>     | QRSHYCIHG  | .....SYQLIYKNEAGYERWNS                  | SPSVS  | SFSDVR  |        |
| <i>O. rehderiana</i>  | QSSHYSTATA | ATRPFQYETPEAATLRT.SMRCDAHVNLHNEAGYERWNS | TVS    | SFSDVR  |        |
| <i>Q. robur</i>       | QKSHYSTST  | AIRSFQYETPQAATAFKT.PMRFEAQVNLNELG       | SNERWN | ...SF   | SSDVR  |
| <i>F. sylvatica</i>   | QRSHYSTST  | AATRSFQYETPQADAFKT.SMRFEAQVNLNELG       | SYERWN | ...SF   | SSDVR  |
| <i>F. excelsior</i>   | KMSQFSST   | .LSTPMTFQTPPAVPRIDSTRLDRFQINTESS        | FDRWGS | SPSFP   | SYSTDR |

|                       |           |           |             |      |                              |
|-----------------------|-----------|-----------|-------------|------|------------------------------|
| <i>S. robusta</i>     | FDVSSAVG  | REPYIPKI  | IEVNYIEGSND | QQRW | SRDFSWTKKLEANNKKVFGNHSFRPNQR |
| <i>P. chinensis</i>   | LDISSAPV  | GREPYIPKI | IEVNYIEGSND | QQRW | SRDFSWTKKLEANNKKVFGNHSFRPNQR |
| <i>H. chinensis</i>   | FDVSSAPV  | GREPYIPKI | IEVNYIEGSND | QQRW | SRDFSWTKKLEANNKKVFGNHSFRPNQR |
| <i>D. turbinatus</i>  | FDVSSAPV  | GREPYIPKI | IEVNYIEGSND | QQRW | SRDFSWTKKLEANNKKVFGNHSFRPNQR |
| <i>V. mangachapoi</i> | FDVSSAPV  | GREPYIPKI | IEVNYIEGSND | QQRW | SRDFSWTKKLEANNKKVFGNHSFRPNQR |
| <i>B. pendula</i>     | FGVSSGPM  | EREPYIPKY | VEVNYIEGSND | KKCS | SGNFPWTKKMEAINKKVFGNHSFRPNQR |
| <i>O. rehderiana</i>  | FGVSSGPV  | EREPYIPKY | AEVNYIEGSND | KKWS | SGNFPWAKKLEANNKKVFGNHSFRPNQR |
| <i>Q. robur</i>       | FDVSSVPLE | REPYVPKY  | VEVNYIEGSND | KKWS | QNFPPWAKKLEANNKKVFGNHSFRPNQR |
| <i>F. sylvatica</i>   | FDVLSGPLE | REPYIPKY  | VEVNYIEGSND | KKWS | ENFPWTKKLEANNKKVFGNHSFRPNQR  |
| <i>F. excelsior</i>   | FGVSTAPLE | REPYVPKY  | IEVNYIEGSND | KKWS | GWDFPWTKKLEANNKKVFGNHSFRPNQR |

|                       |            |           |                    |                    |      |
|-----------------------|------------|-----------|--------------------|--------------------|------|
| <i>S. robusta</i>     | EVINATMSGH | DVFLMPTGG | GKSLTYQLPALICPGITL | VISPLVSLIQDQIMHLLQ | .... |
| <i>P. chinensis</i>   | EVINATMTGH | DVFLMPTGG | GKSLTYQLPALICPGITL | VISPLVSLIQDQIMHLLQ | ANIP |
| <i>H. chinensis</i>   | EVINATMSGH | DVFLMPTGG | GKSLTYQLPALICPGITL | VISPLVSLIQDQIMHLLQ | ANIP |
| <i>D. turbinatus</i>  | EVINATMSGH | DVFLMPTGG | GKSLTYQLPALICPGITL | VISPLVSLIQDQIMHLLQ | ANIP |
| <i>V. mangachapoi</i> | EVINATMSGH | DVFLMPTGG | GKSLTYQLPALICPGITL | VISPLVSLIQDQIMHLLQ | ANIP |
| <i>B. pendula</i>     | EAINAAMSGY | DVFLMPTGR | GKSLTYQLPALICPGITL | VISPLVSLIQDQIMHLLQ | ANIP |
| <i>O. rehderiana</i>  | EVINATMSGC | DVFLMPTGG | GKSLTYQLPALICPGITL | VISPLVSLIQDQIMHLLQ | ANIP |
| <i>Q. robur</i>       | EVINATMSGC | DVFLMPTGG | GKSLTYQLPALICPGITL | VISPLVSLIQDQIMHLLQ | ANIP |
| <i>F. sylvatica</i>   | EVINATMSGY | DVFLMPTGG | GKSLTYQLPALICPGITL | VISPLVSLIQDQIMHLLQ | ANIP |
| <i>F. excelsior</i>   | EVINATMSGY | DVFLMPTGG | GKSLTYQLPALICPGITL | VISPLVSLIQDQIMHLLQ | ANIP |



9 LRPPRC

*S. robusta* MEKAWLFFYWAS KIKGFKHDQFTYTTMLDIFGEAGRIS SMKYVFQOMOEKGTIDAVTYT  
*P. chinensis* MEKAWLFFYWAS KIKGFKHDQFTYTTMLDIFGEARRIS SMKYVFQOMOEKGTIDAVTYT  
*H. chinensis* MEKAWLFFNWS KIKGFKHDQFTYTTMLDIFGEAGRIS SVKYVFQOMOEKGTIDAVTYT  
*D. turbinatus* MEKAWLFFNWS KIKGFKHDQFTYTTMLDIFGEAGRIS SMKHVFQOMOEKGTIDAVTYT  
*V. mangachapoi* MEKAWLFFNWS KIKGFKHDQFTYTTMLDIFGEAGRIS SMKYVFQOMOEKGTIDAVTYT  
*B. pendula* MEKAWLFFNWS RLKGFKHDQFTYTTMLDIFGEAGRIP SMKHVFQOMOEKGLKIDAVTYT  
*O. reheriana* MEKAWLFFNWS RLKGFKHDQFTYTTMVGIFGEAGRIS SMNYVFE LMRKGLKIDAVTYT  
*Q. robur* MEKAWLFFNWS KIKGFKHDQFTYTTMLDIFGEAGRVA SMKHVFEOMOEKGLKIDAVTYT  
*F. sylvatica* MEKAWLFFNWS RLKGFKHDQFTYTTMLDIFGEAGRIS SMKHVFEOMOEKGLKIDAVTYT  
*F. excelsior* MEKAWLFFNWS GRKNFKHDQFTYTTMLDIFGEARRIS SMKYVFQOMOEKGLKIDVVTYT

*S. robusta* SVMHWVSRG GDVDGAVEVWEEMREKGC EPTVVSYTAYMKILFDNKR VKEATDIFYKEMLOS  
*P. chinensis* SVMHWVSRG GDVDGAVEVWEEMREKGC EPTVVSYTAYMKILFDNKR VKEATDIFYMEMLOS  
*H. chinensis* SVMHWVSRG GDVDGAVEVWEEMREKGC EPTVVSYTAYMKILFDNKR VKEATDIFYKEMLOS  
*D. turbinatus* SVMHWVSRG GDVDGAVEVWEEMREKGC EPTVVSYTAYMKILFDNKR VKEATDIFYKEMLOS  
*V. mangachapoi* SVMHWVSRG GDVDGAVEVWEEMREKGC EPTVVSYTAYMKILFDNKR VKEATDIFYKEMLOS  
*B. pendula* SLMHWLSSS GDVDGAVKVVWEEMKNGC YPTVVSYTAYMKVLFDN SRAKEATDIFYREMLRS  
*O. reheriana* SLMHWLSSS GDVDRAVKVVWEEMKANGC FLTVVSYTAYMKVLFDN SRAKEATDIFYREMLRS  
*Q. robur* SLMHWLSSS GNVGAIKVVWEEMKNGC FPTVVSYTAYMKILFDN NRAKEATEVYKEMLRS  
*F. sylvatica* SLMHWLSSS GDVDGAMKVVWEEMKNGC FLTVVSYTAYMKILFDN GRASEATDAYKEMLRS  
*F. excelsior* SLLHWMSND GDVDGAVKLVWEEMKLGCR PTVVSYTAFMKILFDH KRVKEATEVYKEMLOS

*S. robusta* GISPNCHTYT VLMEHLIGAGKYNEALDIFNMQEAEVK PDKAACNVL IEKCKARETGAI  
*P. chinensis* GISPNCHTYT VLMEHLIDAGKYNEALDIFNMQEAGVK PDKAACNVL IEKCKARETGAI  
*H. chinensis* GISPNCYTYT VLMEHLIDAGKYNEALDIFNMQEAGVK PDKAACNVL IEKCKVRETGAI  
*D. turbinatus* GITPNGHYTYT VLMEHLMGAGKYNEALDIFNMQEAGVK PDKAACNVL IEKCKTRATGAI  
*V. mangachapoi* GISPNCHTYT VLMEHLIGAGKYDEALDIFNMQEAGVK PDKAACNVL IEKCKARETGAI  
*B. pendula* GCAPNCHTYT VLMEYLVGSGKYKEALEMFCMQEAGAQ PDKAACNVL IEKCKARETGAI  
*O. reheriana* GCTPNCHTYT VLMEYLVGSGKYKEALEMFCMQEAGTQ PDKAACNVL IEKCKMAGETKAF  
*Q. robur* GFSPTCHTYT VLMEYLVGSGKYEEALEIFSKMQEAGIQ PDKAACNVL IEKCKAGETRAL  
*F. sylvatica* GCAPTCHTYT VLMEYLVGSGECNTVF.....LVEG.VMIAACGKV  
*F. excelsior* GLSPNCYTYT VLMEHLACSGKFD EALEVFNMQEAGVQ PDKATCNL IVEIC CRTGETWAM

*S. robusta* TQILQYMKHF LVLRYPIFLETLKTLN AAGESD LLLRQVHPHISPECVSDEKEVELIRNG  
*P. chinensis* TQILQYMKHF LVLRYPIFLEALKILN AAGESD LFLRQVHPHISVEHVSDEKEVELIRNG  
*H. chinensis* TQILQYMKENFLVLRYPFLEALKTLN AAGESD LLLRQVHPHISVERVSDEKEVELIRNA  
*D. turbinatus* TQILQYMKENFLVLRYPFLEALKSLN AAGESD LLLRQVHPHISVECVSDKKEVELIGNA  
*V. mangachapoi* TLLILQYMKENFLVLRYPFLEALKTLN AAGESD LLLRQVHPHISAEVVTDEKEVEPIRNA  
*B. pendula* TLLILQYMKESRLVLRYPVFLKALKIAGES SALLMQVNP HFS TICVSEEEAVDLRPTA  
*O. reheriana* TLLILQYMKQNLVLRYPVFLKALKIAGES SALLMQVNP HFS TICVSEEEAGDLRATG  
*Q. robur* TLLILQYMKESRLVLRYPVFLKALKIAGES SALLMQVNP HFS TICVSEEEAVDLRPTA  
*F. sylvatica* SVWAGTVTCS MWPLRWG.....DALVSSI.....  
*F. excelsior* MKILQYMKENL LVLRYPVYQKALETFK MAGESYELLRQVNRHFVIEHFKEEKTDFKGFETA

*S. robusta* SEVTL SLERELVLL LKKQNL LAVDHL LAALGDKNKQLDPAIISTIEANGNHCRLD GAL  
*P. chinensis* SEVTF SLERELVLL LKKQNL LAVDHL LAALGDKNKQLDPAIISTIEANSNHCR LAGAL  
*H. chinensis* SEVNL SLERELVLL LKKQNL LAVDHL LAALGDKNKQLDPAIISTIEANSNH LQ.....  
*D. turbinatus* SEVTL SLERELVSL LKKQNL LAIDHL LAALGDRNKR LDP AIISTIEANGNHCRLD GAL  
*V. mangachapoi* SEVTL SLERELVLL LKKQNL LAVDHL LAALGDENKQLDPAIIT TIEANGNHCRLD GAL  
*B. pendula* ADVPF SIDRGLLIFLKKRN LVAIDRLTGTIDKNIRLDSAIIS IIVEANCDCRRS GAL  
*O. reheriana* ADVPF SIDRGLLIFLKKRN LVAIDRLTGTIDKNIRLDSAIIS IIVEANCDCRRS GAL  
*Q. robur* SDTSY GIDRGLLIFLKKRN LVAIDRLTGTIDKNMQLDSAIISAI IKENCGHRRS GAL  
*F. sylvatica* .....LVSHLGGDGRS WNVKFLRDFHDWELESA.....  
*F. excelsior* RVNCF NVDSGF VLNLINKQNFVAIDY LADMDKGVRLDSKIISTIEELNS TNGRWNSAL

*S. robusta* SAFNYSVKMS IILERTAF LALIGLIRSNAFISVVS IVEEMVRAGYSLGVYLGSLLIYRL  
*P. chinensis* SAFNYSVKMS IILERTAF LSLIGLIRSNFTISVVS IVEEMVRAGYSPGVYLGSLLIYRL  
*H. chinensis* .....ARWC IIGLQL.....  
*D. turbinatus* LAFNYSVKMS IILERTYLA LIGLIRSNFTICVVS IVEEMVRAGYSLGVYLGSLLIYRL  
*V. mangachapoi* SAFNYSVKMS IILERTYLA LIGLIRSNFTISVVS IVEEMVRAGYSLGVYLGSLLIYRL  
*B. pendula* LAFKYSVRMG IITERNAYLS LIGLIMRSNSFSKVVE IVEAMIRIGQSLGTYQSALLIYRL  
*O. reheriana* LAFKYSVRMG IITERNAYLS LIGLIMRSNSFSKVVE IVEAMIRIGQSLGTYQSALLIYRL  
*Q. robur* LAFKYSVRMG IITERNAYLS LIGLIRSNYSFAKVVKVVEAMIGAGHSLGTYQSALLIYRL  
*F. sylvatica* .....TSFLELI.....  
*F. excelsior* FAF EYGVKFG LNIDRIAYIAL IGLSIRTNSFSKAVE IVEEMVREHSLGTQQSALLIYHL



# h LSD1

|                       |                                               |                  |
|-----------------------|-----------------------------------------------|------------------|
| <i>S. robusta</i>     | .....                                         | MAQIPNLDNSPINKSK |
| <i>P. chinensis</i>   | .....LLDASHRNL.RSLPRSFRRSSADS                 | MAQIPNLDNSPINKSK |
| <i>H. chinensis</i>   | .....ISRRSSADS                                | MAQIPNLDNSPINKSK |
| <i>D. turbinatus</i>  | .....LLQASHRKLKSGSLPRSFRRSSADS                | MAQIPNLDNSPINKSK |
| <i>V. mangachapoi</i> | .....                                         | MAQIPNLDNSPINKSK |
| <i>B. pendula</i>     | .....                                         | MAQIPNLDNAPLNFT  |
| <i>O. rehderiana</i>  | .....                                         | MAQIPNLDNAPLNFT  |
| <i>Q. robur</i>       | .....                                         | MAQIPNLDNAPLNFT  |
| <i>F. sylvatica</i>   | MKVRGTERQREACKSIGVMEVKEIKRESQKREIPSLYNTERHFAP | MAQIPNLDNAPLNFT  |
| <i>F. excelsior</i>   | .....                                         | MAQIPNLDNAPLNFT  |

|                       |                 |                                             |
|-----------------------|-----------------|---------------------------------------------|
| <i>S. robusta</i>     | SMRDQSQRDLLKILK | IRGKKCLVIEPKLGGSLSLIIQTSILKEHGVLELRHLSPEPVO |
| <i>P. chinensis</i>   | SIREQSQRDLLKILK | IRGKKCLVIEPKLGGSLSLIIQTSLLKEHGVLELRHLSPEPVO |
| <i>H. chinensis</i>   | SIREQSQRDLLKILK | IRGKKCLVIEPKLGGSLALIIQTSLLKEHGVLELRHLSPEPVO |
| <i>D. turbinatus</i>  | SIREQSQRDLLKILK | IRGKKCLVIDPKLGGSLSLIIQTSLLKEHGVLELRHLSPEPVO |
| <i>V. mangachapoi</i> | SIREQSQRDLLKILK | IRGKKCLVIEPKLGGSLSLIIQTSLLKEHGVLELRHLSPEPVO |
| <i>B. pendula</i>     | SLREQSQRDLLKILK | IRGKKCLVIDPKLGGSLSLIIQTSLLKEHGVLELRHLSADPIQ |
| <i>O. rehderiana</i>  | SLREQSQRDLLKILK | IRGKKCLVIDPKLGGSLSLIIQTSLLKEHGVLELRHLSADPIQ |
| <i>Q. robur</i>       | SLREQSQRDLLKILK | IRGKKCLVIDPKLGGSLSLIIQTSLLKEHGVLELRHLSADPIQ |
| <i>F. sylvatica</i>   | SLREQSQRDLLKILK | IRGKKCLVIDPKLGGSLSLIIQTSLLKEHGVLELRHLSADPIQ |
| <i>F. excelsior</i>   | SLREQSQRDLLKILK | IRGKKCLVIDPKLGGSLSLIIQTSLLKEHGVLELRHLSADPIQ |

|                       |                      |                         |                  |
|-----------------------|----------------------|-------------------------|------------------|
| <i>S. robusta</i>     | CTKVVYLVLRPORDLMKIIS | SHVNDISKGLQREYIYFVPRRQV | CEKILEBEKVVHNLMT |
| <i>P. chinensis</i>   | CTKVVYLVLRPORDLMKIIS | SHVNDISKGLQREYIYFVPRRQV | CEKILEBEKVVHNLMT |
| <i>H. chinensis</i>   | CTKVVYLVLRPORDLMKIIS | SHVNDISKGLQREYIYFVPRRQV | CEKILEBEKIVHNLMT |
| <i>D. turbinatus</i>  | CTKVVYLVLRPORDLMKIIS | SHVNDISKGLQREYIYFVPRRQV | CEKILEBEKVVHNLMT |
| <i>V. mangachapoi</i> | CTKVVYLVLRPORDLMKIIS | SHVNDISKGLQREYIYFVPRRQV | CEKILEBEKVVHNLMT |
| <i>B. pendula</i>     | CTKVVYLVLRPORDLMKIIS | SHVNDISKGLQREYIYFVPRRQV | CEKILEBEKVVHNLMT |
| <i>O. rehderiana</i>  | CTKVVYLVLRPORDLMKIIS | SHVNDISKGLQREYIYFVPRRQV | CEKILEBEKVVHNLMT |
| <i>Q. robur</i>       | CTKVVYLVLRPORDLMKIIS | SHVNDISKGLQREYIYFVPRRQV | CEKILEBEKVVHNLMT |
| <i>F. sylvatica</i>   | CTKVVYLVLRPORDLMKIIS | SHVNDISKGLQREYIYFVPRRQV | CEKILEBEKVVHNLMT |
| <i>F. excelsior</i>   | CTKVVYLVLRPORDLMKIIS | SHVNDISKGLQREYIYFVPRRQV | CEKILEBEKVVHNLMT |

|                       |                 |                    |              |            |
|-----------------------|-----------------|--------------------|--------------|------------|
| <i>S. robusta</i>     | IGEYALYVVPFDEDV | LSFELDLAYKECQVDGDT | SLWHIAKAIHRL | .....      |
| <i>P. chinensis</i>   | IGEYALYVVPFDEDV | LSFELDLAYKECQVDGDT | SLWHIAKAIHRL | SSFGIIPNVR |
| <i>H. chinensis</i>   | IGEYALYVVPFDEDV | LSFELDLAYKECQVDGDT | SLWHIAKAIHRL | SSFGIIPNVR |
| <i>D. turbinatus</i>  | IGEYALYVVPFDEDV | LSFELDLAYKECQVDGDT | SLWHIAKAIHRL | SSFGIIPNVR |
| <i>V. mangachapoi</i> | IGEYALYVVPFDEDV | LSFELDLAYKECQVDGDT | SLWHIAKAIHRL | SSFGIIPNVR |
| <i>B. pendula</i>     | IGEYALYVVPFDEDV | LSFELDLAYKECQVDGDT | SLWHIAKAIHRL | SSFGIIPNVR |
| <i>O. rehderiana</i>  | IGEYALYVVPFDEDV | LSFELDLAYKECQVDGDT | SLWHIAKAIHRL | SSFGIIPNVR |
| <i>Q. robur</i>       | IGEYALYVVPFDEDV | LSFELDLAYKECQVDGDT | SLWHIAKAIHRL | SSFGIIPNVR |
| <i>F. sylvatica</i>   | IGEYALYVVPFDEDV | LSFELDLAYKECQVDGDT | SLWHIAKAIHRL | SSFGIIPNVR |
| <i>F. excelsior</i>   | IGEYALYVVPFDEDV | LSFELDLAYKECQVDGDT | SLWHIAKAIHRL | SSFGIIPNVR |

|                       |                   |                 |                |                      |
|-----------------------|-------------------|-----------------|----------------|----------------------|
| <i>S. robusta</i>     | .....             | MTVPEINTLILIDRE | VDMVTPM        | CSQTYEGLLDEFL        |
| <i>P. chinensis</i>   | GKASVLVADILNRMQTE | EEPVNSLDM       | TVPEINTLILIDRE | VDMVTPMCSQTYEGLLDEFL |
| <i>H. chinensis</i>   | GKASVLVADILNRMQTE | EEPVNSLDM       | TVPEINTLILIDRE | VDMVTPMCSQTYEGLLDEFL |
| <i>D. turbinatus</i>  | GKASVLVADILNRMQTE | EEPVNSLDM       | TVPEINTLILIDRE | VDMVTPMCSQTYEGLLDEFL |
| <i>V. mangachapoi</i> | GKASVLVADILNRMQTE | EEPVNSLDM       | TVPEINTLILIDRE | VDMVTPMCSQTYEGLLDEFL |
| <i>B. pendula</i>     | GKASVLVADILNRMQTE | EEPVNSLDM       | TVPEINTLILIDRE | VDMVTPMCSQTYEGLLDEFL |
| <i>O. rehderiana</i>  | GKASVLVADILNRMQTE | EEPVNSLDM       | TVPEINTLILIDRE | VDMVTPMCSQTYEGLLDEFL |
| <i>Q. robur</i>       | GKASVLVADILNRMQTE | EEPVNSLDM       | TVPEINTLILIDRE | VDMVTPMCSQTYEGLLDEFL |
| <i>F. sylvatica</i>   | GKASVLVADILNRMQTE | EEPVNSLDM       | TVPEINTLILIDRE | VDMVTPMCSQTYEGLLDEFL |
| <i>F. excelsior</i>   | GKASVLVADILNRMQTE | EEPVNSLDM       | TVPEINTLILIDRE | VDMVTPMCSQTYEGLLDEFL |

|                       |             |              |                  |                       |
|-----------------------|-------------|--------------|------------------|-----------------------|
| <i>S. robusta</i>     | HISNGAVELDT | SVMGVQOEGKMM | KVPLNSSDKLFKEIRD | INFEVVVQVLRQKATSMKQDY |
| <i>P. chinensis</i>   | HISNGAVELDT | SVMGVQOEGKMM | KVPLNSSDKLFKEIRD | INFEVVVQVLRQKATSMKQDY |
| <i>H. chinensis</i>   | HISNGAVELDT | SVMGVQOEGKMM | KVPLNSSDKLFKEIRD | INFEVVVQVLRQKATSMKQDY |
| <i>D. turbinatus</i>  | HISNGAVELDT | SVMGVQOEGKMM | KVPLNSSDKLFKEIRD | INFEVVVQVLRQKATSMKQDY |
| <i>V. mangachapoi</i> | HISNGAVELDT | SVMGVQOEGKMM | KVPLNSSDKLFKEIRD | INFEVVVQVLRQKATSMKQDY |
| <i>B. pendula</i>     | RINNGAVELDT | SVMGVQOEGKMM | KVPLNSSDKLFKEIRD | INFEVVVQVLRQKATSMKQDY |
| <i>O. rehderiana</i>  | RINNGAVELDT | SVMGVQOEGKMM | KVPLNSSDKLFKEIRD | INFEVVVQVLRQKATSMKQDY |
| <i>Q. robur</i>       | HVNGAVELDT  | SVMGVQOEGKMM | KVPLNSSDKLFKEIRD | INFEVVVQVLRQKATSMKQDY |
| <i>F. sylvatica</i>   | HVNGAVELDT  | SVMGVQOEGKMM | KVPLNSSDKLFKEIRD | INFEVVVQVLRQKATSMKQDY |
| <i>F. excelsior</i>   | GVNNGAVELDT | SVMGVQOEGKMM | KVPLNSSDKLFKEIRD | INFEVVVQVLRQKATSMKQDY |





i SMG1

*S. robusta* ..... MGEEQHOAPEQ..... QPESQVESAASEQS..... QKEYSWPVI  
*P. chinensis* ..... MGEEQHOAPEH..... QPESQVESTBASEQS..... QKEYSWPVI  
*H. chinensis* ..... MGEEQHOAPDH..... QPESQVESTBASEQS..... QKEYSWPVI  
*D. turbinatus* ..... MGEEQHOAPEH..... QPESQVESTBASEQS..... QKEYSWPVI  
*V. mangachapoi* ..... MGEEQHOAPEQ..... QPESQVESTBASEQS..... QKEYSWPVI  
*B. pendula* MSVTEAMGEEE.EEEKH..... QTNSPSGVAEITQAT..... QEDHSWPLI  
*O. rehderiana* MSATEAMGEEE.EEEKH..... QNSPSPSGVAEITRAT..... QEEHSSPVV  
*Q. robur* ..... MGQEEEEQENHNHNNHSESSES KSNSPSEVAEITEPTKDQEEQQQKEYSWPVI  
*F. sylvatica* MSVTEAMEEE... VENE..... QNSPSEVAEITEAT..... QKEYSWPVI  
*F. excelsior* ..... MGEEGADAHEHQ..... QPNPDET ESTE FETE TP..... SNGAYSWPLV

*S. robusta* SFDAPPRTYHFYQFRRT.SPNPNFLKGVKWSPDGSCFLASSDDNTLRIFSLPDNGSSD  
*P. chinensis* SFDAPPRTYHFYQFRRT.GPNPNFLKGVKWSPDGSCFLASSDDNTLRIFSLPDNGSSD  
*H. chinensis* SFDAPPRTYHFYQFRRT.SPNPNFLKGVKWSPDGSCFLASSDDNTLRIFSLPDNGSSD  
*D. turbinatus* SFDAPPRTYHFYQFRRT.SPNPNFLKGVKWSPDGSCFLASSDDNTLRIFSLPDNGSSD  
*V. mangachapoi* SFDAPPRTYHFYQFRRT.SPNPNFLKGVKWSPDGSCV LASADDNTLRIFSLPDNGSSD  
*B. pendula* RFDVPPRTYHFYHOFRT.GPNPNFLKGVKWSPDGSCFLTSSDDNTLRIFSLPDYGS GG  
*O. rehderiana* RFDVPPRTYHFYHOFRT.GSNPNFLKGVKWSPDGSCFLTSSDDNTLRIFSLPDYGS GG  
*Q. robur* RFDVPPRTYHFYHOFRT.SPNPNFLKAVKWSPDGSCFLTSSDDNTLRIFSLPDNGSS GG  
*F. sylvatica* QFDVLPRTYHFYHOFRT.APNPNFLKAVKWSPDGSCFLTSSDDNTLRIFSLPDNGSS GG  
*F. excelsior* HYDAHPRYTYHFYKOFRT.AASNPNFLKGVKWSPDGSCFLTCCDDNTLRIFSLPYDDSSIN

*S. robusta* YVNTNSSIPAEDSFAADLVVREGESVYDFCWYPYMSASDPVTCVFATPTRDHPHILWDA  
*P. chinensis* YVNTSSIPAEDSFAADLVVREGESVYDFCWYPYMSASDPVTCVFATPTRDHPHILWDA  
*H. chinensis* YVNTSSIPAEDSFAADLVVREGESVYDFCWYPYMSASDPVTCVFATPTRDHPHILWDA  
*D. turbinatus* NINTHSSVPAEDSFAADLVVREGESVYDFCWYPYMSASDPVTCVFATPTRDHPHILWDA  
*V. mangachapoi* YVNTSSVPPEDSFAADLVVREGESVYDFCWYPYMSASDPVTCVFATPTRDHPHILWDA  
*B. pendula* DVSTCSTASD EDSYAANLVVREGESVYDFCWYPYMSASDPVSCVFATPTRDHPHILWDA  
*O. rehderiana* DVSTWSTVSD EDSYAANLVVREGESVYDFCWYPYMSASDPVSCVFATPTRDHPHILWDA  
*Q. robur* DINTCSIAAD EDSYAANLVVREGESVYDFCWYPYMSASDPVSCVFATPTRDHPHILWDA  
*F. sylvatica* DVNTCSIAAD EDSYAANLVVREGESVYDL CWYPYMSASDPVSCVFATPTRDHPHILWDA  
*F. excelsior* YVNTCASAPD EDSYVANLVVREGESVYDYCWYPHMSASNDL CVYATPTRDHPHILWDA

*S. robusta* SGLRCTYRAYDAVDEITAAFSISFNPGTKIFAGYNKTI R VF DVHRPGRDFAOYSTLQG  
*P. chinensis* SGLRCTYRAYDAVDEITAAFSISFNPA GTKIFAGYNKTI R VF DVHRPGRDFAOYSTLQG  
*H. chinensis* SGLRCTYRAYDAVDEITAAFSISFNPA GTKIFAGYNKTI R VF DVHRPGRDFAOYSTLQG  
*D. turbinatus* SGLRCTYRAYDAVDEITAAFSISFNPA GTKIFAGYNKTI R VF DVHRPGRDFAOYSTLQG  
*V. mangachapoi* SGLRCTYRAYDAVDEITAAFSISFNPA GTKIFAGYNKTI R VF DVHRPGRDFAOYSTLQG  
*B. pendula* SGE LRCTYRAYDAMDEITAAFSIAFNPHG TKIFAGYNKAVR VFDHRPGRDFEOHSTLQG  
*O. rehderiana* SGE LRCTYRAYDAMDEITAAFSIAFNPHG TKIFAGYNKAVR VFDHRPGRDFEOHSTLQG  
*Q. robur* SGE LRCTYRAYDAMDEITAAFSIAFNPA GTKIFAGYNKTI R VF DVHRPGRDFEOHSTLQG  
*F. sylvatica* SGE LRCTYRAYDAMDEITAAFSIAFNPA GTKIFAGYNKTI R VF DVHRPGRDFEOHSTLQG  
*F. excelsior* SQGLRCTYRAYDAMDEITAAFSIGFNPSG TKIFAGYNSLRI R F DVHRPGRDFEOHSTLQR

*S. robusta* NKEGQTGIISALAFSPTHSGMLATGSYSQTTAIYKEDNMELLYILHGQEGGITHVQFSKD  
*P. chinensis* NKEGQTGIISALAFSPTHSGMLATGSYSQTTAIYKEDNMELLYILHGQEGGITHVQFSKD  
*H. chinensis* NKEGQTGIISALAFSPTHSGMLATGSYSQTTAIYKEDNMELLYILHGQEGGITHVQFSKD  
*D. turbinatus* NKEGQTGIISALAFSPTHSGMLATGSYSQTTAIYREDNMELLYILHGQEGGITHVQFSKD  
*V. mangachapoi* NKEGQTGIISALAFSPTHSGMLATGSYSQTTAIYREDNMELLYILHGQEGGITHVQFSKD  
*B. pendula* NKEGLAGIISALAFCPTEHTGLLAMGSYSQTTAIYTEDNMELLYVLHGHEGGVTHVQFSKD  
*O. rehderiana* NKEGLAGIISALAFCPTEHTGLLAMGSYSQTTAIYREDNMELLYVLHGHEGGVTHVQFSKD  
*Q. robur* NKEGQTGIISALAFCPTEHTGLLAMGSYSQTTAIYQEDNMELLYVLHGQEGGITHVQFSKD  
*F. sylvatica* NKEGQTGIISALAFCPTEHTGLLAMGSYSQTTAIYQEDNMELLYVLHGQEGGITHVQFSKD  
*F. excelsior* NKEGQSGIISALAFSPTHSGVLA TGSYSQTTAIYREDNMEPLYVLHGQEGGITHVQFSKD

*S. robusta* GNYLYTGGRKDPYIMCWDIRKAVEVVKLYRSTES TNQRIYFDIEPYGRYLG TGGDGDGV  
*P. chinensis* GNYLYTGGRKDPYIMCWDIRKAVEVVKLYRSTES TNQRIYFDIEPYGRYLG TGGDGDGV  
*H. chinensis* GNYLYTGGRKDPYIMCWDIRKAVEVVKLYRSTES TNQRIYFDIEPYGRYLG TGGDGDGV  
*D. turbinatus* GNYLYTGGRKDPYIMCWDIRKA.EVVYKLYRSTES TNQRIYFDIEPYGRYLG TGGDGDGV  
*V. mangachapoi* GNYLYTGGRKDPYIMCWDIRKAVEVVKLYRSTES TNQRM YFDIEPYGRYLG TGGDGDGV  
*B. pendula* GNYLYTGGRKDPYILCWDMRKAVDVVKLYRSEY TNQRIAFDIEPSSGRHLGTGGDGDGV  
*O. rehderiana* GNYLYTGGRKDPYILCWDIRKAVDVVKLYRSECTNQRILFDIEPLGRHLGTGGDGDGV  
*Q. robur* ..... DPYILCWDIRKAVDVVKLYRSECTNQRILFDIEPLGRHLGTGGDGDGV  
*F. sylvatica* GNYLYTGGRK..... DPYILCWDIRKAVDVVKLYRSECTNQRILFDIEPLGRHLGTGGDGDGV  
*F. excelsior* GNYLYTGGRKDPYILCWDIRNTVDIVYKLYRSSKD TNQRIQFDIEPLGRYLG TGGDGDGV



SMG1

|                       |              |               |            |          |              |          |
|-----------------------|--------------|---------------|------------|----------|--------------|----------|
| <i>S. robusta</i>     | HIYDLQTGWISG | YQAAADTVNGFN  | FHPFLPMAAS | SSGHRRFQ | IPEEDTEELF   | ..LRGDE  |
| <i>P. chinensis</i>   | HIYDLQTGWISG | VQAAADTVNGFT  | FHPFLPMAAS | SSGHRRFQ | IPEEDTEEVF   | ..LRGDE  |
| <i>H. chinensis</i>   | HIYDLQTGWISG | FQAAADTVNGFT  | FHPFLPMAAS | SSGHRRFQ | IPEEDTEELF   | ..LRGDE  |
| <i>D. turbinatus</i>  | HIYDLQTGWISG | FQAAADTVNGFT  | FHPFLPMAAS | SSGHRRFQ | IPEEDTEELF   | ..LRGDE  |
| <i>V. mangachapoi</i> | HIYDLQTGWISG | FQAAADTVNGFT  | FHPFLPMAAS | SSGHRRFQ | IPEEDTEELF   | ..LRGDE  |
| <i>B. pendula</i>     | HIYDLQTGHVVS | SFHAALDTVSGFS | FHPFLPMAAS | SSGHRRFV | VPDDTYEDMPLT | LSGNE    |
| <i>O. rehderiana</i>  | HIYDLQTGHVVS | SFHAALDTVSGFS | FHPFLPMAAS | SSGHRRFV | VPDDTYEDMPLT | LSGNE    |
| <i>Q. robur</i>       | HIYDLQTGHVVS | SFQAASDTVSGFS | FHPFLPMAAS | SSGHRRFV | VPDDLYEDVP   | ..LSGNE  |
| <i>F. sylvatica</i>   | HIYDLQTGNWVS | SFQAALDTVSGFS | FHPFLPMAAS | SSGHRRFV | VPDDVSEDI    | P..LSVLL |
| <i>F. excelsior</i>   | HIYDLQTGWVVS | SFQAALDTVNGFA | FHPFLPMAAS | SSGHRRFG | GLDDFQENMD   | ..LSGDE  |

|                       |              |             |             |              |            |       |
|-----------------------|--------------|-------------|-------------|--------------|------------|-------|
| <i>S. robusta</i>     | NCASVWSFSYTS | MAESGVGMNAD | HAKKSVGGAES | HVHYLPMYVLNS | ICVIGFQANL | HPSH  |
| <i>P. chinensis</i>   | NCASVWSFSYTS | MAESGVGMNAG | DFNS        | .....        | QSENGN     | IHCDS |
| <i>H. chinensis</i>   | NCASVWSFSYTS | IADSGVGMNTG | DFNK        | .....        | QPENED     | IHCDS |
| <i>D. turbinatus</i>  | NCASVWSFSYTS | MAESGVGMNAS | DFNS        | .....        | QSENE      | IHRDS |
| <i>V. mangachapoi</i> | NCASVWSFSYTS | MAESGVSKNAG | DFL         | .....        | QSENE      | VHCDS |
| <i>B. pendula</i>     | NCASVWSFSIPT | MVNDTEIKGD  | SNS         | .....        | LSHENL     | QHDP  |
| <i>O. rehderiana</i>  | NCASVWSFSIAS | TVNDEITNGD  | SNC         | .....        | PSEHENL    | HHDP  |
| <i>Q. robur</i>       | NCASVWNFSVAS | VNDETELN    | GNDFNN      | .....        | LSEHEE     | LHQGP |
| <i>F. sylvatica</i>   | ICGIFLKYLFG  | .....       | .....       | .....        | .....      | ..... |
| <i>F. excelsior</i>   | NCASVWSFSCS  | STSDTS      | SI          | ESGN         | .....      | ..... |



PPP2R5

*S. robusta* .VETQELRRTSVGRPLRHVVVEKADNKRVLSSRRKSTRLQSQVPEPTEDVLEMD EAKYR...  
*P. chinensis* .VETQELRRTSVGRPLRHVVVEKADNKRVLSSRRKSTRLQSQVAEPTEDVLEMD EAKYH...  
*H. chinensis* .IETQELRRTSIGRPLRHVVVEKADNKRVLSSRRKSTRLQSQVPEPTEDVLEMD EAKYD...  
*D. turbinatus* .VETQELRRTSVGRPLRHVVVEKADNKRVPSSRRKSTRLQSQVPEPTEDVFEIDDTKFP...  
*V. mangachapoi* .VETQELRRTSVGRPLRSMVDKADNKRVLSSRRKSTRLQSQVPEPTEDVLEMD EAKSH...  
*B. pendula* QSENQSLGSLTVEPI.HAKENVENKR.CLRROSTFFKSEES EPTEDLIEIDKASGPTIVK  
*O. rehderiana* QSENQSLGSLTAEPV.HAKENVENKR.RLRROSTFFKSEES EPTEDI.EIDKASAPTIVK  
*Q. robur* .....HAKENVENKR.RLRROSTFFKSEES EPTEDI.EIDKASAPTIVK  
*F. sylvatica* .....HAEIIVRNKR.RLRROSTFFKSEES EPTEDI.EIDKASAPTIVK  
*F. excelsior* .....QSMSTKTEKRS.SVRRROSTFFKSEES EPTEDI.EIDKASAPTIVK

*S. robusta* ISPLHEETLHLNVPVLSGSSVQKEQEQGNRATGVKTRLELRTSVGRPLCDVVEKADNKRVP  
*P. chinensis* VSPLEETLHLNVPVLSGSSVQKEQEQGNRATGVKTRLELRTSVGRPLHDVVEKADNKRVP  
*H. chinensis* VSPLEETLHLNVPALS GSSVQKEQEQGNRATGVKTRLELRTSVGRPLHDVVEKADNKRVP  
*D. turbinatus* ISSLHEEALHLNVPASSGSSLQKEQEQGNRAKGVETQELRTSVRRPSCDVVEKADNKRVP  
*V. mangachapoi* VSPLEETLPLNVPSSVSSLRKEQE.GNGATGVETQELRTSVGRPLCGVVEKADNKRVP  
*B. pendula* LVPTKEHVDNKR.PSRRQSARFKSEEPGPIEDLFEIDKASSPTTLKPVHAKESIGN...  
*O. rehderiana* LVHTREHFDKRRQHSRRQSARFKSEEPGPIEDLFEIDKASSPTTLKPVHAKESIGN...  
*Q. robur* .....  
*F. sylvatica* .....  
*F. excelsior* .....

*S. robusta* SKRKSSTRLQSQVPEPTEDVFEIDDTKFPISSLHEEMVHVNVPASSASSTPKEEQGGINAP  
*P. chinensis* SKRKSSTRLQSQVPEPTEDVFEIDDTKFPISSLHEEMVHVNVPASSVSTPKEEQGGINVP  
*H. chinensis* SKRKSSTRLQSQVPEPTEDVFEIDDTKFPISSLHEEMVHVNVPASSVSTPKEEQGGINVP  
*D. turbinatus* SKRKSSTRLQSQVPEPTEDVFEIDDTKFPISSLHEEALHLNVPASSGSLQKEER.GINAP  
*V. mangachapoi* SKRKSSTRLQSQVPEPTEDVFEIDDTKFPISSLHEEMVHVNVPASSVSTPKEEQGGINAP  
*B. pendula* .KRQSARSKSEEPQEDFEIYDAKFPVSPLLDDSVHETSQMALALSIEKEDDE.GNTALH  
*O. rehderiana* .KRQSARSKSEEPQEDFEIYDAKFPVSPLLDDSVHETSQMALALSIEKEDDE.GNTAL  
*Q. robur* .....EPEQTEDFEIDSAKFPVSPVHDDLVEHSGQMLSGLSVKEDEDE.GNTAL  
*F. sylvatica* .....EPEQTEDFEIDSAKFPVSPVHDDLVEHSGQMLSGLSVKEDEDE.GNTAL  
*F. excelsior* .....EKEPAEEDLFEITCDAREPVCSLPDDTVLENDISLVSAAVKNQEVKECVPA

*S. robusta* EGEVQELRRRTSVGRPLRRAAEKVQSYKEIPLVKMRRPE...  
*P. chinensis* EGEVQELRRRTSVGRPLRRAAEKVQSYKEIPLNVKMRRE...  
*H. chinensis* GGEVQELRRRTSVGRPLRRAAEKVQSYKEIPLNVKMRRE...  
*D. turbinatus* GGEVQELRRRTSVGRPLRRAAEKVQSYKEIPLNVKMRRE...  
*V. mangachapoi* EGEVQELRRRTSVGRPLRRAAEKVQSYKEIPLNVKMRRE...  
*B. pendula* SLBAQEIIRRSVGRPLRRAAEKIQSYKEISINVKMRRLE...  
*O. rehderiana* SLBAQEIIRRSVGRPLRRAAEKIQSYKEIPLNVKMRRE...  
*Q. robur* RFESQEIIRRSVGRPLRRAAEKVQSYKEIPLNVKMRRE...  
*F. sylvatica* RLBAQEIIRRSVGRPLRRAAEKVQSYKEIPLNVKMRRE...  
*F. excelsior* RYEPQKFGRSLSLGRPSRQAAIKVQSYKEIPLNVKMRRE...







SKI3

*S. robusta* SARNSYQRALNLPWQANIYTDIATSSDLISSLKGDHEYIQNAWOLPEKMGALGALLEGD  
*P. chinensis* SARNSYQRALNLPWQANIYTDIATSSDLISSLNGDHEYIQNAWOLPEKMGALGALLEGD  
*H. chinensis* SARNSYQRALNLPWQANIYTDIATSSDLISSLNGDHEYIQNAWOLPEKMGALGALSLEGE  
*D. turbinatus* SARNSYQRALNLPWQANIYTDIATSSDLISSLNGDHEYIQNAWRPEKMGALGALLEGD  
*V. mangachapoi* SARNSYQRALNLPWQANIYTDIATSSDLISSLNGDCEYIQNAWOLPEKMGALGALLEVD  
*B. pendula* SAKCSYQRALHMAPWQANIYTDIATASDLISSLNKSYGNLNAWOLSEKMGALGALLEGD  
*O. rehdieriana* SAKHSYQRALHLPWQANIYTDIATASDFISLNLKSYENLNAWOLSAKMGALGALLEGD  
*Q. robur* SAKCSYQRALHLPWQANIYTDIATADLISSLTMSDGNDFNDWOLSEKMGALGALLEGD  
*F. sylvatica* SARCSYQRALHLPWQANIYTDIATITDLISSLTKSVGNVNAWOLSEKMGALGALLEGD  
*F. excelsior* SASRSYQRALHLPWQANIYTDIATASDINFLSKEDPNGLNAWOLSAKMGALGALLEGH

*S. robusta* NSVFWIVLGLCSNQQALRQHALIRGLQLDVSLAIAWANLGGKLYREDEKKLARQAFDCAR  
*P. chinensis* NSEFWIVLASLNNQALRQHALIRGLQLDVSLAIAWANLGGKLYREDEKKLARQAFDCAR  
*H. chinensis* NSEFWIVLGLCSNQQALRQHALIRGLQLDVSLAIAWANLGGKLYRENEKKLARQAFDCAR  
*D. turbinatus* NSEFWIVLGLCSNQQALRQHALIRGLQLDVSLAIAWANLGGKLYRENEKKLARQAFDCAR  
*V. mangachapoi* NSEFWIVLGLCSNQQALRQHALIRGLQLDVSLAIAWANLGGKLYRENEKKLARQAFDCAR  
*B. pendula* NIEFWVALGCLSDHDALQHALIRGLQLNVSLAVGWAYLGGKLYRKGAKQLAKQTFDCAR  
*O. rehdieriana* NNEFWVALGCLSDHSALKQHALIRGLQLDVSLAVGWAYLGGKLYRKGAKQLAKQAFDCAR  
*Q. robur* NYEFWVALGCLSDHNALKQHALIRGLQLDVSLAVGWAYLGGKLYREGENQLARKAFDCAR  
*F. sylvatica* NYEFWVALGCLSDHNALKQHALIRGLHLDVSLAVGWAYLGGKLYREGANQLARKAFDCAR  
*F. excelsior* NYEFWVALGCLSNHIELKQHSIRGLHLDVSLAVAWAYLGGKLYRQEGEKQLAQAFDRAR

*S. robusta* SIDPSLALPWAGMSADADVRESTLDEAFESCLRAVOILPLAEFQIGLAKFALLSGHLLSS  
*P. chinensis* SIDPSLALPWAGMSADADVRESTLDEAFESCLRAVOIFPLAEFQIGLAKFALLSGHLLSS  
*H. chinensis* SIDPSLALPWAGMSADADVRESTLDEAFESCLRAVOIFPLAEFQIGLAKFALLSGHLLSS  
*D. turbinatus* SIDPSLALPWAGMSADADVRESMLGEAFENCLRAVOIFPLAEFQIGLAKFALLSGHLLSS  
*V. mangachapoi* SIDPSLALPWAGMSADADARESTLDEAFESCLRAVILPLAEFQIGLAKFALLSGHLLSS  
*B. pendula* SIDPSLALPWAGMSADFHARDLAPDEAFESCLRAVOILPLAEFQIGLAKFALLSGHLLSS  
*O. rehdieriana* SIDPSLALPWAGMSADFHARNLAPDEAFESCLRAVOIFPLAEFQIGLAKFALLSGHLLSS  
*Q. robur* SIDPSLALPWAGMSADFNARDPSPDEAFESCLRAVOIFPLAEFQIGLAKLAFSGHLLSS  
*F. sylvatica* SIDPSLALPWAGMSADFHARDPSPDEAFESCLRAVOIFPLAEFQIGLAKLAFVSGHLLSS  
*F. excelsior* SIDPSLALPWAGMSADADSRKCLKPDEAYECCLLAVOIFPLAEFQIGLAKLALQSGYLLQSS

*S. robusta* QVFGAIQQAVORTPHYPESHNLNGLVREARFVYQAAVSSYRLARFAISSITDPKSHLR  
*P. chinensis* QVFGAIQQAVORTPHYPESHNLNGLVREARFVYQAAVSSYRLARFAISSITDPKSHLR  
*H. chinensis* QVFGAVQQAVORTPHYPESHNLNGLVCEARFVYQAAVSSYRLARFAISSITDPKSHLR  
*D. turbinatus* QVFGAIQQAVORAPHYPESHNLNGLACEARFVYQAAVSSYRLARFAISSITDPKTHLR  
*V. mangachapoi* QVFGAIQQAVORTPHYPESHNLNGLVCEARFVYQAAVSSYRLARFAVSLSAGTDPKSHLR  
*B. pendula* LVLGAIQQAVOHAPHSPESHNLNGLVCEARFDYQSAAAAYRRARCAISSCSASISKSHTR  
*O. rehdieriana* QVFGAIQQAVOHAPHSPESHNLNGLVCEARFDYQSAAAAYRRARCAISSCSASISKSHTR  
*Q. robur* QVFGAIQQAVOHAPHYPESHNLNGLVCEARFDYQSAAAAYRLARCAICSPFDSVPKSHTR  
*F. sylvatica* QVFGAIQQAVOHAPHYPESHNLNGLVCEARFDYQSAAAAYRLARCAICSPFDSVPKSHTR  
*F. excelsior* EVFGAIRHALORAPHYPESHNLNGLVCEARFDYQSAAITSYRLARCAIRYFAGELSVSFLK

*S. robusta* DISINLARSRLCRAGNAIDAVQECEDLKEKGLLDAEGLQIYAFSLWQLGKHELAI SVTRTL  
*P. chinensis* DISINLARALCRAGNAIDAVQECEDLKEKGLLDVEGLQIYAFSLWQLGKHELAIYVTRTL  
*H. chinensis* DISINLARSRLCRAGNAIDAVQECEDLKEKGLLDTEGLQIYAFSLWQLGKHELAI SVTRTL  
*D. turbinatus* DISINLARSRLCRAGNAIDAVQECEDLKEKGLASL.....  
*V. mangachapoi* DISINLARSRLCRAGNAIDAVQECENLKEIEGLDTEGLQIYAFSLWQLGKHELAI SVTRTL  
*B. pendula* DISINLARSRLCRAGNAIDALLECELNKEGMLDAEGLQIYAFSLWQLGKQDLALSVRNL  
*O. rehdieriana* DVSINLARSRLCRAGNAIDALLECEDLKEKGLDAEGLQIYAFSLWQLGKQDLALSFRNL  
*Q. robur* DISINLARSRLCRAGNAIDALLECEDLKEKGLDVEGLQVYAFSLWKLDKRDLALSVRNL  
*F. sylvatica* DISINLARSRLCRAGNALDALQECEDLKEKGLDVEGLQIYAFSLWKLDKRDLALSVRNL  
*F. excelsior* DISINLARSRLCRAGNVIDAVEECESLKHKGLLDTEGLHIYALSLSLWQLGKNDLALSVRTAL

*S. robusta* AASVSTMDRTAAGASVSFICRLLYYISGLDSAIN SILKMPKELFQSSKISFVMSAIHALD  
*P. chinensis* AASVSTMDQTAAGASVSFICRLLYYISGLDSAIN SILKMPKELFQSSKISFVVSIAHALD  
*H. chinensis* AASVSTMDRTAAGASVSFICRLLYYISGLDSAIN SILKMPKELFQSSKISFVVSIAHALD  
*D. turbinatus* .....  
*V. mangachapoi* AASVSTMEWTAAGASVSFICRLLYYISGLDSAIN SILKMPKELFQSSKISFVVSIAHALD  
*B. pendula* ALSVSTMEQKSVAAAPVSFICRMLYICISGLDSAISSILKMPKELFQSSGVSFVVSIAIHALD  
*O. rehdieriana* AASVSTMEQKSVAAASVSFICRMLYICISGLDSAISSILKMPKELFQSSRVSFVVSIAIHALD  
*Q. robur* AASVSAMEQTSVAAAPVSFICRMLYIFMSGLDSAISSILKMPKELFQSSKISFVVSIAHTLD  
*F. sylvatica* AVRVSAMEQTSVAAAPVSFICRMLYIISGLDSAISSILKMPKELFQSSGVSFVVSIAHTLD  
*F. excelsior* AAGILSMEQKLAASVSFLICRLLYYISGQESAIT SILKMPKELFQSSKISFVVSIAHVLD



SKI3

*S. robusta* QSNRLESVSVSSRY YLSSHEEITGMHYLIALNLIKHGLEDHLGFQSAVGHLRKALHMYP  
*P. chinensis* QSNRLESVSVSSCCYLSSHEEITGMHYLIALNLIKHGLEDHLGFQSAVGHLRKALHKYP  
*H. chinensis* QSNRLESVSVSSRY YLSSHEEITGMHYLIALNLIKHGLEDHLGFQSAVGHLRKALHMYP  
*D. turbinatus* .....  
*V. mangachapoi* QSNRLESVSVSSRY YLSSHEEITGMHYLIALNLIKNGLEDHLGFQSAVGHLRKALHMYP  
*B. pendula* QSNRLESVSVSSRSFVQSPVEVAGMHFMIALSKVVKHGTEFCLGVQSGVAHLRKLALHMF  
*O. rehderiana* QSNRLESVSVSSRSIVQSPVEVAGMHFMIALSKLVKQGTEFCLGVQCGIAHLRKLALHMF  
*Q. robur* TCDRLFPVSVSSRRFLTSHEEITGMHYLIALGKLVKHGTEFCLGFQSGVAHLRKLALHMYP  
*F. sylvatica* ICNRLESVSVSSRCFLTSPVEEITGMHYLIALGKLVKHGTEFCLGFQSGVAHLRKLALHMYP  
*F. excelsior* QNDQLESVSVSSRS SVTSD E E I T A M H T L I A V G K L V K H G S K D C L A T Q R G V D H L R K A L H K Y P

*S. robusta* NSVLLRNLG Y L L L L S E D W N T H V S S R C S I I D S S D Y . . K E G L K S A W E I I G A G A V A C H V L C  
*P. chinensis* NSVLLRNLG Y L L L L S E D W N T H V S S R C S I I D A S D Y . . K E G L K S A W E I I G A G A V A C Y V L C  
*H. chinensis* NSVLLRNLG Y L L L L S E D W N T H V S S R C S I I D A S D Y . . K E G L K S A W E I I G A G A V A C Y V L C  
*D. turbinatus* .....  
*V. mangachapoi* NSVLLRNLG Y L L L L S E D W N T H V S S R C S I I D A S D H . . K E G L K S A W E I I G A G A V A C Y V L G  
*B. pendula* NSSLMRNLG Y L L L S S K E W N D T H V A T R C N I D A S D C A K E G L K S A S E I L G A G A V A C Y A I G  
*O. rehderiana* NSSLMRNLG Y L L L S S K E W N D T H V A T R C N I D T S D C A N K E G L K S A S E I L G A G A V A C Y A I G  
*Q. robur* NSSLRNLG Y L L L S S K E W N D T H V A T R C N V D S T N Y Q N K G G L K S A S E I L G A G A V A C Y A V G  
*F. sylvatica* NSSLRNLG Y L L L S S K E W N D T H V A T R C N V . S T D R Q N K E G L K S A S E I L G A G A V A C Y A V G  
*F. excelsior* NSVLLRNLG Y L L L S S K E Q R D L Y L A T R C S F I D L S D H K K E E G L K S A S E I V G A G T V A C Y S T G

*S. robusta* NREPKFSFPTCSYQCLNGP GSTKELQKCLRREPWNHNVR YLLVLNL LQKAREERFPV HLC  
*P. chinensis* .....  
*H. chinensis* NREPKFSFPTCSYQCLNGSESIKELQKCFRREPWNHNPQ YLLVLNL LQKAREERFPV HLC  
*D. turbinatus* .....  
*V. mangachapoi* NREPKFSFPTCSYRCLNGSGSIKELQKCFRREPWNHNAQ YLLVLNL LQKAREERFPV HLC  
*B. pendula* NKNPKFSFPTCTYQCLKAPGAIQQLQKCLRREPWNHNVR YLLVLNL LQKAREERFPV HLC  
*O. rehderiana* NKNRPFSPPTCTYQCLKAPGAIQQLQKCLRREPWNHNVR YLLVLNL LQKAREERFPV HLC  
*Q. robur* NSNPKFSFPTCTYQCLNGHGAIQQLQKCLRREPWNHNVR YLLVLNL LQKAREERFPV HLC  
*F. sylvatica* NSNPKLSFPTCTYQCLNEP GAIQQLQ . . . . .  
*F. excelsior* SYNGRFSFPTCRPQWPSGSGAIRLQKNLHQEPWNLNR YLLTVNY LQKAREERFPV HIC

*S. robusta* TILERLIALSLSNEFYSGKDISCLYQKFQLLCASEICLQGGNIAGCINLAKNASALFLP  
*P. chinensis* .....  
*H. chinensis* TILERLIALSLSNEFYSGKDISCRYQKFQLLCASEICLQGGNIAGCINHAKNASALFLP  
*D. turbinatus* TILERLIALSLSNEFYSGKDTSCLYQKFQLLCASEICLQVGNIAADCINHAKNASALFLP  
*V. mangachapoi* TILERLIALSLSNEFYSGKDISCLYQKFQLLCASEICLQGGNIADCVNHAKNASALFLP  
*B. pendula* IVLKRLLISVALSSDLYTKTDMSS . . YQKFQLLCASEISLQSEDNIGCVNHAKNASL L L L P  
*O. rehderiana* IVLKRLLISVALSSDLYTKTDMSS . . YQKFQLLCASEISLQSEDNIGCVNHAKNASL L L L P  
*Q. robur* IILKRLLMSVALPSEVYSKTDMC . . YQKFQLLCASEISLHSGNKTG CIDHAKNASK L L L P  
*F. sylvatica* . . . . . NEVYSKTDMC . . YQKFQLLCASEISL YSGNKIGCINHAKNASK L L L P  
*F. excelsior* LVLERLVAVALSNSQSYSRKDLSSQYMFHLLLCAAEVSLQGGNHSECLKHARLATGLSVH

*S. robusta* ESYLFFGHLLLCRAYAAEGNCMNLQOEYK KCLELKTDFHVGWGLCKVIESQYNLQSGSNT  
*P. chinensis* .....  
*H. chinensis* ESYLFFGHLLLCRAYAAEGNFMNVQOEYK KCLELKTDFHVGWGLCKVIESQYNLQSGSNT  
*D. turbinatus* ESYLFFGHLLLCRAYAAEGNFMNLQOEYENCLLELKTDFHIGLGLCKVIESQYKLOTGSNT  
*V. mangachapoi* ESYLFFGHVLCRAYAAEGNFMNLQOEYK KCLELKTDFHVGWGLCKVIECQYKLOTGSNT  
*B. pendula* DDYLFSSHLLQCRAYAAESDSLNIQKEYIRCLELKTDFHIGWGLCKVIEELRYNVQNDANI  
*O. rehderiana* DDYLFSSHLLQCRAYAAESDSLNIQKEYIRCLELKTDFHIGWGLCKVIEELRYNVQNDANI  
*Q. robur* DAYLFFSHLLQCRAYAVEGDIINLQKEYIRCLELKTDFHIGWGLCKVIESQYHVQTDLNI  
*F. sylvatica* DAYLFFSHLLQCRAYAVEGDIINLQKEYLRCLELRTDFHIGWGLCKLLESQYHVQTDLNI  
*F. excelsior* NSSLFFVHLLLCRAYAAENNI VSLTEYRRCMELRTDSHIGWGLCKVIESRYRLQNDSTI

*S. robusta* IELSLNECSRGSNSWNMMAVSVLGLIC IWNQDFLSAEFLQHACSLAGADSCFFLC  
*P. chinensis* .....  
*H. chinensis* IELSLNECSRGSNSWNMMAVSVLGLLGIWNQDFLSAEFLVQACSLAGADSCFFLC  
*D. turbinatus* IELSLNECSRGSNSWNMMAVSVLGMIC IWNQDFLSAEFLVQHACSLGGAESCFFLC  
*V. mangachapoi* IELSLNECSRGSNSWNMMAVSVLGLICTWNQDFLSAEFLVQHACSLAGADSCFFVC  
*B. pendula* LELSFKESSKERNYSWNMMAVFNLVWGLISLWNEDFLSAEFLTQACSLAGAESCLFLC  
*O. rehderiana* LELSFKESSKERNYSWNMMAVFNLVWGLISLRNEDFLSAEFLAQACSLAGAESCLLLC  
*Q. robur* LDLCFKESSTERDYNSWNMMAIFNLVWGLIS IWNQDFLSAEFLAQACSLAGAESCLFLC  
*F. sylvatica* LELSFKEYSKERNYSWNMMAVFNLVWGLIS IWNQDFLSAEFLAQACSSAGAESCLFLC  
*F. excelsior* LALNFEESKDIKNNSWNMMAVFDLVQGLIAMWSGDFI GAEEFLMQACSSAGGESCFFLC



SKI3

|                       |                                                               |
|-----------------------|---------------------------------------------------------------|
| <i>S. robusta</i>     | HGAICMELARQFNDSSEFLSHAVRSLKKAQTTSFIPIPLVALLAQAEASLGSKGKWEKLE  |
| <i>P. chinensis</i>   | .....                                                         |
| <i>H. chinensis</i>   | HGAICMELARQFNDSVFLACAVRSLKKAQTTSFIPIPLVALLAQAEASLGSKGKWEENL   |
| <i>D. turbinatus</i>  | HGAISMELARQFNDSSEFLSHAVRSLKKAQTTSFILTPLVAVLLAQAEASLGSKGKWEKNL |
| <i>V. mangachapoi</i> | HGAICMELARQFNDSSEFLSRAIRSLKKAQTTSFIPIPLVAVLLAQAEASLGSKGKWEKNL |
| <i>B. pendula</i>     | HGATCMELARQLRDSKFLSLAVKSLAKAQEASVIPLEPVSALLAQAEASLGSKGKWEKNL  |
| <i>O. rehderiana</i>  | HGATCMELARQLRDSKFLSLAVKSLAKAQEASVIPLEPVSALLAQAEASLGSKGKWEKNI  |
| <i>Q. robur</i>       | HGAICMELARQSRGSGQFLSLAVKSLTEAQKTSLIPLEPVSALLAQAEASLGSKGKWEKNI |
| <i>F. sylvatica</i>   | HGAICMELARQSSGSGQFLSLAVKSLTEAQKTSLIPLEPVSALLAQAEASLGSKGKWEKNI |
| <i>F. excelsior</i>   | HGAICMELARQHCDKYSLSAIRSLKKAQETSSTPLPIMSALLAQAEASLGSMPEKWKDNL  |

|                       |                                                              |
|-----------------------|--------------------------------------------------------------|
| <i>S. robusta</i>     | RLEWISWPPVECLIDPWFMMIKKFIAIDIKSHVANYSSNVFYVSPLEMRHAELFFQMHLA |
| <i>P. chinensis</i>   | .....PK.....                                                 |
| <i>H. chinensis</i>   | RLEWISWPP.....GLGIARTSMLF.....                               |
| <i>D. turbinatus</i>  | RLEWISWPP.....EMRHAELFFQMHLA                                 |
| <i>V. mangachapoi</i> | RLEWISWPP.....EMRHAELFFQMHLA                                 |
| <i>B. pendula</i>     | RLEWFSWPP.....EMRPAELFFQMHLA                                 |
| <i>O. rehderiana</i>  | RLEWFSWPP.....EMRPAELFFQMHLA                                 |
| <i>Q. robur</i>       | RLEWFAWPP.....EMRPAELFFQMHLA                                 |
| <i>F. sylvatica</i>   | RLEWCSWPP.....EMRPAELFFQMHLA                                 |
| <i>F. excelsior</i>   | QDEWFSWPP.....ETRPAELFFQMHLF                                 |

|                       |                                                |
|-----------------------|------------------------------------------------|
| <i>S. robusta</i>     | RQLEARTDSSSRVECCQSELRQVVVRAIHTNPSARYWKVLRRLAS  |
| <i>P. chinensis</i>   | .....IESELSI.....                              |
| <i>H. chinensis</i>   | .....LEVTKSE.....CSIACIWHSKHLSKLF.             |
| <i>D. turbinatus</i>  | RQLEASTDSSSRVECCQSELRQVVVRAIHTNPSARYWKVLRRLAS  |
| <i>V. mangachapoi</i> | RQLQAGTDSSSRVECCQSELRQVVVRAIHTNPSARYWKVLRRLTS  |
| <i>B. pendula</i>     | RQSKSMISSSNVEFCQSELRWILRAIHTNPSCIIRYWKVLQKLLT  |
| <i>O. rehderiana</i>  | RQSKSVSISSSNAELCQSELRWILRAIHTNPSCIIRYWKVLQKLV. |
| <i>Q. robur</i>       | RQSKSDPKSPSNVEFCQSELRWILRAIHTNPSCIIRYWKVLQKLMT |
| <i>F. sylvatica</i>   | KQSKSGPNTSAHVESYQSELRWILRAIHTNPSCIIRYWKVLQKLI  |
| <i>F. excelsior</i>   | KQLK...ESSSESDSCQSELRWILRAIHTNPSCLRYWKVLQKNRE  |





m APX

*S. robusta* . . . . . ASRCITRA . . . . . VLIRCNKIE TD DVLGSGE SCFR RDALRVAGATIGMELLASSGS  
*P. chinensis* . . . . . ANRCITRA . . . . . VFIRCNKIEAD DVFVSAE SCFR RDVLRVAGATIGMELLASSGS  
*H. chinensis* . . . . . ANRCITRA . . . . . VFIRCNKIE TD DVFVSGE SCLR RDVLRVAGATIGMELLASSGS  
*D. turbinatus* . . . . . ANRCISRA . . . . . VFIRCDKIE TD DVSCSGE SCFR RDVLRVAGATIGMELLASSGS  
*V. mangachapoi* . . . . . ANRCITRA . . . . . VFI G CNKIEAD DVSGAGE SCFR RDVLRVAGATIGMELLASSGS  
*B. pendula* ATIAAA TRY TSHA . . . . . VTIRCYKMET. GVTAEDE DRFRREILKCFGV TIGMELMSSGS  
*O. rehderiana* ATIAAA TRY PSHA . . . . . VTIRCYKMET. GVTAEDE DRFCRRDILKCFGV TIGMELMSSGS  
*Q. robur* TT . . . . . TNRYPSYAKYQV TVRCNKMET. DATAEDE DRFCRRDILKCFGV TIGMELMSSGL  
*F. sylvatica* TSTSS TTRYPSHA . . . . . TVRCNKMEI. DVTAGDE DRFCRRDILKCFGV TIGMELMSSGS  
*F. excelsior* . . . . . LSRCSPHS . . . . . GVINC. KIEA. HVNSAD. . . . . GFSRRDILHCFGATISMDLIARST

*S. robusta* FIETASAADLIQRRORS EFLSSIKGTLT TATEGTPDVI PSILTLALNDAMTYDQATKSSGG  
*P. chinensis* FIETASAADLIQRRORS EFLSSVKGTLAMATEGTPDLI PSLTLALNDAMTYDKATSSGG  
*H. chinensis* FIETASAADLIQRRORS EFLSSVKGTLT TATEGTPDLI PSLTLALNDAMTYDKATSSGG  
*D. turbinatus* FIETASAADLIQRRORS EFLSSVRCGLT TATEGTPDLI PSLTLALNDAMTYDKATSSGG  
*V. mangachapoi* FTETASAADLIQRRORS EFLSSVKGTLVAATEGTPDLI PSLTLALNDAMTYDKATSSGG  
*B. pendula* FVEKASAADLIQLRORS EFLSSVKGTLSTAIKSPDLI PSLTLALNDGIMTYDKATSSGG  
*O. rehderiana* FVEKASAADLIQLRORS EFLSSVKGTLSTAIKSPDLI PSLTLALNDIMTYDKATSSGG  
*Q. robur* FVEKASAADLIQRRORS EFLSSVKGTLFTAINGNVELL PSLTLALNDAMTYDKATSSGG  
*F. sylvatica* FVEKASAADLIQRRORS DFNQSNIKGTLSTAIENGTDLI PSLTLALNDATYDKATSSGG  
*F. excelsior* FVEVA NAADLIQRRORS EFLQSAIKGTF AESFRGNPDLI PS . . . . . ATKSSGG

*S. robusta* PNGSIHFSSEISRPNKGLSAAALRLLEDAKKEIDSFSKGGPISFADLIQYAAQSAIKATF  
*P. chinensis* PNGSIRFSSSEISRPNKGLSAAALRLLEDAKKEIDSYSKGGPISFADLIQYAAQSAIKATF  
*H. chinensis* PNGSIHFSSEISRPNKGLSAAALRLLEDAKKEIDSYSKGGPISFADLIQYAAQSAIKATF  
*D. turbinatus* PNGSIHFSSEISRPNKGLSAAALSLEDAKKEIDSYSKGGPISFADLIQYAAQSAIKATF  
*V. mangachapoi* PNGSIHFSSEISRPNKGLSAAALSLEDAKKEIDSYSKGGPISFADLVQYAAQSAIKATF  
*B. pendula* PNASIRFSSSEISRPNKGLSAAANLLEEAkkeIDSYSKGGPISYADLIQYAAQSAIKATF  
*O. rehderiana* PNASIRFSSSEISRPNKGLSAAANLLEEAkkeIDSYSKGGPISYADLIQYAAQSAIKATF  
*Q. robur* ANGSIRFSSSEISRPNKGLSAAANLLEEAkkeIDSYSKGGPISYADLIQYAAQSAIKATF  
*F. sylvatica* PNGSIRFSSSEISRPNKGLSAAANLLEEAkkeIDSYSKAGPISYADLIQYAAQSAIKATF  
*F. excelsior* PNGSIRFSSSEISRPNKGLSAAANLLEEVKKEIDSYSKGGPISYADLIQYAAQSAIKSTF

*S. robusta* LASAIRKCGGNEEKGRFLYTAFGSNGQWGLFDKQFGRDTTEEPDPEGRIPLWEKASVQEM  
*P. chinensis* LASAIRKCGGNEEKGRLLYTAYGSSGQWGLFDKQFGRDTTEEPDPEGRIPLWEKASVQEM  
*H. chinensis* LASAIRKCGGNEEKGRLLYTAYGSSGQWGLFDKQFGRDTTEEPDPEGRIPLWEKASVQEM  
*D. turbinatus* LASAIRKCGGNEEKGRLLYTAYGSSGQWGLFDKQFGRDTTEEPDPEGRIPLWEKASVQEM  
*V. mangachapoi* LASAIRKCGGNEEKGRLLYTAYGSSGQWGLFDKQFGRDTTEEPDPEGRIPLWEKASVQEM  
*B. pendula* LASAIRKCGGNEEKGSLLYTAYGSSGQWALFDKQFGRADTQEPDPEGRVPLWENANVKEM  
*O. rehderiana* LASAIRKCGGNEEKGNLTYTAYGSSGQWALFDKQLGRADTQEPDPEGRVPLWENANVKEM  
*Q. robur* LASAIRKCGGNEEKGRLLYTAYGSSGQWGLFDKQFGRSDTQEPDPEGRVPLWENANVKEM  
*F. sylvatica* LAASIRKCGGNEEKGRLLYTAFGSAGQWGLFDREFGRADTQEPDPEGRVPLWENANVKEM  
*F. excelsior* LASAIRKCGGNEEKGALLYTAYGSSGQWALFDKQFGRSDAQEPDPEGRVPLWENANVKEM

*S. robusta* KDKFKAIGLGPRLAVMSAFLGPDQNAATEALLATDPDVSPWVKYORSRETVSOTDYEVD  
*P. chinensis* KDKFKAIGLGPRLAVMSAFLGPDQNAATEALLATDPDVSPWVKYORSRETVSOTDYEVD  
*H. chinensis* KDKFKAIGLGPRLAVMSAFLGPDQNAATEALLATDPDVSPWVKYORSRETVSOTDYEVD  
*D. turbinatus* KDKFKAIGLGPRLAVMSAFLGPDQNAATEALLATDPDVSPWVKYORSRETVSOTDYEVD  
*V. mangachapoi* KDKFKAIGLGPRLAVMSAFLGPDQNAATEALLATDPDVSPWVKYORSRETVSOTDYEVD  
*B. pendula* KDKFSAIGFGPRLAVMSAFLGPDQAATEAFLAADPDVSPWVKYORSRETVSOTDYEVD  
*O. rehderiana* KDKFSAIGFGPRLAVMSAFLGPDQAATEAFLAADPDVSPWVKYORSRETVSOTDYEVD  
*Q. robur* KDKFVAIGFGPRLAVMSAFLGPDQAATEALLATDPDVSPWVKYORSRETVSOTDYEVD  
*F. sylvatica* KDKFSAIGFGPRLAVMSAFLGPDQAATEALLATDPDVSKWVKYORSRETVSETDYEVD  
*F. excelsior* KDKFSAIGFGPRLAVMSAFLGPDQAATEALLASDPEVAKWVVKYORSRETVSOTDYEVD

*S. robusta* LITTLTKLSSLGQOINYEAYTYPVKVDLSKLKL  
*P. chinensis* LITTLTKLSSLGQOINYEAYTYPVKVDFSKLKL  
*H. chinensis* LITTLTKLSSLGQOINYEAYTYPVKVDFSKLKL  
*D. turbinatus* LITTLTKLSSLGQOINYEAYTYPVKVDLGLKLKL  
*V. mangachapoi* LITTLTKLSSLGQOINYEAYTYPVPRVDDL SKLKL  
*B. pendula* LITTLTKLSSLGQOINYEAYSYPKVKVDLSKLKL  
*O. rehderiana* LITTLTKLSSLGQKINYEAYSYPKVKVDLSKLKL  
*Q. robur* LITTLTKLSSLGQOINYEAYTYPVQRVDDL SKLKL  
*F. sylvatica* LITTLTKLSSRLGQOINYEAYTYPVQRVDDL SKLKL  
*F. excelsior* LITTLTKLSSLGQOINYEAYTYPVKVDLSKLKL

n XDH

*S. robusta* YTI**ELLEIVADQPS**MHVLFIPGNP.....GV  
*P. chinensis* YTI**ELLEILADQPS**MHVLFIPGNP.....GV  
*H. chinensis* YTI**ELLEIVADQPS**MHVLFIPGNP.....VL  
*D. turbinatus* YTI**ELLEIIADQPS**MHVLFIPGNP.....GV  
*V. mangachapoi* YTI**ELLEIPAEQPS**MHVLFIPGNP.....GV  
*B. pendula* YTI**ELLEIRADDFK**FHVLFIPGNP.....GV  
*O. reherdiana* YTI**ELLEIRAGDFK**MHVLFIPGNPGEF.....GV  
*Q. robur* YTI**ELLEIHADDFK**MHVLFIPGNPGKFGFVLLCLHVHVCFVDLVLRTIRIRGCLLIVTVGV  
*F. sylvatica* VQTNPIPKLKDPLIFDCATCP.....GV  
*F. excelsior* YKT**DLEIIRADDFK**LHVVFIPGNP.....GV

*S. robusta* VTFYTD**DFVESLFEL**GGTASITA....IGHIQ**T**KK**NW**ER**GR**LF**SL**Q**EQ**ID**HK**MD**FI**KQ  
*P. chinensis* VTFYTD**DFVESLFEL**GGTASITA....IGHIGH**T**KK**NW**ER**GR**LF**SL**Q**EQ**ID**HK**MD**FI**KQ  
*H. chinensis* NPSF.....MMG.....ISILEK**L**P**NN**W**ER**GR**LF**SL**Q**EQID**HK**MD**FI**KQ  
*D. turbinatus* VTFYTD**DFVKS**LFELGGTASITA....IGHIA**Q**T**KK**N**W**ER**GR**LF**SL**Q**EQ**ID**HK**MD**FI**KQ  
*V. mangachapoi* VTFYTD**DFVESLFEL**GGTASITA....IGHIG**Q**T**KK**N**W**ER**GR**LF**SL**Q**EQ**ID**HK**MD**FI**KQ  
*B. pendula* VTFYK**EF**VESLYEVLGGH**AS**VTA....IGHIS**H**T**KK**N**W**ER**GR**LF**SL**Q**EQ**ID**HK**MD**FI**KQ  
*O. reherdiana* VAFYK**DF**VESLYEVLGGH**AS**VTK**T**W**LL**L**V**H**V**N**F**L**P**L**S**W...L**F**SL**Q**EQID**HK**MD**FI**KQ  
*Q. robur* VSFYK**DF**VESLYEVLGGH**VS**.....N**W**D**H**GR**LF**SL**Q**EQID**HK**MD**FI**KQ  
*F. sylvatica* VAFYK**DF**V**EL**LYEFL**EA**.....I**GH**T**S**H**T**KK**NW**DR**GR**LF**SL**Q**EQ**ID**HK**MD**FI**KQ  
*F. excelsior* ISFYTD**DFLES**LFELGGTASVTA....I**GH**IS**H**SE**KD**W**EN**GR**LF**SL**Q**EQID**HK**TS**F**IE**H**

*S. robusta* ELQ**NT**E**I**PL**IL**V**G**HS**IG**SY**IS**L**Q**ML**RR**SP**E**K**V**I.....YY**I**GL**Y**.P**FL**AL**N**L**Q**SK**K**Q  
*P. chinensis* ELQ**NT**E**I**PL**IL**V**G**HS**IG**SY**IS**L**Q**ML**RR**SP**E**K**V**I.....CY**I**GL**Y**.P**FL**AL**N**L**Q**SK**K**Q  
*H. chinensis* ELQ**NT**E**I**PL**IL**V**G**HS**IG**SY**IS**L**Q**ML**RR**SP**G**K**V**I.....YY**I**GL**Y**.P**FL**AL**N**L**Q**SK**K**Q  
*D. turbinatus* ELQ**NT**E**I**PL**IL**V**G**HS**IG**SY**IS**L**Q**ML**RR**SP**E**K**V**V.....YY**I**GL**Y**.P**FL**AL**N**L**Q**SK**K**Q  
*V. mangachapoi* ELQ**NT**E**I**PL**IL**V**G**HS**IG**SY**IS**L**Q**ML**RR**SP**E**K**V**L.....YY**I**GL**Y**.P**FL**AL**N**L**Q**SK**K**Q  
*B. pendula* E**L**EN**T**E**V**PI**L**V**G**HS**IG**SY**IA**ID**M**FR**RS**SE**K**VA.....CC**I**GL**Y**.P**FL**AL**N**L**Q**SK**K**Q  
*O. reherdiana* E**L**EN**T**E**V**PI**L**V**G**HS**IG**SY**IA**L**D**M**F**RR**S**SE**K**VA.....Y**C**I**G**L**Y**.P**FL**AL**N**L**Q**SK**K**Q  
*Q. robur* E**L**EN**T**E**V**PI**L**V**G**HS**IG**SY**MA**ID**I**FR**RS**LE**K**GL.....M**V**L**V**F**E**F.....  
*F. sylvatica* E**L**EN**T**E**V**PI**L**V**G**HS**IG**SY**IS**ID**M**FR**RS**LE**K**MLGV**S**M**D**W**V**Y**C**C**A**N**P**V**L**P**K**S**N**W**T**R**P**K**G**G**P**  
*F. excelsior* E**F**Q**D**V**E**V**P**I**L**V**G**HS**IG**A**W**IS**L**E**I**F**R**RS**Q**E**K**V**I**.....YY**I**GL**Y**.P**FL**AV**N**T**V**SS**A**Q

*S. robusta* I**I**IG**K**I**A**M**S**K**V**L**S**T**S**A**S**F**L**V**A**S**L**G**L**L**P**R**W**T**L**R**L**I**V**K**N**F**L**G**K**S**W**S**N**A**A**V**E**A**A**C**S**H**L**P**Q**Y**H**V  
*P. chinensis* I**I**IG**K**I**A**M**S**K**V**L**S**T**S**A**S**F**L**V**A**S**L**G**L**L**P**R**W**T**L**R**L**I**V**K**N**F**L**G**K**S**W**S**N**A**A**V**E**A**A**C**S**H**L**P**Q**Y**H**V  
*H. chinensis* I**I**IG**K**I**A**M**S**K**V**L**S**T**S**A**S**F**L**V**A**S**L**G**L**L**P**R**W**T**L**R**L**I**V**K**N**F**L**G**K**S**W**S**N**A**A**V**E**A**A**C**S**H**L**P**Q**Y**H**V  
*D. turbinatus* I**I**IG**K**I**A**M**S**K**V**L**S**T**S**A**S**F**L**V**A**S**L**G**L**L**P**R**W**T**L**R**L**I**V**K**N**F**L**G**K**S**W**S**N**A**A**V**D**A**A**C**S**H**L**P**Q**Y**H**V  
*V. mangachapoi* I**I**IG**K**I**A**M**S**K**L**L**S**T**S**A**S**F**L**V**A**S**L**G**L**L**P**R**W**T**L**R**L**I**A**K**S**F**L**G**K**S**W**S**N**A**A**V**E**A**A**C**S**H**L**P**Q**Y**H**V  
*B. pendula* S**I**IG**K**I**A**A**S**R**V**L**S**V**A**L**S**L**I**V**A**S**L**R**F**L**P**I**R**A**L**R**L**I**L**T**N**S**L**G**K**S**W**S**P**A**A**V**E**A**A**C**S**H**L**V**Q**Y**H**T  
*O. reherdiana* S**I**IG**K**I**A**A**S**Q**L**L**S**A**A**I**S**L**I**V**A**S**L**G**L**F**L**P**I**R**A**L**R**L**I**I**T**N**S**L**G**K**S**W**S**V**A**V**N**A**A**C**S**H**L**V**Q**Y**H**T  
*Q. robur* .....R**S**Q**V**L**S**V**A**I**S**L**I**A**S**L**K**F**L**P**S**W**A**L**R**L**I**V**T**N**S**L**G**K**S**W**S**A**A**L**E**A**T**C**S**H**L**V**Q**Y**H**T  
*F. sylvatica* M**L**L**V**F**E**F**R**S**R**V**L**S**V**A**L**S**L**V**A**S**L**G**F**L**P**S**W**T**L**R**L**I**V**K**N**S**V**G**K**S**W**S**A**T**A**V**E**A**T**C**S**H**L**V**Q**...  
*F. excelsior* S**F**I**R**R**L**A**G**S**Q**F**L**C**A**A.....L**G**K**S**W**S**S**P**A**V**V**S**F**C**T**S**V**L**V**Q**Y**H**T

*S. robusta* M**R**N**V**L**F**M**A**M**T**E**F**Q**K**L**A**E**T**P**D**W**A**F**M**R**E**N**Q**D**K**I**A**F**L**F**S**T**D**D**H**W**G**P**L**Q**M**L**D**E**I**A**K**Q**V**P**G**A**S**L**S**  
*P. chinensis* M**R**N**V**L**F**M**A**M**T**E**F**Q**K**L**A**E**T**P**D**W**A**F**M**R**E**N**Q**D**K**I**A**F**L**F**S**T**D**D**H**W**G**P**L**Q**M**L**D**E**I**A**K**Q**V**P**G**A**S**L**S**  
*H. chinensis* M**Q**N**V**L**F**M**A**M**T**E**F**Q**K**L**A**E**T**P**D**W**A**F**M**R**E**N**Q**D**K**I**A**F**L**F**S**T**D**D**H**W**G**P**L**Q**M**L**D**E**I**A**K**Q**V**P**G**A**S**L**S**  
*D. turbinatus* M**Q**N**V**L**F**M**A**M**T**E**F**R**E**L**A**E**T**P**D**W**A**F**M**R**E**N**Q**D**K**I**A**F**L**F**S**T**D**D**H**W**G**P**L**Q**M**L**E**E**I**A**K**Q**A**P**G**A**A**L**A**  
*V. mangachapoi* M**R**N**V**L**F**M**A**M**T**E**F**R**K**L**A**E**T**P**D**W**E**F**M**R**E**N**Q**D**K**I**A**F**L**F**S**T**D**D**H**W**G**P**L**Q**I**L**E**E**I**A**E**Q**V**P**G**A**S**L**S**  
*B. pendula* M**R**N**V**L**F**M**A**M**T**E**F**R**K**L**T**E**T**P**D**W**A**F**V**R**E**K**Q**E**K**L**A**F**L**F**G**V**D**D**H**W**G**P**L**Q**M**F**E**E**I**S**K**H**V**P**G**I**A**L**S**  
*O. reherdiana* M**R**N**I**L**F**M**A**M**T**E**F**R**K**L**T**E**T**P**D**W**A**F**V**R**E**K**Q**E**K**L**A**F**L**F**G**V**D**D**H**W**G**P**L**Q**M**F**E**E**I**S**K**H**V**P**G**I**A**L**S**  
*Q. robur* I**R**N**S**L**F**M**T**M**I**E**F**Q**K**L**T**E**T**P**D**W**A**F**M**R**E**N**R**E**K**L**A**F**L**F**G**V**D**D**H**W**A**P**L**Q**M**F**E**E**I**S**N**Q**V**P**G**I**A**L**S**  
*F. sylvatica* .....V**K**F**Y**.....P.....  
*F. excelsior* I**R**N**M**L**F**M**A**M**T**E**F**E**K**L**S**E**K**P**D**L**A**F**M**R**E**K**K**S**Q**I**A**F**L**F**G**D**D**H**W**G**P**L**H**L**Y**E**E**I**R**K**Q**I**P**D**A**R**V**A



O GPS

*S. robusta* FFKVGVGKRRFRPTVLLLMATALNVRIPVSRVGDTVATDLRTRQOCIAEITSEMIHVA  
*P. chinensis* FFKVGVGKRRFRPTVLLLMATALNVRIPVSRVGDTVATDLRTRQOCIAEITSEMIHVA  
*H. chinensis* FFKVGVGKRRFRPTVLLLMATALNVRIPVSRVGDTVATDLRTRQOCIAEITSEMIHVA  
*D. turbinatus* FFKVGVGKRRFRPTVLLLMATALNVRIPVSRVGDTVATDLRTRQOCIAEITSEMIHVA  
*V. mangachapoi* FFKVGVGKRRFRPTVLLLMATALNVRIPVSRVGDTVATDLRTRQOCIAEITSEMIHVA  
*B. pendula* FFKMVGEGKRRFRPTVLLLMATALNVSIPQPFSEPVVLTKELRARQOCIAEITSEMIHVA  
*O. rehderiana* FFKMVGEGKRRFRPTVLLLMATALNVSIPQPFSEPVVLTKELRARQOCIAEITSEMIHVA  
*Q. robur* WVKVGF...YLESVLLLMATAMNVSILEPSLRGPGDALTELRARQOCIAEITSEMIHVA  
*F. sylvatica* FFKLGVGKRRFRPTVLLLMATAMDVSIPEPPSGPDALTELRARQOCIAEITSEMIHVA  
*F. excelsior* FFKLGVGKRRFRPTVLLLMATAMNLPMSGLPPDATHVTSVSELRTRQOCIAEITSEMIHVA

*S. robusta* SLLHDDVLDLDDAKRRGIGSLNAVVMGNK.LAVLAGDFLLSRACVALASLKN.....  
*P. chinensis* SLLHDDVLDLDDAKRRGIGSLNAVVMGNK.LAVLAGDFLLSRACVALASLKN.....  
*H. chinensis* SLLHDDVLDLDDAKRRGIGSLNAVVMGNK.LAVLAGDFLLSRACVALASLKN.....  
*D. turbinatus* SLLHDDVLDLDDAKRRGIGSLNAVVMGNK.LAVLAGDFLLSRACVALASLKN.....  
*V. mangachapoi* SLLHDDVLDLDDAKRRGIGSLNAVVMGNK.LAVLAGDFLLSRACVALASLKN.....  
*B. pendula* SLLHDDVLDLDDAKRRGIGSLNAVVMGNK.LAVLAGDFLLSRACVALASLKN.....  
*O. rehderiana* SLLHDDVLDLDDAKRRGIGSLNAVVMGNK.LAVLAGDFLLSRACVALASLKN.....  
*Q. robur* SLLHDDVLDLDDAKRRGIGSLNAVVMGNK.LAVLAGDFLLSRACVALASLKN.....  
*F. sylvatica* SLLHDDVLDLDDAKRRGIGSLNAVVMGNK.LAVLAGDFLLSRACVALASLKN.....  
*F. excelsior* SLLHDDVLDLDDAKRRGMRSLNFAMGNK.LAVLAGDFLLSRACVALASLKN.....PRIMLEYPSI

*S. robusta* .....TEVVSLLATVVEHLVTGETMQMTTSEQRSS.....  
*P. chinensis* .....TEVVSLLATVVEHLVTGETMQMTTSEQRSS.....  
*H. chinensis* .....TEVVSLLATVVEHLVTGETMQMTTSEQRSS.....  
*D. turbinatus* .....TEVVSLLATVVEHLVTGETMQMTTSEQRSS.....  
*V. mangachapoi* .....TEVVSLLATVVEHLVTGETMQMTTSEQRSS.....  
*B. pendula* .....TEVVSLLAKVVEHLVTGETMQMTTSEQRSS.....  
*O. rehderiana* .....TEVVSLLAKVVEHLVTGETMQMTTSEQRCCQFTLIQLVVAYVANVLLCTFFS  
*Q. robur* .....TEVVSLLAKVVEHLVTGETMQMTTCEQRCS.....  
*F. sylvatica* .....TEVVSLLAKVVEHLVTGETMQMTTSEQRCS.....  
*F. excelsior* SSDQLLAISSVVSLLATVVEHLVTGETMQMTTSDQRCS.....

*S. robusta* .....LEYIMOKTYKKTASLISNSCKAIALLAGOTTEVAVLAFEYGNLGLAFQ  
*P. chinensis* .....LEHYIMOKTYKKTASLISNSCKAIALLAGOTTEVAVLAFEYGNLGLAFQ  
*H. chinensis* .....LEYIMOKTYKKTASLISNSCKAIALLAGOTTEVAVLAFEYGNLGLAFQ  
*D. turbinatus* .....LEYIMOKTYKKTASLISNSCKAIALLAGOTTEVAVLAFEYGNLGLAFQ  
*V. mangachapoi* .....IDYIMOKTYKKTASLISNSCKAIALLAGOTTEVAVLAFEYGNLGLAFQ  
*B. pendula* .....MEYIMOKTYKKTASLISNSCKAIALLAGOTAEVAMLAYEYGNLGLAYQ  
*O. rehderiana* LLTKLTFRNTIMEYIMOKTYKKTASLISNSCKAIALLAGOTAGVAMLAYEYGNLGLAYQ  
*Q. robur* .....MEYIMOKTYKKTASLISNSCKAIALLAGOTSEVAMLAYEYGNLGLAYQ  
*F. sylvatica* .....MEYIMOKTYKKTASLISNSCKAIALLAGOTAEVSMLAYEYGNLGLAYQ  
*F. excelsior* .....MEYIMOKTYKKTASLISNSCKAIALLAGOTTEVSMLAYEYGNLGLAYQ

*S. robusta* LIDDVLDFTGTSASLGKGSLSDIRHGIITAPILFAMEEFPQLRAVVDQG...FDNPNANIDI  
*P. chinensis* LIDDVLDFTGTSASLGKGSLSDIRHGIITAPILFAMEEFPQLRAVVDQG...FDNPNANIDI  
*H. chinensis* .....VCKVFNVFNALIFSMNMISSGSI...FDNPNANIDI  
*D. turbinatus* LIDDVLDFTGTSASLGKGSLSDIRHGIITAPILFAMEEFPQLRAVVDQG...FDNPNANIDI  
*V. mangachapoi* LIDDVLDFTGTSASLGKGSLSDIRHGIITAPILFAMEEFPQLRAVVDQG...FDNPNANIDI  
*B. pendula* LIDDVLDFTGTSASLGKGSLSDIRHGIITAPILFAMEEFPQLRAVVDQG...FDNPNANIDI  
*O. rehderiana* LIDDVLDFTGTSASLGKGSLSDIRHGIITAPILFAMEEFPQLRAVVDQG...FDNPNANIDI  
*Q. robur* LIDDVLDFTGTSASLGKGSLSDIRHGIITAPILFAMEEFPQLRAVVDQG...FDNPNANIDI  
*F. sylvatica* LIDDVLDFTGTSASLGKGSLSDIRHGIITAPILFAMEEFPQLRAVVDQG...FDNPNANIDI  
*F. excelsior* LIDDVLDFTGTSASLGKGSLSDIRHGIITAPILFAMEEFPQLRAVVDQG...FDNPNANIDI

*S. robusta* ALEYLGKSHGRTQRTRELAKKHANLAA...AIDSLPESNDEDVRRSRALIDLTOIVITRNK.  
*P. chinensis* ALEYLGKSHGRTQRTRELAKKHANLAA...AIDSLPESNDEDVRRSRALIDLTOIVITRNK.  
*H. chinensis* .....GGACNINTHRDL...AIDSLPESNDEDVRRSRALIDLTOIVITRNK.  
*D. turbinatus* ALEYLGKSHGRTQRTRELAKKHANLAA...AIDSLPESNDEDVRRSRALIDLTOIVITRNK.  
*V. mangachapoi* ALEYLGKSHGRTQRTRELAKKHANLAA...AIDSLPESNDEDVRRSRALIDLTOIVITRNK.  
*B. pendula* ALEYLGKSRGRTQRTRELAKKHANLAA...AIDSLPESNDEDVRRSRALIDLTOIVITRNG  
*O. rehderiana* ALEYLGKSRGRTQRTRELAKKHANLAA...AIDSLPESNDEDVRRSRALIDLTOIVITRNG  
*Q. robur* ALDYLGKSRGRTQRTRELAKKHANLAA...AIDSLPESNDEDVRRSRALIDLTOIVITRNG  
*F. sylvatica* ALDYLGKSRGRTQRTRELAKKHANLAA...AIDSLPESNDEDVRRSRALIDLTOIVITRNG  
*F. excelsior* ALEYLGKSCGRTQRTRELAKKHANLAA...AIDSLPESNDEDVRRSRALIDLTOIVITRNG

p ADH

|                       |            |             |         |               |             |         |       |
|-----------------------|------------|-------------|---------|---------------|-------------|---------|-------|
| <i>S. robusta</i>     | PVYHYCAVSS | SFSEYTVVHSG | CAVKVSS | FVPLDKICLLSCG | VAAAGLGAAWN | VADISPG | GSTV  |
| <i>P. chinensis</i>   | PVYHYCAVSS | SFSEYIVVHSG | CAVKVGS | LAPLDKICLLSCG | VAAAGLGAAWN | VADISPG | GSTV  |
| <i>H. chinensis</i>   | PVYHYCAVSS | SFSEYTVVHSG | CAVKVGS | YAPLDKICLLSCG | VAAAGLGAAWN | VADISPG | GSTV  |
| <i>D. turbinatus</i>  | PVYHYCAVSS | SFSEYTVVHSG | CAVKVSS | FAPLDKICLLSCG | VAAAGLGAAWN | VADISPG | GSTV  |
| <i>V. mangachapoi</i> | PVYHYCAVSS | SFSEYTVVHSG | CAVKVSS | FAPLDKICLLSCG | VAAAGLGAAWN | VADISPG | GSTV  |
| <i>B. pendula</i>     | PVYHYCAVSS | SFSEYTVVHSG | CAVKVSS | LAPLEKICLLSCG | VAAAGLGAAWN | VADISK  | GSSV  |
| <i>O. rehderiana</i>  | .....SF    | QLSVLNN     | GV..... | .....         | VLLGLGAAWN  | VADISE  | SGSTV |
| <i>Q. robur</i>       | PIYHYCAVSS | SFSEYTVVHSG | CAVKVSP | LAPLEKICLLSCG | VAAAGLGAAWN | VADICK  | KGSTV |
| <i>F. sylvatica</i>   | PIYHYCAVSS | SFSEYTVVHSG | CAVKVSP | LAPLEKICLLSCG | VAAAGLGAAWN | VADISK  | KGSTV |
| <i>F. excelsior</i>   | SVYHYCAVSS | SFSEYTVVHSG | CAVKISS | SAPLEKICLLSCG | VAAAGLGAAWN | VANVSE  | KGSTV |

|                       |        |         |              |           |                   |           |    |
|-----------------------|--------|---------|--------------|-----------|-------------------|-----------|----|
| <i>S. robusta</i>     | VIFGLG | TVGLSVA | QGARLRGASRI  | IGVDTNPEK | CEKAKAFGVTEFLNPND | CNEPIQOV  | IK |
| <i>P. chinensis</i>   | AIFGLG | TVGLSVA | QGAALRGASRI  | IGVDTNPEK | CEKAKDFGVTEFLNPND | CNEPIQOV  | IK |
| <i>H. chinensis</i>   | VIFGLG | TVGLSVA | QGAALRGASRI  | IGIDTNHEK | CEKAKAFGVTEFLNPND | CNEPIQOV  | IK |
| <i>D. turbinatus</i>  | VIFGLG | TVGLSVA | QGAALRGAARI  | IGIDTNPEK | CEKAKAFGVTEFLNPNE | CNEPIQOV  | IK |
| <i>V. mangachapoi</i> | VIFGLG | TVGLSVA | QGAALRGASRI  | IGIDTNPEK | CEKAKVFGVTEFLNPNE | CNEPIQOV  | IK |
| <i>B. pendula</i>     | VIFGLG | TVGLSVA | QGAALRGASQI  | IGVDTNPEK | AEKAKAFGVTEFLNPND | SNEPMQOV  | IK |
| <i>O. rehderiana</i>  | AIFGLR | TVGLSVA | QGAALRGASQI  | IGVDTNPEK | GEKAKAFGVTEFLNPND | SDEPLQVI  | IK |
| <i>Q. robur</i>       | VIFGLG | TVGLSVA | QGAALRGASRI  | IGVDTNPEK | GEIAKAFGITEFLDPND | SNEPIQOV  | IK |
| <i>F. sylvatica</i>   | VIFGLG | TVGLSV  | .....        | .....     | .....             | .....     | IK |
| <i>F. excelsior</i>   | VIFGLG | TVGLSV  | VQGAALRGASRI | IGVDTNPEK | NEKAKAFGVTDLLNPND | YNEPIAQVI | IK |

|                       |    |         |            |            |          |               |               |          |         |   |
|-----------------------|----|---------|------------|------------|----------|---------------|---------------|----------|---------|---|
| <i>S. robusta</i>     | RI | DGGT    | DYS        | FECIGDTGMI | TTALQSCD | DGWGLT        | ITLGVPKVKPEVA | AHYGL    | FLTGRTL | R |
| <i>P. chinensis</i>   | HL | DGGT    | DYS        | FECIGDTGMI | TTALQSCD | DGWGLT        | ITLGVPKVKPEVA | AHYGL    | FLTGRTL | R |
| <i>H. chinensis</i>   | RI | DGGT    | DYS        | FECIGDTGMI | TTALQSCD | DGWGLT        | ITLGVPKVRPEVA | AHYGL    | FLTGRTL | R |
| <i>D. turbinatus</i>  | RI | DGGT    | DYS        | FECIGDTGMI | TTALQSCD | DGWGLT        | ITLGVPKVKPEVA | AHYGL    | FLTGRTL | R |
| <i>V. mangachapoi</i> | RI | DGGT    | DYS        | FECIGDTGMI | TTALQSCD | DGWGLT        | ITLGVPKVKPEVA | AHYGL    | FLTGRTL | R |
| <i>B. pendula</i>     | RI | TGGADYS | FECIGDTGMV | TTALQSCD   | DGWGLT   | VTLGVPKKPEVA  | MAHYGL        | FLITGRTL | K       |   |
| <i>O. rehderiana</i>  | RI | TGGADYS | FECIGDTGMV | TTALQSCD   | DGWGLT   | VTLGVPKKPEVA  | MAHYGL        | FLITGRTL | K       |   |
| <i>Q. robur</i>       | RI | TGGADYS | FECIGDTGMV | TTALQSCD   | DGWGLT   | VTLGVPKKPEVA  | MAHYGL        | FLITGRTL | K       |   |
| <i>F. sylvatica</i>   | RI | TGGADYS | FECIGDTGMV | TTALQSCD   | DGWGLT   | VTLGVPKKPEVA  | MAHYGL        | FLITGRTL | K       |   |
| <i>F. excelsior</i>   | RM | TGGADFA | FECIGDTGMI | TTALQSCD   | DGWGLT   | VTLGVPKVKPEVA | MAHYGL        | LLTGRTL  | T       |   |

|                       |      |        |     |        |         |         |                      |       |   |     |
|-----------------------|------|--------|-----|--------|---------|---------|----------------------|-------|---|-----|
| <i>S. robusta</i>     | GSLF | GGWPKK | TDI | PSLVDK | YINKEIQ | IDDFI   | THNLPFEDINKAFSLMREGK | CLRCV | I | HMP |
| <i>P. chinensis</i>   | GSLF | GGWPKK | TDI | PSLVDK | YINKEIQ | IDDFI   | THNLPFEDINKAFSLMREGK | CLRCV | V | HMP |
| <i>H. chinensis</i>   | GSLF | GGWPKK | TDI | PSLVDK | YINKEIQ | IDDFI   | THNLPFEDINKAFSLMREGK | CLRCV | V | HMP |
| <i>D. turbinatus</i>  | GSLF | GGWPKK | TDI | PSLVEK | YINKEIQ | IDDFI   | THNLPFEDINKAFSLMREGK | CLRCV | I | HMP |
| <i>V. mangachapoi</i> | GSLF | GGWPKK | TDI | PSLVDK | YINKEIQ | IDDFI   | THNLPFEDINKAFSLMREGK | CLRCV | I | HMP |
| <i>B. pendula</i>     | GSLF | GGWPKK | TDI | PSLVDK | YINKEIQ | IDDFI   | THNLPFEDINKAFSLMREGK | CLRCV | I | HMP |
| <i>O. rehderiana</i>  | GSLF | GGWPKK | TDI | PSLVDK | YINKEIQ | IDDFI   | THNLPFEDINKAFSLMREGK | CLRCV | I | HMP |
| <i>Q. robur</i>       | GSLF | GGWPKK | TDI | PSLVDK | YINKEIQ | IDDFI   | THNLPFEDINKAFSLMREGK | CLRCV | I | HMP |
| <i>F. sylvatica</i>   | GSLF | GGWPKK | TDI | PSLVDK | YINKEIQ | IDDFI   | THNLPFEDINKAFSLMREGK | CLRCV | I | HMP |
| <i>F. excelsior</i>   | GSLF | GGWPKK | TDI | PSLVNM | YLNKQEI | KIDEIFI | THNLPFEDINEAFSLMREGK | CLRCV | I | HMP |



q NGLY1

*S. robusta* MVARKFLVRHDDSDFDVDYNTDNGFEVFKFQFLSLTSLIPDEQKILG.EDGD RVVSSDSD  
*P. chinensis* .....  
*H. chinensis* MVARKFLVRHDDAAFDVDYD TDDGFVFKFQFLSLTSLIPDEQKVA TCLSSGKMVIALCL  
*D. turbinatus* MVARKFLVRHDDSAFDVDYD TDDGFVFKFQFLSLTSLIPDEQKILG.EDDD RVVSSDSD  
*V. mangachapoi* MVARKFLVRRNGAAFDVDYD TDDGFVFKFQFLSLTSLIPDDQKILG.EDDD RVVSSDSD  
*B. pendula* MVARKFLVLRHNDSDFFVDYD TDDGFVFKFQFLSLTSLIPDEQKIVS.VDDDRVLSDES  
*O. rehderiana* MVARKFLVRHSDHEFDVDYD TDDGFVFKFQIFSLTSLIPPEEQKIVS.VDGNRVLSDDSD  
*Q. robur* MVARKFLVRRHNDADFVVDYD TDDGFELKFKQFLSLTSLVVPDDQKI I A.VDENRVLSDDSD  
*F. sylvatica* MVARKFLVRRHNDADFVVDYD TDDGFELFKYQFLSLTSLVLPDEQKIVG.VDENRVVYDDSD  
*F. excelsior* MVARKFLVQHNGSTFDLDYD TDDGFVFLKFQFLSLTSLIPDEQKIFG.GDDE RTVSDSD

*S. robusta* LVTISEKLRRLVS...ISEEDKEKQEEETAESSQKS DSEFLK SDEELARILQAEFEALLHQ  
*P. chinensis* .....  
*H. chinensis* ATLLISSPFRSSGWYRSLKTDKEKQEEETAENSQK DSDFLK SDEELARKLQAEFEALLLQ  
*D. turbinatus* LLAIISDKLRRLVS...ISEENKEKQEEETESSQ. DAELK SDEEFARMLQAEFEALLRQ  
*V. mangachapoi* LVTISEKLRRLVS...ISEEDKEKQEEETESREKFDTEILISDEELARILQAEFEALLLQ  
*B. pendula* LISISEKLRRLVS...INDEVQEQRTSSTNSVRNDSQSLMSDEELARMLQAEFEALLLQ  
*O. rehderiana* LISISEKLRRLVS...INDEVQEHQGTSTNSVRNDFQSLISDEELARMLQAEFEALLLQ  
*Q. robur* LISVAERLRLVS...VNDEVNEQPQSSSHIAGNAALMSDEQLARILQAEFEALMLQ  
*F. sylvatica* LVSISERLRLVS...VNDEV.KQPQES...AGNDAALGMSDEELARMLQAEFEALMLQ  
*F. excelsior* LEMISHKLRLLS...IDEVEKEKT...EPDFAKSDEEFARLLQAEFEALMMQ

*S. robusta* QYAVVE...NSSQFERQVRPYISRVLMYEDPVRQEAARKSVVPDKLEEKSLVSLAR..EG  
*P. chinensis* .....  
*H. chinensis* QYAVGE...DSGQFGROIRPYISQVLMYEPPVRQEAARKTVPVDKLEEKALVSLAR..EG  
*D. turbinatus* QYAVGE...HSQFEQQRIRPYISKVLMYEDPVRQEAARKTVPVDKLEEKALVSLAR..EG  
*V. mangachapoi* QYAVGQDSKSSQFEQIRPYISQVLMYEDSDRQEAARKTVPVDKLEEKALVSLAR..EG  
*B. pendula* QYVAAD...DNGEFERRIRPYVDQVRMYEDPVRQEAARKTVPVIELEEKALVSLAK..EG  
*O. rehderiana* QFVAAB...DNGEFESKIRPYVDQVRMYEDPVRQEAARN TVPVELEEKALVSLAK..EG  
*Q. robur* PHIAAG...STEDFEKQIRPYVDKVRMYEDPVYQEAARKTAPVDELEEKALVALAR..EG  
*F. sylvatica* QYVAPE...NTGDFERQIRPYVDKVLGYEDSVRQEAARKTVPVELEEKALISLAKVWG  
*F. excelsior* QFVA SE...NKEQVEQRIRPYVGQVLMYEDPHRQEAARKTVPVDKLEEKALIALAR..EG

*S. robusta* NFKPSKS EQDHAFLLQLLFWFKQSF SWNAPPCD G.....CGKETSNQ  
*P. chinensis* .....  
*H. chinensis* NLKPSKS EQDHAFLLQLLFWFKQSF SWNAPPCD G.....CGNETKNQ  
*D. turbinatus* NLKPSKS EQDHAFLLQLLFWFKQSF SWNAPPCD G.....CGNETSSQ  
*V. mangachapoi* NLEPSKS EQDHAFLLQLLFWFKQSF SWNEPPCD G.....CGNETRSQ  
*B. pendula* NFKPSKIEQDDAFLLQLLFWFKQSF RWNAPPCD G.....CGKTI SH  
*O. rehderiana* NFNPSKIEQDHAFLLQLLFWFKK SFRWVDVPPCD G.....CGSKTVRQ  
*Q. robur* NFEPSKV EQDHAFLLQLLFW.....WVNVP CDV.....CGSETINQ  
*F. sylvatica* GVEIN.....LKKLL.....WESGVGIALQALKTL LKDFFSVNFTS CGSETISQ  
*F. excelsior* NFNPTKN EKDHAFLLQLLFWFKQSF RWNAPPCDS.....CNETTVSQ

*S. robusta* GMGAALPTELSYGATRVELYRCNFCSRITRFPYNDPLKLVETRKGRGGEWANCFTLYCR  
*P. chinensis* .MGMALPTELSYGATQVELYWCNFCSRITRFPYNDPLKLVETRKGRGGEWANCFTLYCR  
*H. chinensis* GMGAALPAELSYGATRVELYRCNFCSRITRFPYNDPLKLVETRKGRGGEWANCFTFYCR  
*D. turbinatus* GMGAALPTELSYGANRVELYRCNFCSRITRFPYNDPLKLVETRKGRGGEWANCFTLYCR  
*V. mangachapoi* GMGAALPTELSYGATRVELYRCHFCSRITRFPYNDPLKLVETRKGRGGEWANCFTLYCR  
*B. pendula* GMGSLPSEIOYGASRVELYICSFCSRITRFPYNDPLKLVETRRGRGGEWANCFTLYCR  
*O. rehderiana* GMGSLSEIOYGASQVELYLC SFCSRITRFPYNDV LKLETRGRGGEWANCFTLYCR  
*Q. robur* GMGSPDSESIOYGASRVELYR.....FWKQEEGVAGSGPIALRFIVE  
*F. sylvatica* GMGSLSEIOYGASRVELYR.....LWKQEGGVAGSGPIALHFIVE  
*F. excelsior* GMGMANSSESLYGASRIELYRCKLCSNVTRFPYNDPMKLETRKGRGGEWANCFTLYCR

*S. robusta* SFGYESR.....LILDFTDHVWTECYSESLGRWMHLDPCDGVYDKP LLYEKGWNKKL  
*P. chinensis* SFGYESR.....LILDFTDHVWTECYSSESLGRWMHLDPCDGVYDKP LLYEKGWNKKL  
*H. chinensis* SFGYESR.....LILDFTDHVWTECYSSESLGRWMHLDPCDGVYDKP LLYEKGWNKKL  
*D. turbinatus* SFGYESR.....LILDFTDHLWTECYSSESLGRWMHLDPCDGVYDRP LLYEKGWNSKKL  
*V. mangachapoi* SFGYESR.....LILDFTDHVWTECYSSESLGRWMHLDPCDGVYDKP LLYEKGWNKKL  
*B. pendula* AFGYESR.....LILDFTDHVWTECF SQVLRWMHLDPCDGVSDR P LLYEKGWSKKL  
*O. rehderiana* AFGYESR.....LILDFTDHVWTECF SQVLRWMHLDPCDGVYDIP LLYEKGWSKKL  
*Q. robur* LLAMNHVW.....LILDFGDHVWTECF SQVLRWMHLDPCDGVYDKP LLYEKGWNKKL  
*F. sylvatica* LLAMNPVCDQIHTTDQVILDFTDHLWTECFSESLGRWMHLDPCDGVYDKP LLYEKGWKKL  
*F. excelsior* AFGYESR.....LILDFTDHVWTECFSSYLGRWMHLDPCDGEI FDN P LLYEKGWNKKL







r NDH

|                       |                                             |       |       |       |        |
|-----------------------|---------------------------------------------|-------|-------|-------|--------|
| <i>S. robusta</i>     | MLAMDGSWVQEFNLLSTRET.....KIIISLSYRVLDEVMI   | MELLS | PKA   | SSVS  | SSPFS  |
| <i>P. chinensis</i>   | .....                                       | MAFR  | LF    | GFFT  | CLYYL  |
| <i>H. chinensis</i>   | ..MVLGESKQNLSTQSTPSFSEAVPSWKIIISLSYRVLDEVMI | MELLS | PKA   | SSVS  | SSPFS  |
| <i>D. turbinatus</i>  | .....                                       | ..... | ..... | ..... | MYL    |
| <i>V. mangachapoi</i> | .....                                       | MT    | MELLS | PKA   | SSVS   |
| <i>B. pendula</i>     | .....                                       | MEVVS | SKDS  | SSV   | ASSPFS |
| <i>O. rehdieriana</i> | .....                                       | MEVVS | SKES  | SSV   | ASSPFS |
| <i>Q. robur</i>       | .....                                       | MEVLS | PKD   | SSV   | ASSPFS |
| <i>F. sylvatica</i>   | .....                                       | MEVLS | PKD   | SSV   | ASSPFS |
| <i>F. excelsior</i>   | .....                                       | ..... | MD    | CSSL  | SSPFS  |

|                       |                                                                 |
|-----------------------|-----------------------------------------------------------------|
| <i>S. robusta</i>     | SPNIGALLRIKIIS..WSOETGLPVSLRVRIRDRIFSLHKKHPMFSKSGYFQKRLTESNEL   |
| <i>P. chinensis</i>   | CNFVIEEVL SFGILDPVRSOETGLPVSLRVRIRDRIFSLHKKHPMFSKSGYFQKRLTESNEL |
| <i>H. chinensis</i>   | SPNIGALLRIKIIS..WSOETGLPVSLRVRIRDRIFSLHKKHPMFSKSGYFQKRLTESNEL   |
| <i>D. turbinatus</i>  | CNSVEQLLSFGILDPVRSOETGLPVSLRVRIRDRIFSLHKKHPMFSKSGYFQKRLTESNEL   |
| <i>V. mangachapoi</i> | SPNIGALLRIKIIS..WSOETGLPVCLRVRLGDRIFSLHKKHPMFSKSGYFQKRLTESNEL   |
| <i>B. pendula</i>     | SPNIGALLRIKIIS..WSOETGLPVSVRVRVGDRIFNHKKHPMFSKSGYFKKRLDSDTDL    |
| <i>O. rehdieriana</i> | SPNIGALLRIKIIS..WSOETGLPVSVRVRVGDRIFNHKKHPMFSKSGYFKKRLDSDTDL    |
| <i>Q. robur</i>       | SPNIGALLRIKIIS..WSOETGLPVSVRVRVGDRIFNHKKHPMFSKSGYFKKRLDSDTDL    |
| <i>F. sylvatica</i>   | SPNIGALLRIKIIS..WSOETGLPVSVRVRVGDRIFNHKKHPMFSKSGYFKKRLDSDTDL    |
| <i>F. excelsior</i>   | SPNVALLRIKIIS..WSOETGLPVSVRVRVADRTFNHKKHPMFSKSGYFKKRLDSDTDL     |

|                       |                                                              |
|-----------------------|--------------------------------------------------------------|
| <i>S. robusta</i>     | ELPQNFPGGPETFEMIVLFIYGSSTLVDPFNVAALRCAAEFLEMTEEYCTGNLCDRFDLY |
| <i>P. chinensis</i>   | ELPQNFPGGPETFEMIVLFIYGSSTLVDPFNVAALRCAAEFLEMTEEYCTGNLCDRFNLY |
| <i>H. chinensis</i>   | ELPRNFPGGPETFEMIVLFIYGSSTLVDPFN.....                         |
| <i>D. turbinatus</i>  | ELPQNFPGGPETFEMIVLFIYGSSTLVDPFNVAALRCAAEFLEMTEEYCTGNLCDRFDLY |
| <i>V. mangachapoi</i> | ELPQNFPGGPETFEMIVLFIYGSSTLVDPFNVAALRCAAEFLEMTEEYCTGNLCDRFDLY |
| <i>B. pendula</i>     | ELPQGFPGGPETFEMIALFIYGSSTFVDPFNVAALRCAAEFLEMTEYCSNLCERFDLY   |
| <i>O. rehdieriana</i> | ELPQGFPGGPETFEMIALFIYGSSTLVDPFNVAALRCAAEFLEMTEYCSNLCERFDLY   |
| <i>Q. robur</i>       | ELPQGFPGGPETFEMIALFIYGSSTFIDPFNVAALRCAAEFLEMTEYCSNLCERFDLY   |
| <i>F. sylvatica</i>   | ELPQGFPGGPETFEMIALFIYGSSTLIDPFNVAALRCAAEFLIMTEYCSNLCERFDLY   |
| <i>F. excelsior</i>   | TLPNSFPGGPETFEMIALFIYGSSTLVDPFNVAALRCAAEFLQMTEDYGSNLCERFDLY  |

|                       |                                                             |
|-----------------------|-------------------------------------------------------------|
| <i>S. robusta</i>     | LNOVVLQSWDDTLIVLQKCOALLPWEELLIVSRGIESLAFMACMEILDPERRRDRPVVT |
| <i>P. chinensis</i>   | LNOVVLQSWDDTLIVLQKCOALLPWEELLIVSRGIESLAFMACMEILDPERRRDRPVVT |
| <i>H. chinensis</i>   | ..VVLQSWDDTLIVLQKCOALLPWEELLIVSRGIESLAFMACMEILDPERRRDRPVVT  |
| <i>D. turbinatus</i>  | LNOVVLQSWDDTLIVLQKCOALLPWEELLIVSRGIESLAFMACMEILDPERRRDRPVVS |
| <i>V. mangachapoi</i> | LNOVVLQSWDDTLIVLQKCOALLPWEELLIVSRGIESLAFMACMEILDPERRRQPVVT  |
| <i>B. pendula</i>     | LNOVVLQSWDDTLIVLQKCOALLPWEELLIVSRGIESLAFMACMEILDPERRRDRPVVT |
| <i>O. rehdieriana</i> | LNOVVLQSWDDTLIVLQKCOALLPWEELLIVSRGIESLAFMACMEILDPERRRDRPVVT |
| <i>Q. robur</i>       | LNOVVLQSWDDTLIVLQKCOALLPWEELLIVSRGIESLAFMACMEILDPERRRQPVVT  |
| <i>F. sylvatica</i>   | LNOVVLQSWDDTLIVLQKCOALLPWEELLIVSRGIESLAFMACMEILDPERRRQPVVT  |
| <i>F. excelsior</i>   | LNOVVLQSWDDTLIVLQKCOALLPWEELLIVSRGIESLAFMACMEILDPERRRHPVVT  |

|                       |                                                                  |
|-----------------------|------------------------------------------------------------------|
| <i>S. robusta</i>     | LEALA GEAWSHEAGKTIVSQELWIKDLTALPFGFFKRIIGSLRRQGMKEKVFVSPIIIVFYT  |
| <i>P. chinensis</i>   | LEALA GEAWSYEAAGKTIVSQELWIKDLTALPFGFFKRIIGSLRRQGMKEKVFVSPIIIVFYT |
| <i>H. chinensis</i>   | LEALA GEAWSCEAGKTIVSQELWIKDLTALPFGFFKRIIGSLRRQGMKEKVFVSPMIIVFYA  |
| <i>D. turbinatus</i>  | LEALA GEAWSCEAGKTIVSQELWIKDLTALPFGFFKRIIGSLRRQGMKEKVFVSPIIIVFYA  |
| <i>V. mangachapoi</i> | LEALA GEAWSCEAGKTIVSQELWIKDLTALPFGFFKRIIGSLRRQGMKEKVFVSPIIIVFYT  |
| <i>B. pendula</i>     | LEALASQAWNSETVKEIVSQDLWIKDLTALPFGFFKRIIGSLRRQGMKEKVFVSPIIIVFYA   |
| <i>O. rehdieriana</i> | LEALASQAWNSETVKEIVSQDLWIKDLTALPFGFFKRIIGSLRRQGMKEKVFVSPIIIVFYA   |
| <i>Q. robur</i>       | LEALASQAWSCEVKEIVSQDLWIKDLTALPFGFFKRIIGSLRRQGMKEKVFVSPIIIVFYT    |
| <i>F. sylvatica</i>   | LEALASQAWSCEVKEIVSQDLWIKDLTALPFGFFKRIIGSLRRQGMKEKVFVSPIIIVFYT    |
| <i>F. excelsior</i>   | IKALAHQHWTNQRLNDVMSHDLLIKDLTALPFLFFKRIIGSLRRQGMKEKVFVSPIIIVFYV   |

|                       |                                                               |
|-----------------------|---------------------------------------------------------------|
| <i>S. robusta</i>     | NKWILSQKTHQFWEKASPKMGENDTNIKFSVILQGIIDLLPIGEEKASRAIPVGFYFALLS |
| <i>P. chinensis</i>   | NKWILSQKTHQFWEKASPKMGENDTNIKFSVILQGIIDLLPMGEEKASRAIPVGFYFALLS |
| <i>H. chinensis</i>   | NKWILSQKTHQFWEKASPKMGENDTNIKFSVILQGIIDLLPMGEEKASRAIPVGFYFALLS |
| <i>D. turbinatus</i>  | NKWILSQKTHQFWEKASPKMGENDTNIKVSVILQGIIDLLPMGEEKASRAIPVGFYFALLS |
| <i>V. mangachapoi</i> | NKWILSQKTHQFWEKASPKMGENDTNIDVSVILQGIIDLLPMGEEKASRAIPVGFYFALLS |
| <i>B. pendula</i>     | NKWVSKKTRQFWESSAEKIGDDTNRKVAAILQGIIDLLPMGEEKASRLIPVGFYFALLS   |
| <i>O. rehdieriana</i> | NKWVSKKTRQFWENSAEKIGDDTNCKVAAILQGIIDLLPMGEEKASRLIPVGFYFALLS   |
| <i>Q. robur</i>       | NKWVLSKTHQFWENSTERIGDDTNKVAAILQGIIDLLPMGEEKASRVIPVGFYFALLS    |
| <i>F. sylvatica</i>   | NKWVLSKTHQFWENSAEKIGDDTNKVAAILQGIIDLLPMGEEKASRVIPVGFYFALLS    |
| <i>F. excelsior</i>   | NKRILPNSV.....SKSRVDE.....LSIILGGIIDLPMGEEKAGKAI PVDFYFALLS   |



NDH

*S. robusta* RSLKFGLRSDRMVKLQDQIASMLHFAQVEDLHLQIGT.ESSISSKELAAALRSIFSTYVS  
*P. chinensis* RSLKFGLRSDSMVKLQDQIASMLHFAQVEDFSLQIGT.ESSISSKELTAMRSIFSTYVS  
*H. chinensis* RSLKFGLRSDSMVKLQDQIASMLHFAQVEDFHLQIGT.ESSISSKELAAALRSIFSTYVS  
*D. turbinatus* RSLKFGLRSDSMVKLQDQIASMLHFAQVEDFHLRIGT.QSISAKKVLAAMRSIFSTYVS  
*V. mangachapoi* RSLKFGLRSDSMVKLQDQIASMLHFAQVEDFHLRIGT.KAISSSKELAAALRSIFSTYVS  
*B. pendula* RSLKFGLRSDHVKLQDQIASRLQFAQVEDFILPKMGT.DSISGGIELATMBSIISTYVS  
*O. rehderiana* RSLKFGLRSDHVKLQDQIASMLQFAQVEDFILPKMGT.DSISGGIELATMBSIISTYVS  
*Q. robur* RSLKFGLRSD...KLDQDQIASMLHFAQVEDFHPKMG.ESSISSIELATMBSIISTYVS  
*F. sylvatica* RSLKFGFRSDNTVKLHDQIASMLHFAQVEDFHPKMG.KSISGGIELATMBSIISTYVS  
*F. excelsior* KSLKFGDLRNDRLKLDQDQIASMLHFAQVEDFILPKMG.NQSSISSCRELSIMBSIISTYVS

*S. robusta* .YKVEFNHTPSASNSTIAELWDTFIRVASDLEMGPQSFMEIETVPIISYRLNHDLLYRA  
*P. chinensis* .YKVEFNHTPSASNSTIAELWDTFIQVASDLEMGPQSFMEIETVPIISYRLNHDLLYSA  
*H. chinensis* .YKVEFNHTPSASNSTIAELWDTFIQVASDLEMGPQSFMEIETVPIISYRLNHDLLYRA  
*D. turbinatus* .YKGETNYNPSASNSTIAELWDTFMQVASDLEMGPQSFMEIETVPIISYRLNHDLLYRA  
*V. mangachapoi* .YKVEFNHTPSASNSTIAELWDTFIVQVASDLEMGPQSFMEIETVPIISYRLNHDLLYRA  
*B. pendula* .SNLDTNHTPSSTRNSVVAELWDVYLSHIVPDDIGPAREFMELVERVFNCSQSHDQLYRA  
*O. rehderiana* .SNLDTNHTPSSTRNSVVAELWDVYLSHIVPDPNMGPERFMELVERVFNCSQSHDQLYRA  
*Q. robur* .SNSDMIHTPSSTRNSVVAELWDVYLSHIVPDPNMGPERFMELVERVFNCSQSHDQLYRA  
*F. sylvatica* .SNSDTNHISSTRNSVVAELWDVYLSHIVPDPNMGPERFMELVERVFNCSQSHDQLYRA  
*F. excelsior* LYNTERNRTPSENNSVVAELWDLVLSQIATDSQLGCKRMDLIEETPISSRQSHDNLKYKT

*S. robusta* MNSFLQAHKDI SQEERGMVCKYLNCKKLSQEAACIEAVQNELMPLRLIVQALFVQQLNTHQ  
*P. chinensis* MNSFLQAHKDI SQEERGMVCKYLNCKKLSQEAACIEAVQNELMPLRLIVQALFVQQLNTHQ  
*H. chinensis* MNSFLQAHKDI SQEERGMVCKYLNCKKLSQEAACIEAVQNELMPLRLIVQALFVQQLNTHQ  
*D. turbinatus* MNSFLQAHKDI SQEERGMVCKYLNCKKLSQEAACIEAVQNELMPLRLIVQALFVQQLNTHQ  
*V. mangachapoi* MNSFLQAHKDI SQEERGMVCKYLNCKKLSQEAACIEAVQNELMPLRLIVQALFVQQLNTHQ  
*B. pendula* MNTFLQAHPSISQEEKGAVCRYLNCKKLSQEAACIDAVQNELMPLRLIVQALFVQQLNTHQ  
*O. rehderiana* MNTFLQAHPSISQEEKGAVCRYLNCKKLSQEAACIDAVQNELMPLRLIVQALFVQQLNTHQ  
*Q. robur* MNTFLQAHPSISQEEKGAVCRYLNCKKLSQEAACIEAVQNELMPLRLIVQALFVQQLNTHQ  
*F. sylvatica* MNTFLQAHPSISQEEKGAVCRYLNCKKLSQEAACIEAVQNELMPLRLIVQALFVQQLNTHQ  
*F. excelsior* LNNFLQAHPSISQDEKGAVCRYLNCKKLSQEAACIEAVQNELMPLRLIVQALFVQQLNTHQ

*S. robusta* AFKECSESFRT...GPFSGSVPSRCPNPKSILGES...PYTDGAEEGSSKPLSFLLONE  
*P. chinensis* AFKECSESFRT...GPFSGSVPSRCPNPKSILGES...PYTDGAEEGSSKPLSFLLONE  
*H. chinensis* AFKECSESFRT...GPFSGSVPSRCPNPKSILGES...PFTGTEEGSSKPLSFLLONE  
*D. turbinatus* AFKECSESFRT...GPFSGSVPSRCPNPKSILGES...PYTDGAEEGSSKPLSFLLONE  
*V. mangachapoi* AFKECSESFRT...GTFSGSLPSRCPNPKSILGES...PYTDGAEEGSSKPLSFLLONE  
*B. pendula* AFRECSDFRHAHCGEFSGSLSSRYPNPKSILGES...PYTDGAEPPG.RRPLSFLLOKD  
*O. rehderiana* AFRECSDFRHAHCGEFSGSLSSRYPNPKSILGES...PYTDGAEPPG.RRPLSFLLOKD  
*Q. robur* AFRECSDFRHAHCGEFSGSLSSRYPNPKSILGES...PYTDGAEPPG.GRPLSFLLOKD  
*F. sylvatica* AFKECSESFRT...GPFSGSVPSRCPNPKSILGES...PYTDGAEPPG.SRPLSFLLOKD  
*F. excelsior* AFRECSDFRHAHCGEFSGSLSSRYPNPKSILGES.PMPYIKGSEGGSSKPLSFLLOKD

*S. robusta* LAIDKDF...RKDYESTSFRIQNLKELMSLKRRLQHLNMSKNSGNSNKT.KSG.KT  
*P. chinensis* LAIDKDF...RNDYESTSFRIQNLKELMSLKRRLQHLNMSKNSGNSNKT.KSS.KT  
*H. chinensis* LAIDKDF...RKDYESTSFRIQNLKELMSLKRRLQHLNMSKNSGNSNKT.KSS.KT  
*D. turbinatus* LVIDKDF...RKDYESTSFRIQNLKELMSLKRRLQHLNMSKNSGNSNKT.KSS.KT  
*V. mangachapoi* LAIDKDF...RKDYESTSFRIQNLKELVSLKRRLQHLNMSKNTESNDTKSS.KT  
*B. pendula* IS...PEFS...RNEFESTSLRIQNLKELMSLKRRLQHLNMSKNTESNDTKSS.KT  
*O. rehderiana* SS...PEFS...RNEFESTSLRIQNLKELMSLKRRLQHLNMSKNTESNDTKSS.KT  
*Q. robur* LAMQRPDFS...RQEFESTSFRIQNLKELMSLKRRLQHLNMSKNTESNDTKSS.KT  
*F. sylvatica* LTMQRPEFS...RQEFESTSFRIQNLKELMSLKRRLQHLNMSKNTESNDTKSS.KT  
*F. excelsior* LTTSSSEFSSEFPKRDYESTSFRIQNLKELMSLKRRLQHLNMSKNTESNDTKSS...EP

*S. robusta* HGLGKRSVSKRGNPFQGE.TGCIGSVNFASORRYASRLKVICRFALFGSRKSKRKQAS  
*P. chinensis* HGLGKRSVSKRGNPFQGE.TGCIGSVNFASORRYASRLKVICRFALFGSRKSKRKQAS  
*H. chinensis* HGLGKRSVSKRGNPIGOV.TGCIGSVNFASORRYASRLKVICRFALFGSRKSKRKQAS  
*D. turbinatus* YGLGKRSVSKRGNPFQGE.TGCIGSVNFASORRYASRLKVICRFALFGSRKSKRKQAS  
*V. mangachapoi* YGLGKRSVSKRGNPFQGE.TGCIGSVNFASORRYASRLKVICRFALFGSRKSKRKQAS  
*B. pendula* YGMESSRSLSKRKNPLGOV.TGCIGSVNFASORRYASRLKVICRFALFGSRKSKRKQAS  
*O. rehderiana* YGMESSRSLSKRKNPLGOV.TGCIGSVNFASORRYASRLKVICRFALFGSRKSKRKQAS  
*Q. robur* YGMESSRSLSKRKNPLGOV.TSCIGSVNFASORRYASRLKVICRFALFGSRKSKRKQAS  
*F. sylvatica* YGMESSRSLSKRKNPLGOV.TSCIGSVNFASORRYASRLKVICRFALFGSRKSKRKQAS  
*F. excelsior* YGLGERRMSKKNPLGOVNASIGTINFASORRYANRRLKVLQKISLFGGRSKRKRPVAA



S GRPE

|                       |                                                                |
|-----------------------|----------------------------------------------------------------|
| <i>S. robusta</i>     | MATLLKT.PPLKAPPLAWRPTPI SLKSPKPCVSVFRHRIHSTGIPRRS SLRLD.SAPSLR |
| <i>P. chinensis</i>   | MATLLKT.PPLKAPPPAWRPTPI SLKSPKPCVSVFRHRIHSTGIPRRS SLRLD.SAPSLR |
| <i>H. chinensis</i>   | MATLLKAPPLKAPPLAWRPTPI SLKSPKPCVSVFRHRIHSTGIPRRGRALRLD.SAPSLR  |
| <i>D. turbinatus</i>  | MATLLKT.PPLKAPPLAWRPTTI SLKSPKPCVSVFRHRIHSGGIPRRS SLRLD.SPESLR |
| <i>V. mangachapoi</i> | MATLLKT.PPLKAPPVWRPTPI SLKSPKPCVSVFRHRIHSTGIPSRSLRLD.SAPSLR    |
| <i>B. pendula</i>     | .....MRGED..GIEF.....SIRFG.....                                |
| <i>O. rehderiana</i>  | MATVLT.PTIRVALPPRPTTETS SKSEKPCVSVFRH..STPKHSRLS SLRFS.RIPSLR  |
| <i>Q. robur</i>       | .....MFD.....                                                  |
| <i>F. sylvatica</i>   | MATVLT.PTIRAPFPPR..STISSKSKPCVSVFRHSTTKPSLP.LTSLRFSHHLPSLR     |
| <i>F. excelsior</i>   | .....MVVLG.....                                                |

|                       |                                                            |
|-----------------------|------------------------------------------------------------|
| <i>S. robusta</i>     | FVKLVSLAASGG.ETETAESKEQVQETE.....IEDSSDGAVAVE              |
| <i>P. chinensis</i>   | FVKLVSLAASGG.ETETAESKEQVQETE.....IEDSSDGAVAVK              |
| <i>H. chinensis</i>   | FVKLVSLAASGG.ETETAESKEQVQETE.....IEDSSDGAVAVE              |
| <i>D. turbinatus</i>  | FVKLVSLASNGG.ETETAESKEQVRETE.....IEDSSDGAVAVE              |
| <i>V. mangachapoi</i> | FVKLVSLAASGG.ETETAESKEQVQATE.....IEDSSDGAVAVE              |
| <i>B. pendula</i>     | VEF.....AEDILDGAVRIE                                       |
| <i>O. rehderiana</i>  | FVKFVPPFASSG..DTETTDTQEEVQQPQQ.....AEDILDGADRNE            |
| <i>Q. robur</i>       | .....RDIVDGAAVVE                                           |
| <i>F. sylvatica</i>   | FVKFVPPFASSGETETTETQDEVQEPQQEQVQVRGIDLEARKERNIYEDIEDGAVGVE |
| <i>F. excelsior</i>   | .....NLDGVVGV                                              |

|                       |                                                              |
|-----------------------|--------------------------------------------------------------|
| <i>S. robusta</i>     | DGAG.DENS DVEEISTSAVLALLQSYKEALASNNEAKVAFESFLOSIEDEKVDLEKVVV |
| <i>P. chinensis</i>   | DGAG.DENS DVEEISTSAVLALLQSYKEALASNNEPKVAFESFLOSIEENKVDLENKVV |
| <i>H. chinensis</i>   | DGAG.DES DVEDISTSAVLALLQSYKEALASNNEAKVAFESFLOSIEDEKVDLEKVI.  |
| <i>D. turbinatus</i>  | DGAG.DES DVEEISAVLALLQSYKEALASNNEAKVAFESFLOSIEDEKVDLEKVVV    |
| <i>V. mangachapoi</i> | DGVD.DESS DVEEVPASAVLALLQSYKEALASNNEAKAFESFLOSIEDEKVDLEKVVV  |
| <i>B. pendula</i>     | DGTS.DDVTGAEVPPSVIISLLRSYKEALASNDESRVAFESLKSVEDEKISLERKVT    |
| <i>O. rehderiana</i>  | DVTS.DDVTGDEEVPSPVVISLLOS YKEALASNDESRVAFESLKSVEDEKISLERKVT  |
| <i>Q. robur</i>       | DISSDDVNGAEVPPSAIVSSLQLYKEALASNDESGVAFESLKSIEBEKISLERKVA     |
| <i>F. sylvatica</i>   | DGTSDDINGNEEVPSAILSSLQLYKEALASNDESRVAFESLKSIEBEKISLERKVA     |
| <i>F. excelsior</i>   | .....SDGDTVAEPPASAVVASLNLVREALANNDEAKVADISELLESIESEKTELEKREA |

|                       |                                                                 |
|-----------------------|-----------------------------------------------------------------|
| <i>S. robusta</i>     | SLSEELATEKDRILRI SADFDFNFRKRTERE RLSLVKNAQGEVLENLLSVLDNFERAKDQI |
| <i>P. chinensis</i>   | SLSEELATEKDRILRI SADFDFNFRKRTERE RLSLVKNAQGEVLENFLPVDNFERAKDQI  |
| <i>H. chinensis</i>   | .....GTEKDRILRI SADFDFNFRKRTERE RLSLVKNAQGEVLENLLPVDNFERAKDQI   |
| <i>D. turbinatus</i>  | SLSEELATEKDRILRI SADFDFNFRKRTERE RLSLVKNAQGEVLENLLPVDNFERAKDQI  |
| <i>V. mangachapoi</i> | SLSEELATEKDRILRI SADFDFNFRKRTERE RLSLVKNAQGEVLENLLPVDNFERAKDQI  |
| <i>B. pendula</i>     | SLSEELATEKARILRI SADFDFNFRKRTERE RLSLVKNAQGEVLENLLPVDNFERAKDQI  |
| <i>O. rehderiana</i>  | YLSEELATEKARILRI SADFDFNFRKRTERE RLSLVKNAQGEVLENLLPVDNFERAKDQI  |
| <i>Q. robur</i>       | SLSEELATEKERILRI SADFDFNFRKRTERE RLSLVKNAQGEVLENLLPVDNFERAKDQI  |
| <i>F. sylvatica</i>   | SLSEELATEKDRILRI SADFDFNFRKRTERE RLSLVKNAQGEVLENLLPVDNFERAKDQI  |
| <i>F. excelsior</i>   | TLSEELATEKDRILRI SADFDFNFRKRTERE RLSLVKNAQGEVLENLLPVDNFERAKDQI  |

|                       |                                                               |
|-----------------------|---------------------------------------------------------------|
| <i>S. robusta</i>     | KVATEGEEKINNSYQSIYKQFIEILGSLGVV VETVGCFFDPMLHEAIMREDSTDYEEGI  |
| <i>P. chinensis</i>   | KVATEGEEKINNSYQSIYKQFIEILGSLGVV VETVGCFFDPMLHEAIMRDDSTDYEEGI  |
| <i>H. chinensis</i>   | KVATEGEEKINNSYQSIYKQFIEILGSLGVV VETVGCFFDPMLHEAIMREDSTDYEEGI  |
| <i>D. turbinatus</i>  | KVATEGEEKINNSYQSIYKQFIEILGSLGVV VETVGCFFDPMLHEAIMREDSTDYEEGI  |
| <i>V. mangachapoi</i> | KVATEGEEKINNSYQSIYKQFIEILGSLGVV VETVGCFFDPMLHEAIMREDSTDYEEGI  |
| <i>B. pendula</i>     | KVATEGEEKINNSYQSIYKQFIEILGSLGVV VETVGCFFDPMLHEAIMREDSTDYEEGI  |
| <i>O. rehderiana</i>  | KVATEGEEKINNSYQSIYKQFIEILGSLGVV VETVGCFFDPMLHEAIMREDSTDYEEGI  |
| <i>Q. robur</i>       | KVATEGEEKINNSYQSIYKQFIEILGSLGVV VETVGCFFDPMLHEAIMREDSTDYEEGI  |
| <i>F. sylvatica</i>   | KVATEGEEKINNSYQSIYKQFIEILGSLGVV VETVGCFFDPMLHEAIMREDSTDYEEGI  |
| <i>F. excelsior</i>   | KVATEGEEKINNSYQSIYKQFIEILGSLGVV VETVGCFFDPMLHEAIMREGSTEFKDIGI |

|                       |                                                               |
|-----------------------|---------------------------------------------------------------|
| <i>S. robusta</i>     | ILQEFRKGFKLGDRLLRPA MVKVS.....AGPGPAKPAEVESSEGANTSEATQDSEETIN |
| <i>P. chinensis</i>   | ILQEFRKGFKLGDRLLRPA MVKVS.....AGPGPAKPAEVESSEGANTSEATQDSEETIN |
| <i>H. chinensis</i>   | ILQEFRKGFKLGDRLLRPA MVKVS.....AGPGPAKPAEVESSEGANTSEATQDSEETIN |
| <i>D. turbinatus</i>  | ILQEFRKGFKLGDRLLRPA MVKVS.....AGPGPAKPAEVESSEGANTSEATQDSEETIN |
| <i>V. mangachapoi</i> | VLDEFSRNF SQFCSGFMKTWIRF.....AGPGPAKPAEVESSEGANTSEATQDSEETIN  |
| <i>B. pendula</i>     | VIEEFRKGFKLGDRLLRPA MVKVS.....AGPGPAKPAEVESSEGANTSEATQDSEETIN |
| <i>O. rehderiana</i>  | VIEEFRKGFKLGDRLLRPA MVKVS.....AGPGPAKPAEVESSEGANTSEATQDSEETIN |
| <i>Q. robur</i>       | ILQEFRKGFKLGDRLLRPA MVKVSAGPGPAKPAEVESSEGANTSEATQDSEETIN      |
| <i>F. sylvatica</i>   | ILQEFRKGFKLGDRLLRPA MVKVS.....AGPGPAKPAEVESSEGANTSEATQDSEETIN |
| <i>F. excelsior</i>   | VLDEFRKGFKLGDRLLRPA MVKVS.....AGPGPAKPAEVESSEGANTSEATQDSEETIN |





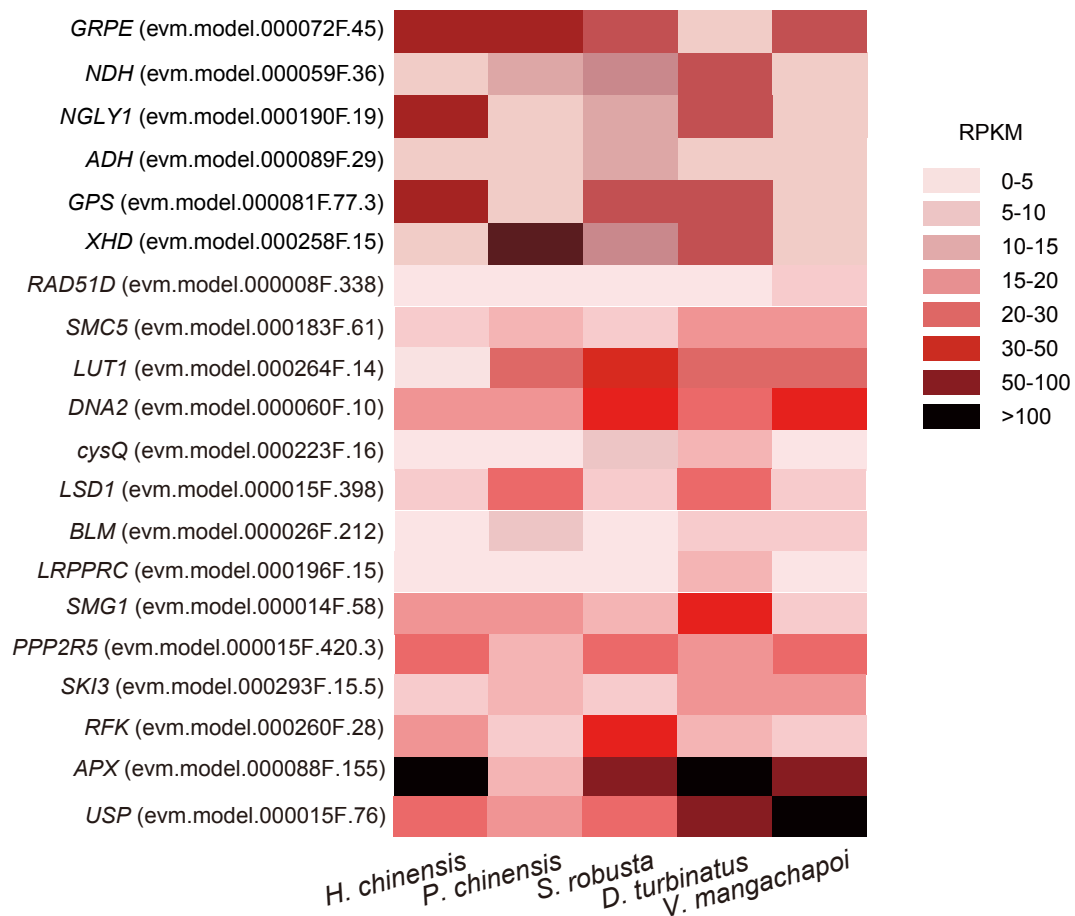

**Supplementary Figure 8. Expression of the 20 positively selected genes involved in the responses of plants to environmental stresses in the comparisons between the genomes of our focal Dipterocarpoideae species and those of five temperate tree species comparisons of genomes.** The function of each gene is shown in Supplementary Data 2. Expression level of each gene is estimated based on the transcriptome data (Illumina RNA-seq) for gene structure prediction (see Supplementary Table 21). RPKM: reads per kilobase per million mapped reads. Source data are provided as a Source Data file.

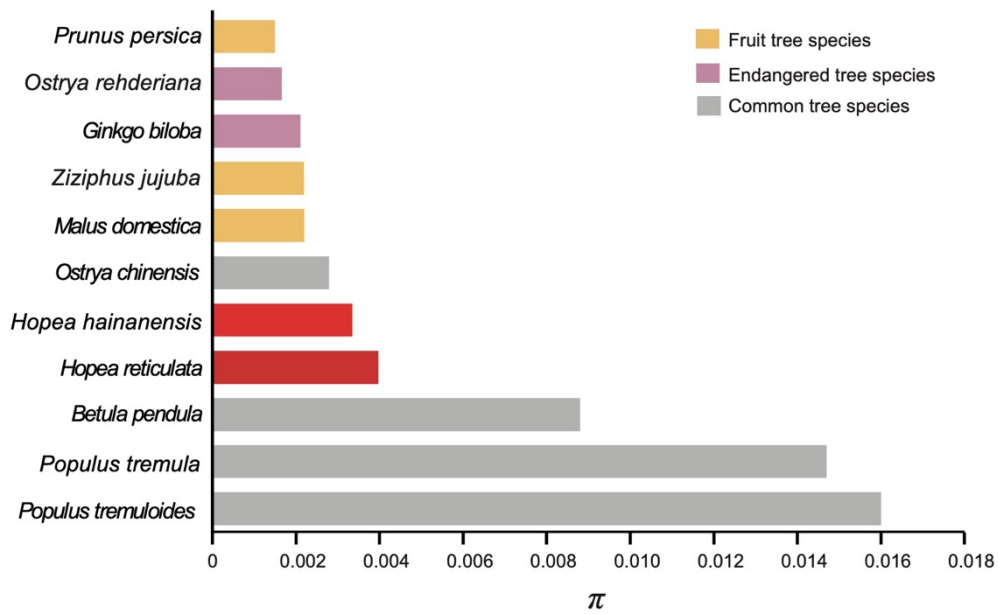

**Supplementary Figure 9. Nucleotide diversity ( $\pi$ ) of *Hopea hainanensis* and *H. reticulata* populations at the genomic level, with further comparisons with  $\pi$  values from the genomes of other nine tree species<sup>6,7,8,9,10,11,12</sup>. Source data are provided as a Source Data file.**



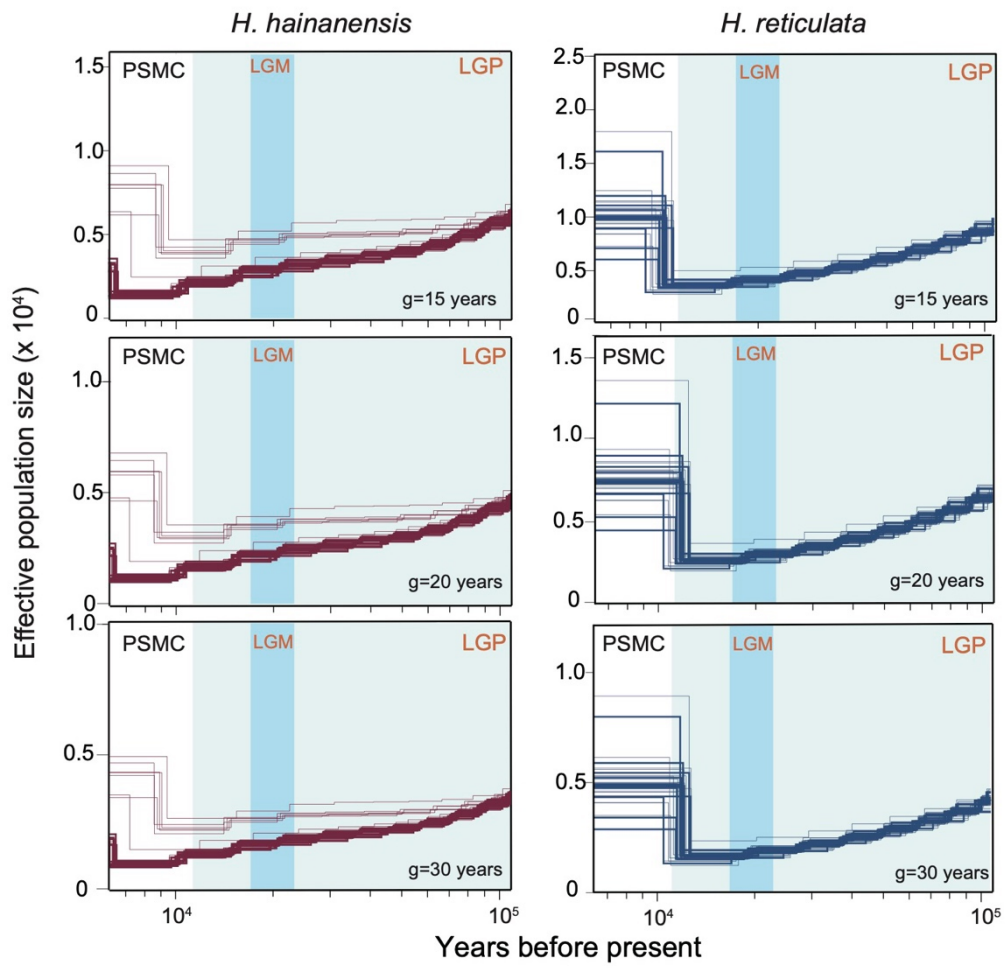

**Supplementary Figure 10. Demographic dynamics of *H. hainanensis* (n=30) and *H. reticulata* (n=32) inferred using PSMC.**

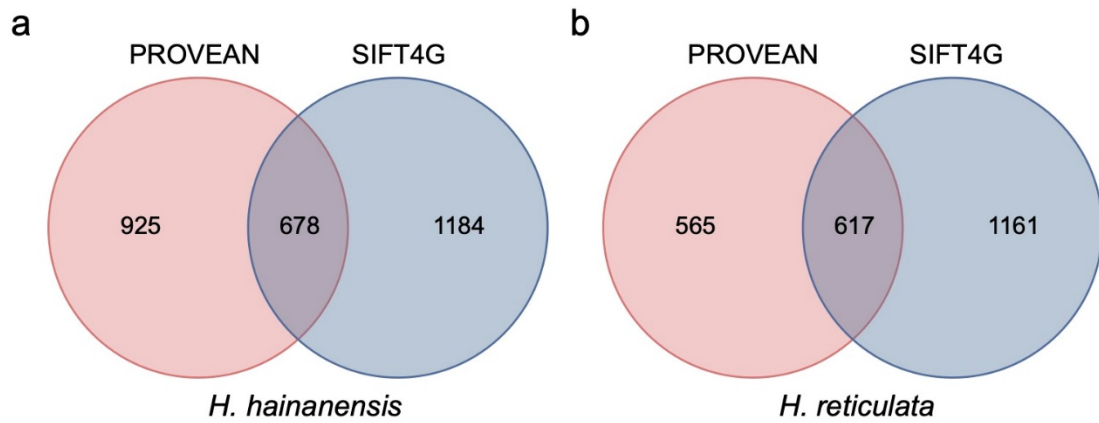

**Supplementary Figure 11. Venn diagrams of the deleterious mutations (DDMs) detected within *H. hainanensis* (n=30) and *H. reticulata* (n=32) populations based on the results from analyses using PROVEAN and SIFT4G.**



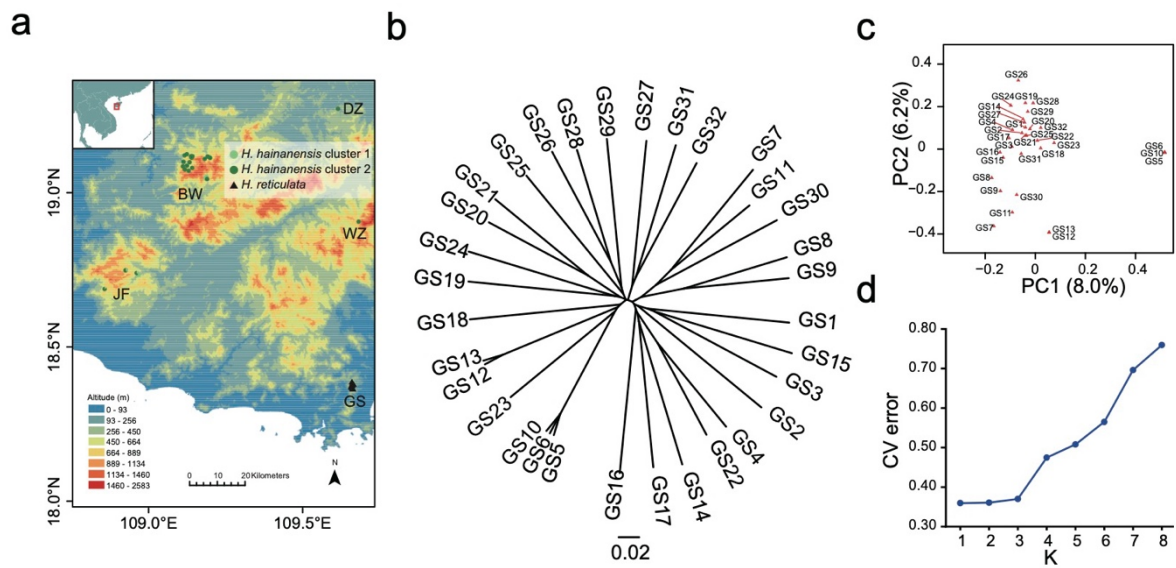

**Supplementary Figure 12. The sampling locations of wild *H. hainanensis* and *H. reticulata* trees for resequencing and analysis of population genomics (a), neighbour-joining phylogenetic tree (b), principal component analysis (PCA) (c) and results of genetic structure analysis for the *H. reticulata* (n=32) population using genetic clustering (d). The sampling map was drawn by Chao-Nan Liu. All sampled trees are located on Hainan Island, China. BW: Bawangling, DZ: Danzhou city, JF: Jianfengling, WZ: Wuzhi mountain, and GS: Ganshiling. Cross-validation error (CV error) of each assumed genetic group number ( $K$ ) was estimated, and assignment of sampled trees were performed according to the first two principal components from PCA analysis. Source data of Supplementary Fig. 12d are provided as a Source Data file.**

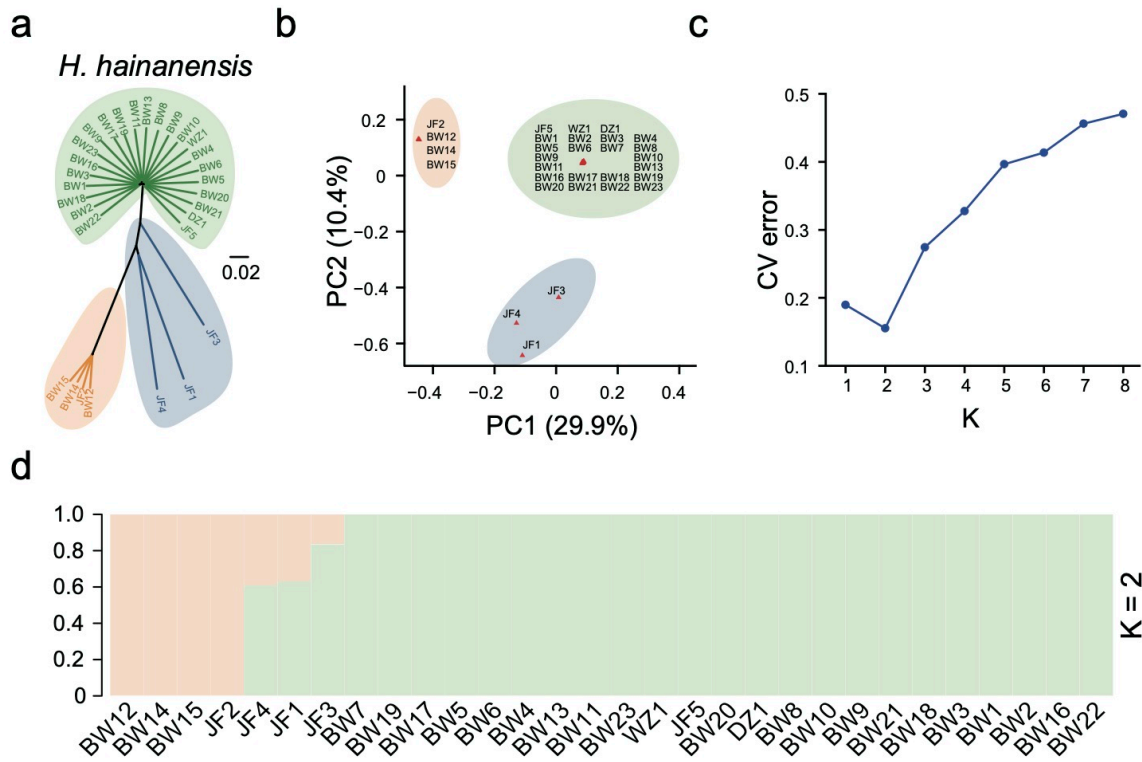

**Supplementary Figure 13. Results of neighbour-joining phylogenetic tree (a), principal component analysis (PCA) (b), and genetic clustering (c, d) for the sampled trees of *H. hainanensis* (n=30).** Cross-validation error (CV error) for each assumed genetic group number ( $K$ ) was estimated, and assignment of sampled trees were performed according to the first two principal components from PCA analysis. Source data of Supplementary Fig. 13c are provided as a Source Data file.



## Supplementary Tables

**Supplementary Table 1. The results of genome size estimation using flow cytometry setting the genome of *Solanum lycopersicum* (genome size: 2.07 Gb; 2C = 2.12) as the reference.**

| Sample                      | Fuorescence intensity | CV error (%) | 2C (pg) | Genome size (Gb) | Ploidy |
|-----------------------------|-----------------------|--------------|---------|------------------|--------|
| <i>Hopea chinensis</i>      | 18.20                 | 4.30         | 0.81    | 0.79             | 2X     |
| <i>Solanum lycopersicum</i> | 47.40                 | 1.76         | 2.12    | 2.07             |        |
| <i>Hopea hainanensis</i>    | 29.20                 | 4.71         | 1.60    | 1.56             | 4X     |
| <i>Solanum lycopersicum</i> | 38.80                 | 3.61         | 2.12    | 2.07             |        |
| <i>Hopea reticulata</i>     | 26.90                 | 4.88         | 1.64    | 1.60             | 4X     |
| <i>Solanum lycopersicum</i> | 34.70                 | 3.29         | 2.12    | 2.07             |        |

**Supplementary Table 2. Statistics of clean sequencing data.** Pacbio CLR (continuous long-read) reads were generated for *H. hainanensis*, *H. reticulata*, *H. chinensis* and *P. chinensis*, and Pacbio HiFi (high fidelity) reads were generated for *S. robusta*, *D. turbinatus* and *V. mangachapoi*. Depth of sequencing was calculated via clean sequencing data divided by the genome size estimated by *k*-mer analysis (see Table 1).

| Species               | Abbreviation | Illumina reads |           | Pacbio reads |           | Hi-C reads |           |
|-----------------------|--------------|----------------|-----------|--------------|-----------|------------|-----------|
|                       |              | Data (Gb)      | Depth (X) | Data (Gb)    | Depth (X) | Data (Gb)  | Depth (X) |
| <i>H. hainanensis</i> | Hhai         | 263.53         | 168.53    | 97.17        | 62.14     | 77.32      | 49.45     |
| <i>H. reticulata</i>  | Hret         | 77.13          | 51.40     | 87.34        | 58.21     | 100.29     | 66.84     |
| <i>H. chinensis</i>   | Hchi         | 51.16          | 147.66    | 42.63        | 123.04    | 45.19      | 130.43    |
| <i>P. chinensis</i>   | Pchi         | 79.65          | 254.36    | 124.88       | 398.80    | 47.11      | 136.00    |
| <i>S. robusta</i>     | Srob         | 80.59          | 244.98    | 6.64         | 20.18     | 50.29      | 152.87    |
| <i>D. turbinatus</i>  | Dtur         | 82.38          | 220.76    | 20.72        | 55.52     | 57.42      | 153.88    |
| <i>V. mangachapoi</i> | Vman         | 69.98          | 154.55    | 8.38         | 18.51     | 47.56      | 105.01    |



**Supplementary Table 3. Proportions of highly homologous regions in each chromosome of *H. hainanensis* and *H. reticulata* according to the coverage depth of Illumina pair-end reads for *k*-mer analysis.** The overall sequencing depth was 144X (223.69 Gb/1.56 Gb) for *H. hainanensis* and 51X (77.13 Gb/1.50 Gb) for *H. reticulata*. Regions with coverage depths of 216X – 360X, 360X– 504X and larger than 504X for *H. hainanensis* and of 75.5X – 127.5X, 127.5X – 178.5X and larger than 178.5X for *H. reticulata* (i.e., 1.5 – 2.5, 2.5 – 3.5 and larger than 3.5 folds of overall coverage depth) were thought to be the overlaps of two, three and four sets chromosomes, respectively. The total length of overlapped region was estimated to be 361.86 Mb for *H. hainanensis* and 245.66 Mb for *H. reticulata*, accounting for most (77.9% for *H. hainanensis* and 93.6% for *H. reticulata*) of the difference between the assembled and the estimated genome size (see Methods).

| Chromosome_ID | <i>H. hainanensis</i>  |           |           | <i>H. reticulata</i> |                        |              |               |         |
|---------------|------------------------|-----------|-----------|----------------------|------------------------|--------------|---------------|---------|
|               | Chromosome length (bp) | 216X–360X | 360X–504X | >504X                | Chromosome length (bp) | 76.5X–127.5X | 127.5X–178.5X | >178.5X |
| Chr1          | 56,060,860             | 0.2368    | 0.0389    | 0.0296               | 66,518,347             | 0.2481       | 0.0207        | 0.0054  |
| Chr2          | 50,862,877             | 0.2322    | 0.0083    | 0.0022               | 62,617,095             | 0.2431       | 0.0179        | 0.0040  |
| Chr3          | 47,502,918             | 0.1823    | 0.0187    | 0.0120               | 52,787,304             | 0.2071       | 0.0125        | 0.0030  |
| Chr4          | 25,558,352             | 0.0630    | 0.0055    | 0.0000               | 29,144,642             | 0.3376       | 0.0477        | 0.0079  |
| Chr5          | 52,060,348             | 0.2239    | 0.0035    | 0.0012               | 69,171,435             | 0.1840       | 0.0250        | 0.0039  |
| Chr6          | 51,918,603             | 0.2779    | 0.0270    | 0.0252               | 61,919,302             | 0.1649       | 0.0241        | 0.0058  |
| Chr7          | 45,882,048             | 0.2183    | 0.0179    | 0.0111               | 44,322,556             | 0.1633       | 0.0244        | 0.0020  |
| Chr8          | 29,356,050             | 0.0651    | 0.0020    | 0.0003               | 26,589,551             | 0.1835       | 0.0267        | 0.0034  |
| Chr9          | 53,961,569             | 0.3009    | 0.0445    | 0.0752               | 61,289,770             | 0.2457       | 0.0238        | 0.0073  |
| Chr10         | 52,201,287             | 0.2773    | 0.0063    | 0.0019               | 54,261,871             | 0.2230       | 0.0140        | 0.0024  |
| Chr11         | 38,126,576             | 0.1828    | 0.0121    | 0.0100               | 46,031,668             | 0.1853       | 0.0130        | 0.0059  |
| Chr12         | 24,842,783             | 0.0535    | 0.0008    | 0.0000               | 25,649,789             | 0.1930       | 0.0304        | 0.0062  |
| Chr13         | 44,572,804             | 0.3358    | 0.0121    | 0.0011               | 54,107,632             | 0.2173       | 0.0181        | 0.0031  |
| Chr14         | 44,276,399             | 0.3243    | 0.0486    | 0.0788               | 46,457,576             | 0.2561       | 0.0198        | 0.0045  |
| Chr15         | 36,124,573             | 0.2729    | 0.0246    | 0.0075               | 44,011,096             | 0.2493       | 0.0195        | 0.0052  |
| Chr16         | 22,986,945             | 0.0622    | 0.0004    | 0.0000               | 41,307,522             | 0.2041       | 0.0136        | 0.0019  |
| Chr17         | 51,368,458             | 0.3222    | 0.0444    | 0.0779               | 49,638,002             | 0.2877       | 0.0234        | 0.0068  |

---

|       |               |        |        |        |               |        |        |        |
|-------|---------------|--------|--------|--------|---------------|--------|--------|--------|
| Chr18 | 43,707,180    | 0.3276 | 0.0078 | 0.0014 | 48,129,990    | 0.3171 | 0.0322 | 0.0087 |
| Chr19 | 28,019,024    | 0.2591 | 0.0300 | 0.0232 | 44,406,130    | 0.3137 | 0.0277 | 0.0068 |
| Chr20 | 22,359,377    | 0.0894 | 0.0009 | 0.0009 | 31,106,232    | 0.2845 | 0.0267 | 0.0045 |
| Chr21 | 42,884,734    | 0.2733 | 0.0581 | 0.0212 | 50,897,133    | 0.1819 | 0.0173 | 0.0067 |
| Chr22 | 41,336,008    | 0.2288 | 0.0068 | 0.0010 | 46,730,095    | 0.2382 | 0.0201 | 0.0077 |
| Chr23 | 33,386,394    | 0.1836 | 0.0210 | 0.0099 | 43,902,429    | 0.2237 | 0.0141 | 0.0023 |
| Chr24 | 22,647,172    | 0.0645 | 0.0013 | 0.0000 | 16,233,104    | 0.1694 | 0.0074 | 0.0031 |
| Chr25 | 30,718,104    | 0.3955 | 0.0557 | 0.1045 | 34,780,442    | 0.3108 | 0.0210 | 0.0052 |
| Chr26 | 27,906,433    | 0.3973 | 0.0097 | 0.0018 | 31,998,611    | 0.3194 | 0.0441 | 0.0181 |
| Chr27 | 17,551,768    | 0.2813 | 0.0177 | 0.0188 | 25,311,145    | 0.2947 | 0.0245 | 0.0008 |
| Chr28 | 14,580,805    | 0.1385 | 0.0014 | 0.0007 | 20,671,113    | 0.3952 | 0.0556 | 0.0227 |
| Total | 1,052,760,449 | -      | -      | -      | 1,299,991,582 | -      | -      | -      |

---

**Supplementary Table 4. Lengths of assembled chromosomes for each focal species.** Note that only monoploid genome was assembled for all species except the two autotetraploid species *H. hainanensis* and *H. reticulata*.

| Chromosome ID | Chromosome length (bp) |                      |                     |                     |                   |                      |                       |
|---------------|------------------------|----------------------|---------------------|---------------------|-------------------|----------------------|-----------------------|
|               | <i>H. hainanensis</i>  | <i>H. reticulata</i> | <i>H. chinensis</i> | <i>P. chinensis</i> | <i>S. robusta</i> | <i>D. turbinatus</i> | <i>V. mangachapoi</i> |
| Chr1          | 56,060,860             | 66,518,347           | 58,999,814          | 47,060,898          | 52,458,056        | 40,721,971           | 35,234,553            |
| Chr2          | 50,862,877             | 62,617,095           | 50,750,874          | 43,239,849          | 50,588,708        | 26,050,962           | 56,851,045            |
| Chr3          | 47,502,918             | 52,787,304           | 53,466,247          | 51,893,975          | 54,130,500        | 35,475,413           | 39,502,375            |
| Chr4          | 25,558,352             | 29,144,642           | 51,441,790          | 46,059,081          | 48,473,062        | 32,353,911           | 37,717,841            |
| Chr5          | 52,060,348             | 69,171,435           | 44,472,741          | 39,227,045          | 42,867,569        | 45,090,292           | 40,985,457            |
| Chr6          | 51,918,603             | 61,919,302           | 46,293,359          | 29,970,300          | 46,457,883        | 29,150,171           | 49,753,518            |
| Chr7          | 45,882,048             | 44,322,556           | 32,845,991          | 51,556,864          | 31,767,639        | 26,610,888           | 43,556,076            |
| Chr8          | 29,356,050             | 26,589,551           | -                   | -                   | -                 | 29,516,284           | 36,579,020            |
| Chr9          | 53,961,569             | 61,289,770           | -                   | -                   | -                 | 42,617,143           | 33,201,765            |
| Chr10         | 52,201,287             | 54,261,871           | -                   | -                   | -                 | 28,594,060           | 29,296,269            |
| Chr11         | 38,126,576             | 46,031,668           | -                   | -                   | -                 | 32,794,201           | 36,846,320            |
| Chr12         | 24,842,783             | 25,649,789           | -                   | -                   | -                 | -                    | -                     |
| Chr13         | 44,572,804             | 54,107,632           | -                   | -                   | -                 | -                    | -                     |
| Chr14         | 44,276,399             | 46,457,576           | -                   | -                   | -                 | -                    | -                     |
| Chr15         | 36,124,573             | 44,011,096           | -                   | -                   | -                 | -                    | -                     |
| Chr16         | 22,986,945             | 41,307,522           | -                   | -                   | -                 | -                    | -                     |
| Chr17         | 51,368,458             | 49,638,002           | -                   | -                   | -                 | -                    | -                     |
| Chr18         | 43,707,180             | 48,129,990           | -                   | -                   | -                 | -                    | -                     |
| Chr19         | 28,019,024             | 44,406,130           | -                   | -                   | -                 | -                    | -                     |
| Chr20         | 22,359,377             | 31,106,232           | -                   | -                   | -                 | -                    | -                     |
| Chr21         | 42,884,734             | 50,897,133           | -                   | -                   | -                 | -                    | -                     |
| Chr22         | 41,336,008             | 46,730,095           | -                   | -                   | -                 | -                    | -                     |
| Chr23         | 33,386,394             | 43,902,429           | -                   | -                   | -                 | -                    | -                     |



---

|            |               |               |             |             |             |             |             |
|------------|---------------|---------------|-------------|-------------|-------------|-------------|-------------|
| Chr24      | 22,647,172    | 16,233,104    | -           | -           | -           | -           | -           |
| Chr25      | 30,718,104    | 34,780,442    | -           | -           | -           | -           | -           |
| Chr26      | 27,906,433    | 31,998,611    | -           | -           | -           | -           | -           |
| Chr27      | 17,551,768    | 25,311,145    | -           | -           | -           | -           | -           |
| Chr28      | 14,580,805    | 20,671,113    | -           | -           | -           | -           | -           |
| Total (bp) | 1,052,760,449 | 1,229,991,582 | 338,270,816 | 309,008,012 | 326,743,417 | 368,975,296 | 439,524,239 |

---

**Supplementary Table 5. Genome completeness assessments using CEGMA, BUSCO and Illumina sequencing data for *k*-mer analysis (see Supplementary Table 2).** A total of 248 core eukaryotic genes (CEGs) and 1,614 conserved embryophyta proteins (CEPs) were used in CEGMA and BUSCO assessments, respectively. LMG: the longest monoploid genome.

| Species                                       | CEGMA                         |                |                | BUSCO      |                |                | Illumina sequencing data |                     |
|-----------------------------------------------|-------------------------------|----------------|----------------|------------|----------------|----------------|--------------------------|---------------------|
|                                               | Type                          | Number of CEGs | Percentage (%) | Type       | Number of CEPs | Percentage (%) | Mapping ratio (%)        | Genome coverage (%) |
| <i>H. hainanensis</i> (four sets chromosomes) | Fully mapped CEGs             | 244            | 96.77          | Complete   | 1,598          | 99.0           | 97.38                    | 98.42               |
|                                               | Fully + partially mapped CEGs | 245            | 98.79          | Fragmented | 6              | 0.4            |                          |                     |
|                                               |                               |                |                | Missing    | 10             | 0.6            |                          |                     |
| <i>H. hainanensis</i> (LMG)                   | Fully mapped CEGs             | 226            | 91.13          | Complete   | 1,398          | 86.6           | 86.21                    | 99.81               |
|                                               | Fully + partially mapped CEGs | 232            | 93.55          | Fragmented | 26             | 1.6            |                          |                     |
|                                               |                               |                |                | Missing    | 190            | 11.8           |                          |                     |
| <i>H. reticulata</i> (four sets chromosomes)  | Fully mapped CEGs             | 236            | 95.16          | Complete   | 1,580          | 97.9           | 96.08                    | 92.38               |
|                                               | Fully + partially mapped CEGs | 242            | 97.58          | Fragmented | 3              | 0.2            |                          |                     |
|                                               |                               |                |                | Missing    | 31             | 1.9            |                          |                     |
| <i>H. reticulata</i> (LMG)                    | Fully mapped CEGs             | 223            | 89.92          | Complete   | 1,319          | 81.7           | 84.21                    | 97.12               |
|                                               | Fully + partially mapped CEGs | 227            | 91.53          | Fragmented | 34             | 2.1            |                          |                     |
|                                               |                               |                |                | Missing    | 261            | 16.2           |                          |                     |
| <i>H. chinensis</i>                           | Fully mapped CEGs             | 236            | 95.16          | Complete   | 1,533          | 95.0           | 94.45                    | 99.91               |
|                                               | Fully + partially mapped CEGs | 240            | 98.39          | Fragmented | 10             | 0.6            |                          |                     |
|                                               |                               |                |                | Missing    | 71             | 4.4            |                          |                     |
| <i>P. chinensis</i>                           | Fully mapped CEGs             | 236            | 95.16          | Complete   | 1,583          | 98.1           | 95.41                    | 99.84               |
|                                               | Fully + partially mapped CEGs | 239            | 96.37          | Fragmented | 7              | 0.4            |                          |                     |
|                                               |                               |                |                | Missing    | 24             | 1.5            |                          |                     |
| <i>S. robusta</i>                             | Fully mapped CEGs             | 236            | 95.16          | Complete   | 1,590          | 98.5           | 96.44                    | 99.99               |
|                                               | Fully + partially mapped CEGs | 239            | 96.37          | Fragmented | 7              | 0.4            |                          |                     |
|                                               |                               |                |                | Missing    | 17             | 1.1            |                          |                     |

|                       |                               |     |        |            |       |      |       |       |
|-----------------------|-------------------------------|-----|--------|------------|-------|------|-------|-------|
| <i>D. turbinatus</i>  | Fully mapped CEGs             | 245 | 98.79  | Complete   | 1,598 | 99.0 | 98.69 | 99.85 |
|                       | Fully + partially mapped CEGs | 248 | 100.00 | Fragmented | 3     | 0.2  |       |       |
|                       |                               |     |        | Missing    | 13    | 0.8  |       |       |
| <i>V. mangachapoi</i> | Fully mapped CEGs             | 229 | 92.34  | Complete   | 1,567 | 97.1 | 96.86 | 99.90 |
|                       | Fully + partially mapped CEGs | 234 | 94.35  | Fragmented | 3     | 0.2  |       |       |
|                       |                               |     |        | Missing    | 44    | 2.7  |       |       |



**Supplementary Table 6. Allele annotation among homologous chromosomes in *H. hainanensis* and *H. reticulata* genomes.** Number of allele-identified genes was calculated as four times of the total number of genes with four alleles across all the seven chromosome sets, three times of the total number of genes with three alleles, two times of the total number of genes with two alleles, and the total number of genes with one allele. Chromosome set: a group of clustered chromosomes containing four homologous chromosomes.

|                         | <i>H. hainanensis</i>   |                          |                        |                       | <i>H. reticulata</i>    |                          |                        |                       |
|-------------------------|-------------------------|--------------------------|------------------------|-----------------------|-------------------------|--------------------------|------------------------|-----------------------|
|                         | Genes with four alleles | Genes with three alleles | Genes with two alleles | Genes with one allele | Genes with four alleles | Genes with three alleles | Genes with two alleles | Genes with one allele |
| Chromosome set 1        | 612                     | 1,681                    | 1,762                  | 3,007                 | 345                     | 1,630                    | 2,211                  | 4,341                 |
| Chromosome set 2        | 503                     | 1,712                    | 1,663                  | 2,613                 | 248                     | 1,418                    | 1,954                  | 3,903                 |
| Chromosome set 3        | 498                     | 1,985                    | 1,939                  | 2,806                 | 371                     | 1,356                    | 2,005                  | 3,865                 |
| Chromosome set 4        | 391                     | 1,649                    | 1,809                  | 2,158                 | 336                     | 1,386                    | 1,855                  | 3,485                 |
| Chromosome set 5        | 365                     | 1,690                    | 1,822                  | 2,370                 | 165                     | 1,178                    | 2,200                  | 3,079                 |
| Chromosome set 6        | 440                     | 1,517                    | 1,478                  | 2,231                 | 193                     | 1,203                    | 1,719                  | 3,467                 |
| Chromosome set 7        | 169                     | 964                      | 1,207                  | 1,467                 | 245                     | 749                      | 1,216                  | 1,918                 |
| Allele-identified genes | 2,978                   | 11,198                   | 11,680                 | 16,652                | 1,903                   | 8,920                    | 13,160                 | 24,058                |

**Supplementary Table 7. Annotation results of protein-coding genes and BUSCO assessments.** A total of 1,614 conserved embryophyta proteins (CEPs) were used in BUSCO assessments. CDS: coding sequence.

|                       |                            | <i>H. hainanensis</i> | <i>H. reticulata</i> | <i>H. chinensis</i> | <i>P. chinensis</i> | <i>S. robusta</i> | <i>D. turbinatus</i> | <i>V. mangachapoi</i> |
|-----------------------|----------------------------|-----------------------|----------------------|---------------------|---------------------|-------------------|----------------------|-----------------------|
| Gene structure        | Gene number                | 88,703                | 85,031               | 29,372              | 29,651              | 29,104            | 31,744               | 31,006                |
|                       | Average gene length (bp)   | 2,690                 | 2,781                | 2,773               | 2,872               | 2,974             | 2,824                | 2,910                 |
|                       | Average CDS length (bp)    | 1,127                 | 1,171                | 1,132               | 1,163               | 1,184             | 1,181                | 1,163                 |
|                       | Average exons per gene     | 5.1                   | 5.3                  | 5.2                 | 5.3                 | 5.4               | 5.2                  | 5.2                   |
|                       | Average exon length (bp)   | 221                   | 220                  | 217                 | 219                 | 220               | 229                  | 226                   |
|                       | Average intron length (bp) | 382                   | 373                  | 389                 | 397                 | 409               | 395                  | 421                   |
|                       | BUSCO assessment           | Complete CEPs         | 1,512 (93.7%)        | 1,513 (93.7%)       | 1,515 (93.9%)       | 1,483 (91.9%)     | 1,500 (92.9%)        | 1,513 (93.7%)         |
|                       | Single-copy CEPs           | 175 (10.9%)           | 162 (10.0%)          | 1,306 (80.9%)       | 1,293 (80.1%)       | 1,330 (82.4%)     | 1,286 (79.7%)        | 1,306 (80.9%)         |
|                       | Duplicated CEPs            | 1,337 (82.8%)         | 1,351 (83.7%)        | 209 (13.0%)         | 190 (11.8%)         | 170 (10.5%)       | 227 (14.0%)          | 167 (10.4%)           |
|                       | Fragmented CEPs            | 39 (2.4%)             | 34 (2.1%)            | 45 (2.8%)           | 54 (3.3%)           | 47 (2.9%)         | 34 (2.1%)            | 75 (4.6%)             |
|                       | Missing CEPs               | 63 (3.9%)             | 67 (4.2%)            | 54 (3.3%)           | 77 (4.8%)           | 67 (4.2%)         | 67 (4.2%)            | 66 (4.1%)             |
| Functional annotation | Swiss-Prot                 | 70,086 (79.0%)        | 69,960 (82.3%)       | 23,213 (79.0%)      | 23,148 (78.1%)      | 22,747 (78.2%)    | 24,173 (76.2%)       | 23,833 (76.9%)        |
|                       | NR                         | 85,925 (97.9%)        | 84,422 (99.3%)       | 28,391 (96.7%)      | 28,427 (95.9%)      | 27,821 (95.6%)    | 30,641 (96.5%)       | 29,436 (94.9%)        |
|                       | KEGG                       | 65,391 (73.7%)        | 65,126 (76.6%)       | 21,789 (74.2%)      | 21,638 (73.0%)      | 21,295 (73.2%)    | 22,092 (69.6%)       | 22,475 (72.5%)        |
|                       | GO                         | 80,762 (91.0%)        | 77,970 (91.7%)       | 26,742 (91.1%)      | 27,022 (91.1%)      | 26,564 (91.3%)    | 28,531 (89.9%)       | 28,206 (91.0%)        |
|                       | Pfam                       | 68,287 (77.0%)        | 68,799 (80.9%)       | 22,664 (77.2%)      | 22,728 (76.7%)      | 22,455 (77.2%)    | 23,370 (73.6%)       | 23,451 (75.6%)        |
|                       | Overall                    |                       | 88,341 (99.6%)       | 84,932 (99.9%)      | 29,234 (99.5%)      | 29,498 (99.5%)    | 28,950 (99.5%)       | 31,604 (99.6%)        |

**Supplementary Table 8. Annotation results of repeat sequences (using Tandem Repeats Finder (TRF), RepeatMasker and RepeatProteinMask) and non-coding RNAs. LTR-RT: long terminal repeat retrotransposon.**

| Species               | Repeat sequences  |                    |              | Non-coding RNA |        |                     |                   |             |
|-----------------------|-------------------|--------------------|--------------|----------------|--------|---------------------|-------------------|-------------|
|                       | Type              | Size (bp)          | % of genome  | Type           | Number | Average length (bp) | Total length (bp) | % of genome |
| <i>H. hainanensis</i> | TRF               | 43,630,344         | 3.97         | miRNA          | 786    | 120.48              | 94,696            | 0.0086      |
|                       | RepeatMasker      | 524,298,168        | 47.70        | tRNA           | 1,857  | 74.94               | 139,162           | 0.0127      |
|                       | RepeatProteinMask | 81,936,177         | 7.45         | rRNA           | 300    | 196.98              | 59,093            | 0.0054      |
|                       | <b>Total</b>      | <b>542,963,148</b> | <b>49.39</b> | snRNA          | 1,526  | 107.82              | 164,529           | 0.0150      |
|                       | LTR-RT            | 345,420,890        | 31.42        |                |        |                     |                   |             |
| <i>H. reticulata</i>  | TRF               | 50,220,382         | 4.06         | miRNA          | 1,149  | 115.33              | 132,512           | 0.0107      |
|                       | RepeatMasker      | 560,712,793        | 45.29        | tRNA           | 2,213  | 75.10               | 166,187           | 0.0134      |
|                       | RepeatProteinMask | 107,112,585        | 8.65         | rRNA           | 550    | 236.08              | 129,845           | 0.0105      |
|                       | <b>Total</b>      | <b>587,772,479</b> | <b>47.48</b> | snRNA          | 1,772  | 110.15              | 195,182           | 0.0158      |
|                       | LTR-RT            | 401,299,478        | 32.42        |                |        |                     |                   |             |
| <i>H. chinensis</i>   | TRF               | 12,880,263         | 3.79         | miRNA          | 381    | 121.51              | 46,296            | 0.0136      |
|                       | RepeatMasker      | 143,083,785        | 42.15        | tRNA           | 655    | 74.99               | 49,118            | 0.0145      |
|                       | RepeatProteinMask | 30,960,981         | 9.12         | rRNA           | 336    | 240.52              | 80,814            | 0.0238      |
|                       | <b>Total</b>      | <b>150,108,579</b> | <b>44.22</b> | snRNA          | 528    | 108.33              | 57,198            | 0.0169      |
|                       | LTR-RT            | 90,401,075         | 26.63        |                |        |                     |                   |             |
| <i>P. chinensis</i>   | TRF               | 10,767,710         | 3.43         | miRNA          | 338    | 115.04              | 38,882            | 0.0124      |
|                       | RepeatMasker      | 132,085,261        | 42.08        | tRNA           | 623    | 75.25               | 46,880            | 0.0149      |
|                       | RepeatProteinMask | 20,963,852         | 6.68         | rRNA           | 125    | 380.54              | 47,567            | 0.0152      |
|                       | <b>Total</b>      | <b>136,971,552</b> | <b>43.64</b> | snRNA          | 471    | 109.80              | 51,715            | 0.0165      |
|                       | LTR-RT            | 62,301,462         | 19.85        |                |        |                     |                   |             |
| <i>S. robusta</i>     | TRF               | 11,405,760         | 3.49         | miRNA          | 419    | 119.87              | 50,227            | 0.0153      |
|                       | RepeatMasker      | 143,206,917        | 43.76        | tRNA           | 631    | 75.36               | 47,551            | 0.0145      |
|                       | RepeatProteinMask | 25,266,318         | 7.72         | rRNA           | 136    | 187.62              | 25,517            | 0.0078      |



|                       |                   |                    |              |       |       |        |           |        |
|-----------------------|-------------------|--------------------|--------------|-------|-------|--------|-----------|--------|
|                       | <b>Total</b>      | <b>148,596,107</b> | <b>45.40</b> | snRNA | 427   | 107.40 | 45,858    | 0.0140 |
|                       | LTR-RT            | 79,262,279         | 24.22        |       |       |        |           |        |
| <i>D. turbinatus</i>  | TRF               | 15,795,432         | 4.08         | miRNA | 1,052 | 141.58 | 148,939   | 0.0385 |
|                       | RepeatMasker      | 188,535,626        | 48.69        | tRNA  | 2,187 | 75.52  | 165,168   | 0.0427 |
|                       | RepeatProteinMask | 27,975,591         | 7.22         | rRNA  | 7,057 | 400.77 | 2,828,206 | 0.7300 |
|                       | <b>Total</b>      | <b>195,643,900</b> | <b>50.53</b> | snRNA | 660   | 112.92 | 74,529    | 0.0192 |
|                       | LTR-RT            | 108,354,887        | 27.98        |       |       |        |           |        |
| <i>V. mangachapoi</i> | TRF               | 23,606,357         | 5.27         | miRNA | 445   | 114.46 | 50,936    | 0.0114 |
|                       | RepeatMasker      | 216,261,711        | 48.29        | tRNA  | 583   | 75.10  | 43,783    | 0.0098 |
|                       | RepeatProteinMask | 57,223,275         | 12.78        | rRNA  | 3,447 | 175.89 | 606,284   | 0.1400 |
|                       | <b>Total</b>      | <b>230,664,898</b> | <b>51.51</b> | snRNA | 460   | 115.99 | 53,357    | 0.0119 |
|                       | LTR-RT            | 178,277,869        | 39.81        |       |       |        |           |        |

**Supplementary Table 9. Results of gene family clustering by comparing genomes of our focal species with those of additional 12 Dipterocarpoideae species and other six species, five temperate tree species.**

| Species                                        | Gene number | Genes in families | Family number | Unique families | Reference  |
|------------------------------------------------|-------------|-------------------|---------------|-----------------|------------|
| <i>Dipterocarpus alatus</i>                    | 29,203      | 37,119            | 24,002        | 215             | 13         |
| <i>Dipterocarpus gracilis</i>                  | 27,310      | 34,063            | 23,009        | 106             | 13         |
| <i>Dipterocarpus intricatus</i>                | 26,797      | 33,843            | 22,753        | 86              | 13         |
| <i>Dipterocarpus turbinatus</i>                | 42,423      | 29,587            | 18,183        | 45              | This study |
| <i>Dipterocarpus zeylanicus</i>                | 38,375      | 33,869            | 23,062        | 93              | 13         |
| <i>Gossypium raimondii</i>                     | 37,824      | 30,040            | 14,976        | 371             | 14         |
| <i>Hopea chinensis</i>                         | 31,744      | 26,501            | 17,976        | 23              | This study |
| <i>Hopea reticulata</i>                        | 37,356      | 41,351            | 18,619        | 432             | This study |
| <i>Hopea hainanensis</i>                       | 33,724      | 35,651            | 19,643        | 342             | This study |
| <i>Hopea mollissima</i>                        | 29,296      | 31,750            | 21,327        | 129             | 13         |
| <i>Hopea odorata</i>                           | 48,040      | 36,665            | 21,647        | 417             | 13         |
| <i>Parashorea chinensis</i>                    | 42,508      | 26,348            | 17,757        | 60              | This study |
| <i>Shorea henryana</i>                         | 35,939      | 29,946            | 20,042        | 89              | 13         |
| <i>Shorea leprosula</i>                        | 44,078      | 30,259            | 19,965        | 188             | 5          |
| <i>Shorea robusta</i>                          | 35,359      | 26,475            | 18,046        | 51              | This study |
| <i>Shorea roxburghii</i>                       | 29,650      | 30,441            | 20,048        | 99              | 13         |
| <i>Theobroma cacao</i>                         | 33,950      | 20,170            | 14,531        | 119             | 15         |
| <i>Vatica mangachapoi</i>                      | 34,469      | 27,774            | 18,593        | 54              | This study |
| <i>Vatica odorata</i>                          | 29,104      | 32,945            | 21,821        | 179             | 13         |
| <i>Vatica rassak</i>                           | 34,473      | 32,266            | 21,637        | 276             | 13         |
| <i>Vatica xishuangbannaensis</i>               | 21,109      | 31,889            | 21,692        | 103             | 13         |
| <i>Oryza sativa</i>                            | 31,006      | 23,717            | 12,779        | 1,818           | 16         |
| <i>Arabidopsis thaliana</i>                    | 39,825      | 23,561            | 13,131        | 801             | 17         |
| <i>Aquilaria sinensis</i>                      | 39,603      | 22,261            | 13,899        | 799             | 18         |
| <i>Amborella trichopoda</i>                    | 36,861      | 19,088            | 12,084        | 1,034           | 19         |
| <b>Clustered with 5 temperate tree species</b> |             |                   |               |                 |            |
| <i>Betula pendula</i>                          | 24,629      | 19,530            | 13,776        | 395             | 9          |
| <i>Dipterocarpus turbinatus</i>                | 31,744      | 27,801            | 16,529        | 143             | This study |
| <i>Fraxinus excelsior</i>                      | 38,948      | 31,146            | 14,180        | 974             | 20         |
| <i>Fagus sylvatica</i>                         | 61,548      | 55,954            | 16,355        | 2,168           | 21         |
| <i>Hopea chinensis</i>                         | 29,296      | 25,584            | 17,351        | 54              | This study |
| <i>Hopea exalata</i>                           | 48,040      | 40,630            | 18,170        | 611             | This study |
| <i>Hopea hainanensis</i>                       | 42,508      | 34,501            | 18,765        | 484             | This study |
| <i>Ostrya rehderiana</i>                       | 27,767      | 22,146            | 15,060        | 700             | 6          |
| <i>Parashorea chinensis</i>                    | 29,650      | 25,634            | 17,191        | 87              | This study |
| <i>Quercus robur</i>                           | 25,808      | 21,616            | 12,218        | 585             | 22         |
| <i>Shorea robusta</i>                          | 29,104      | 25,378            | 17,148        | 83              | This study |
| <i>Vatica mangachapoi</i>                      | 31,006      | 25,745            | 16,651        | 205             | This study |





**Supplementary Table 11. KEGG categories for the positively selected genes detected in the genomes of our focal species compared with those of the five temperate tree species.**

| KEGG ID  | Map title                                           | N genes | KEGG ID  | Map title                                           | N genes |
|----------|-----------------------------------------------------|---------|----------|-----------------------------------------------------|---------|
| map03440 | Homologous recombination                            | 2       | map00565 | Ether lipid metabolism                              | 1       |
| map00053 | Ascorbate and aldarate metabolism                   | 2       | map00220 | Arginine biosynthesis                               | 1       |
| map00740 | Riboflavin metabolism                               | 1       | map00073 | Cutin, suberine and wax biosynthesis                | 1       |
| map00232 | Caffeine metabolism                                 | 1       | map00400 | Phenylalanine, tyrosine and tryptophan biosynthesis | 1       |
| map03018 | RNA degradation                                     | 3       | map00195 | Photosynthesis                                      | 1       |
| map00902 | Monoterpenoid biosynthesis                          | 1       | map00010 | Glycolysis / Gluconeogenesis                        | 2       |
| map00920 | Sulfur metabolism                                   | 1       | map00350 | Tyrosine metabolism                                 | 1       |
| map00071 | Fatty acid degradation                              | 1       | map00240 | Pyrimidine metabolism                               | 2       |
| map00900 | Terpenoid backbone biosynthesis                     | 1       | map00360 | Phenylalanine metabolism                            | 1       |
| map03030 | DNA replication                                     | 1       | map03050 | Proteasome                                          | 1       |
| map00860 | Porphyrin and chlorophyll metabolism                | 1       | map02010 | ABC transporters                                    | 1       |
| map04141 | Protein processing in endoplasmic reticulum         | 3       | map01212 | Fatty acid metabolism                               | 1       |
| map03015 | mRNA surveillance pathway                           | 2       | map01210 | 2-Oxocarboxylic acid metabolism                     | 1       |
| map00230 | Purine metabolism                                   | 2       | map00630 | Glyoxylate and dicarboxylate metabolism             | 1       |
| map03420 | Nucleotide excision repair                          | 1       | map00260 | Glycine, serine and threonine metabolism            | 1       |
| map00760 | Nicotinate and nicotinamide metabolism              | 1       | map01230 | Biosynthesis of amino acids                         | 3       |
| map00480 | Glutathione metabolism                              | 1       | map00030 | Pentose phosphate pathway                           | 1       |
| map00130 | Ubiquinone and other terpenoid-quinone biosynthesis | 2       | map04146 | Peroxisome                                          | 1       |
| map00564 | Glycerophospholipid metabolism                      | 3       | map00052 | Galactose metabolism                                | 1       |
| map00730 | Thiamine metabolism                                 | 1       | map03008 | Ribosome biogenesis in eukaryotes                   | 1       |
| map00650 | Butanoate metabolism                                | 1       | map03040 | Spliceosome                                         | 2       |
| map00062 | Fatty acid elongation                               | 1       | map00500 | Starch and sucrose metabolism                       | 3       |

**Supplementary Table 12. Genes for *in vitro* functional assays from the genome of *H. chinensis* with substrates and expected reaction products.**

| Gene ID              | Gene name                                        | Substrate(s)                                           | Expected product(s)                                   |
|----------------------|--------------------------------------------------|--------------------------------------------------------|-------------------------------------------------------|
| evm.model.000015F.76 | UDP-sugar<br>pyrophosphorylase<br>( <i>USP</i> ) | Glucose 1-<br>phosphate, uridine<br>triphosphate (UTP) | Diphosphate, (uridine<br>diphosphate) UDP-<br>glucose |
| evm.model.000011F.38 | Pyridoxine 4-<br>dehydrogenase ( <i>PLR1</i> )   | NADPH, pyridoxal                                       | Pyridoxine, NADPH+                                    |

**Supplementary Table 13. KEGG categories for the contracted gene families detected in the genomes of our focal species compared with those of the five temperate tree species.**

| KEGG ID  | Map title                                              | N gene families |
|----------|--------------------------------------------------------|-----------------|
| map04626 | Plant-pathogen interaction                             | 5               |
| map00903 | Limonene and pinene degradation                        | 1               |
| map00909 | Sesquiterpenoid and triterpenoid biosynthesis          | 1               |
| map00730 | Thiamine metabolism                                    | 1               |
| map04122 | Sulfur relay system                                    | 1               |
| map00945 | Stilbenoid, diarylheptanoid and gingerol biosynthesis  | 1               |
| map00460 | Cyanoamino acid metabolism                             | 2               |
| map00966 | Glucosinolate biosynthesis                             | 1               |
| map00950 | Isoquinoline alkaloid biosynthesis                     | 2               |
| map00960 | Tropane, piperidine and pyridine alkaloid biosynthesis | 2               |
| map00360 | Phenylalanine metabolism                               | 2               |
| map00350 | Tyrosine metabolism                                    | 1               |
| map00410 | beta-Alanine metabolism                                | 2               |
| map00260 | Glycine, serine and threonine metabolism               | 2               |
| map00380 | Tryptophan metabolism                                  | 1               |
| map01210 | 2-Oxocarboxylic acid metabolism                        | 1               |
| map00940 | Phenylpropanoid biosynthesis                           | 2               |
| map00040 | Pentose and glucuronate interconversions               | 1               |



**Supplementary Table 14. The significantly expanded/contracted gene families in the genomes of our focal species compared with those of five temperate tree species. NA: not available.**

| Gene family ID                             | Encoded protein                                                   | KEGG pathway/GO term                | Functional category | Reference |
|--------------------------------------------|-------------------------------------------------------------------|-------------------------------------|---------------------|-----------|
| 30 (expanded)                              | Disease resistance proteins                                       | GO:0006952 Defense response         | Plant immunity      | NA        |
| 29, 39, 65, 74, 245, 246, 257 (contracted) | Leucine-rich repeat receptor-like kinases (LRR-RLKs)              | map04626 Plant-pathogen interaction | Plant immunity      | 23        |
| 22, 68 (contracted)                        | CC-NBS-LRR (NBS-LRR: nucleotide binding site-leucine rich repeat) | map04626 Plant-pathogen interaction | Plant immunity      | 24        |
| 5 (contracted)                             | TIR-NBS-LRR                                                       | map04627 Plant-pathogen interaction | Plant immunity      | 24        |

**Supplementary Table 15. Expanded and contracted gene families related to plant immunity in the genomes of our focal Dipterocarpoideae species compared with those of the five temperate tree species.** Abbreviations of annotated function of gene families are shown in Supplementary Table 14.

| Family ID                       | <i>H. chinensis</i> | <i>P. chinensis</i> | <i>S. robusta</i> | <i>D. turbinatus</i> | <i>V. mangachapoi</i> | <i>B. pendula</i> | <i>F. excelsior</i> | <i>F. sylvatica</i> | <i>O. rehderiana</i> | <i>Q. robur</i> | Encoded protein             |
|---------------------------------|---------------------|---------------------|-------------------|----------------------|-----------------------|-------------------|---------------------|---------------------|----------------------|-----------------|-----------------------------|
| <b>Expanded gene families</b>   |                     |                     |                   |                      |                       |                   |                     |                     |                      |                 |                             |
| 30                              | 0                   | 13                  | 3                 | 256                  | 73                    | 0                 | 0                   | 0                   | 0                    | 0               | Disease resistance proteins |
| <b>Contracted gene families</b> |                     |                     |                   |                      |                       |                   |                     |                     |                      |                 |                             |
| 29                              | 7                   | 4                   | 9                 | 5                    | 11                    | 30                | 52                  | 89                  | 26                   | 114             | LRR-RLK-1                   |
| 39                              | 3                   | 2                   | 3                 | 2                    | 6                     | 2                 | 11                  | 102                 | 0                    | 128             | LRR-RLK-2                   |
| 65                              | 3                   | 2                   | 1                 | 4                    | 10                    | 0                 | 12                  | 56                  | 4                    | 97              | LRR-RLK-3                   |
| 74                              | 6                   | 3                   | 2                 | 3                    | 6                     | 29                | 18                  | 42                  | 16                   | 44              | LRR-RLK-4                   |
| 245                             | 3                   | 2                   | 1                 | 1                    | 3                     | 15                | 7                   | 26                  | 1                    | 6               | LRR-RLK-5                   |
| 246                             | 3                   | 0                   | 2                 | 3                    | 0                     | 27                | 5                   | 19                  | 0                    | 6               | LRR-RLK-6                   |
| 257                             | 1                   | 0                   | 2                 | 2                    | 5                     | 13                | 7                   | 9                   | 0                    | 25              | LRR-RLK-7                   |
| 22                              | 6                   | 2                   | 1                 | 2                    | 16                    | 2                 | 23                  | 149                 | 12                   | 193             | CC-NBS-LRR-1                |
| 68                              | 1                   | 2                   | 0                 | 2                    | 0                     | 11                | 9                   | 54                  | 25                   | 73              | CC-NBS-LRR-2                |
| 5                               | 0                   | 1                   | 1                 | 1                    | 1                     | 73                | 10                  | 158                 | 4                    | 361             | TIR-NBS-LRR-1               |

**Supplementary Table 16. Statistics of re-sequencing data (using Illumina NovaSeq 6000 platform) for *H. hainanensis* and *H. reticulata*.**

| Species               | Sample | Sampling site | Total data (Gb) | The longest monoploid genome (LMG) |                   | The longest two monoploid genomes |                   |
|-----------------------|--------|---------------|-----------------|------------------------------------|-------------------|-----------------------------------|-------------------|
|                       |        |               |                 | Mapping rate (%)                   | Average depth (X) | Mapping rate (%)                  | Average depth (X) |
| <i>H. hainanensis</i> | BW1    | Bawangling    | 25.00           | 85.95                              | 55.57             | 94.60                             | 33.28             |
|                       | BW2    | Bawangling    | 27.02           | 87.10                              | 60.81             | 95.79                             | 36.19             |
|                       | BW3    | Bawangling    | 29.31           | 84.13                              | 61.82             | 92.64                             | 36.86             |
|                       | BW4    | Bawangling    | 26.79           | 86.10                              | 58.90             | 94.51                             | 34.93             |
|                       | BW5    | Bawangling    | 26.28           | 76.57                              | 49.62             | 84.49                             | 29.76             |
|                       | BW6    | Bawangling    | 30.58           | 60.06                              | 47.29             | 66.16                             | 28.23             |
|                       | BW7    | Bawangling    | 24.61           | 73.76                              | 45.23             | 81.40                             | 27.09             |
|                       | BW8    | Bawangling    | 21.28           | 79.04                              | 44.54             | 86.78                             | 26.41             |
|                       | BW9    | Bawangling    | 24.21           | 84.91                              | 54.15             | 93.36                             | 32.17             |
|                       | BW10   | Bawangling    | 26.34           | 81.40                              | 54.34             | 89.87                             | 32.50             |
|                       | BW11   | Bawangling    | 25.30           | 71.53                              | 47.34             | 78.71                             | 28.29             |
|                       | BW12   | Bawangling    | 36.09           | 63.08                              | 59.62             | 69.28                             | 36.75             |
|                       | BW13   | Bawangling    | 25.70           | 66.40                              | 44.45             | 73.04                             | 26.71             |
|                       | BW14   | Bawangling    | 36.06           | 81.14                              | 75.24             | 89.02                             | 46.30             |
|                       | BW15   | Bawangling    | 27.22           | 85.75                              | 59.35             | 92.82                             | 34.70             |
|                       | BW16   | Bawangling    | 36.76           | 87.14                              | 79.51             | 95.68                             | 47.30             |
|                       | BW17   | Bawangling    | 27.22           | 84.14                              | 58.40             | 94.32                             | 37.24             |
|                       | BW18   | Bawangling    | 22.85           | 84.25                              | 48.11             | 92.70                             | 29.09             |
|                       | BW19   | Bawangling    | 29.27           | 84.90                              | 64.70             | 93.44                             | 38.34             |
|                       | BW20   | Bawangling    | 25.91           | 84.34                              | 55.44             | 92.68                             | 33.62             |
|                       | BW21   | Bawangling    | 27.79           | 79.03                              | 55.90             | 86.87                             | 33.28             |
|                       | BW22   | Bawangling    | 26.37           | 85.71                              | 57.78             | 94.23                             | 34.41             |
|                       | BW23   | Bawangling    | 22.80           | 85.57                              | 50.94             | 93.82                             | 30.20             |



|                      |      |               |       |       |       |       |       |
|----------------------|------|---------------|-------|-------|-------|-------|-------|
|                      | DZ1  | Danzhou       | 26.71 | 85.31 | 58.42 | 93.65 | 34.68 |
|                      | JF1  | Jianfengling  | 26.25 | 86.31 | 56.46 | 94.74 | 35.05 |
|                      | JF2  | Jianfengling  | 29.80 | 68.13 | 52.58 | 74.79 | 32.57 |
|                      | JF3  | Jianfengling  | 30.61 | 85.05 | 64.52 | 93.64 | 39.72 |
|                      | JF4  | Jiangfengling | 33.99 | 60.47 | 53.32 | 66.40 | 33.02 |
|                      | JF5  | Jianfengling  | 26.73 | 76.68 | 52.78 | 84.53 | 31.42 |
|                      | WZ1  | Wuzhi         | 25.35 | 63.56 | 41.86 | 69.87 | 25.05 |
| <i>H. reticulata</i> | GS1  | Ganshiling    | 27.19 | 0.81  | 47.95 | 89.81 | 30.36 |
|                      | GS2  | Ganshiling    | 43.68 | 0.82  | 80.63 | 90.81 | 50.61 |
|                      | GS3  | Ganshiling    | 38.15 | 0.83  | 66.90 | 91.66 | 41.99 |
|                      | GS4  | Ganshiling    | 33.22 | 0.78  | 56.43 | 85.81 | 35.70 |
|                      | GS5  | Ganshiling    | 28.25 | 0.73  | 45.49 | 80.72 | 28.79 |
|                      | GS6  | Ganshiling    | 26.84 | 0.84  | 49.34 | 93.25 | 31.24 |
|                      | GS7  | Ganshiling    | 35.30 | 0.83  | 62.42 | 92.14 | 39.39 |
|                      | GS8  | Ganshiling    | 30.05 | 0.85  | 55.68 | 93.40 | 35.13 |
|                      | GS9  | Ganshiling    | 31.42 | 0.83  | 55.94 | 91.27 | 35.35 |
|                      | GS10 | Ganshiling    | 30.09 | 0.84  | 54.71 | 92.39 | 34.49 |
|                      | GS11 | Ganshiling    | 28.64 | 0.84  | 51.09 | 92.55 | 32.40 |
|                      | GS12 | Ganshiling    | 26.96 | 0.84  | 49.77 | 92.68 | 31.49 |
|                      | GS13 | Ganshiling    | 29.85 | 0.82  | 53.06 | 90.98 | 33.52 |
|                      | GS14 | Ganshiling    | 27.72 | 0.80  | 48.44 | 87.96 | 30.94 |
|                      | GS15 | Ganshiling    | 29.33 | 0.80  | 50.09 | 88.73 | 31.54 |
|                      | GS16 | Ganshiling    | 30.27 | 0.84  | 55.23 | 92.84 | 35.05 |
|                      | GS17 | Ganshiling    | 26.92 | 0.80  | 46.91 | 88.56 | 29.79 |
|                      | GS18 | Ganshiling    | 31.38 | 0.83  | 55.45 | 91.93 | 35.12 |
|                      | GS19 | Ganshiling    | 26.47 | 0.82  | 47.31 | 90.96 | 30.05 |
|                      | GS20 | Ganshiling    | 28.18 | 0.73  | 44.93 | 81.05 | 28.72 |

|      |            |       |      |       |       |       |
|------|------------|-------|------|-------|-------|-------|
| GS21 | Ganshiling | 44.62 | 0.82 | 77.39 | 90.66 | 48.58 |
| GS22 | Ganshiling | 36.48 | 0.76 | 58.45 | 84.21 | 36.91 |
| GS23 | Ganshiling | 25.22 | 0.79 | 44.50 | 87.57 | 28.32 |
| GS24 | Ganshiling | 26.04 | 0.81 | 45.80 | 89.36 | 29.20 |
| GS25 | Ganshiling | 27.35 | 0.78 | 44.52 | 85.90 | 28.50 |
| GS26 | Ganshiling | 25.55 | 0.77 | 44.09 | 85.57 | 28.07 |
| GS27 | Ganshiling | 26.06 | 0.66 | 37.87 | 73.10 | 24.34 |
| GS28 | Ganshiling | 28.91 | 0.84 | 52.65 | 92.91 | 33.36 |
| GS29 | Ganshiling | 29.15 | 0.80 | 50.70 | 88.88 | 32.23 |
| GS30 | Ganshiling | 25.65 | 0.84 | 46.43 | 92.56 | 29.45 |
| GS31 | Ganshiling | 26.03 | 0.80 | 45.47 | 88.65 | 28.84 |
| GS32 | Ganshiling | 27.82 | 0.69 | 42.22 | 76.14 | 26.95 |

---

**Supplementary Table 17. Categories of SNPs based on genome annotation.** Upstream: SNP located within the 1Kb upstream region of a gene. Exonic: SNP located in an exon. Synonymous: SNP that did not caused change of encoded amino acid. Stop gain: SNP that caused encoded amino acid to become a stop codon. Stop loss: SNP that caused loss of a stop codon. Start loss: SNP that caused loss of a start codon. Non-synonymous: SNP that caused change of encoded amino acid. Intronic: SNP located in an intron. Splicing: SNP located in an alternative splicing site. Downstream: SNP located within the 1Kb downstream region of a gene. Upstream/Downstream: SNP that located within the 1Kb upstream region of a gene, at the same time, located within the 1Kb downstream region of another gene. Intergenic: SNP located in an intergenic region. Total: total number of SNPs.

| Category                                 |                | Number of SNPs in<br><i>H. hainanensis</i> | Number of SNPs in<br><i>H. reticulata</i> |
|------------------------------------------|----------------|--------------------------------------------|-------------------------------------------|
| <b>The longest monoploid genome</b>      |                |                                            |                                           |
| Upstream                                 |                | 207,657                                    | 299,880                                   |
| Exonic                                   | Stop gain      | 1,672                                      | 2,346                                     |
| Exonic                                   | Stop loss      | 351                                        | 361                                       |
| Exonic                                   | Start loss     | 272                                        | 332                                       |
| Exonic                                   | Non-synonymous | 109,666                                    | 168,449                                   |
| Intronic                                 |                | 362,658                                    | 563,231                                   |
| Splicing                                 |                | 838                                        | 1,372                                     |
| Downstream                               |                | 186,002                                    | 274,106                                   |
| Upstream/Downstream                      |                | 22,165                                     | 27,259                                    |
| Intergenic                               |                | 1,942,417                                  | 2,995,481                                 |
| Total                                    |                | 2,922,653                                  | 4,477,756                                 |
| <b>The longest two monoploid genomes</b> |                |                                            |                                           |
|                                          | Upstream       | 102,324                                    | 179,170                                   |
| Exonic                                   | Stop gain      | 959                                        | 1,601                                     |
| Exonic                                   | Stop loss      | 198                                        | 235                                       |
| Exonic                                   | Synonymous     | 48,434                                     | 89,220                                    |
| Exonic                                   | Non-synonymous | 60,174                                     | 107,962                                   |
| Intronic                                 |                | 214,885                                    | 369,200                                   |
| Splicing                                 |                | 518                                        | 944                                       |
| Downstream                               |                | 92,121                                     | 166,974                                   |
| upstream/downstream                      |                | 15,342                                     | 17,970                                    |
| Intergenic                               |                | 1,006,070                                  | 2,076,211                                 |
| Total                                    |                | 1,582,562                                  | 3,028,610                                 |



**Supplementary Table 18. Estimation of mutation rate for the genomes of *H. hainanensis* and *H. reticulata*.**

|                                    | <i>H. hainanensis</i> vs.<br><i>H. reticulata</i>             | <i>H. hainanensis</i> vs.<br><i>H. chinensis</i> | <i>H. reticulata</i> vs.<br><i>H. chinensis</i> |
|------------------------------------|---------------------------------------------------------------|--------------------------------------------------|-------------------------------------------------|
| All fourfold degenerate sites      | 562034                                                        | 920297                                           | 710925                                          |
| Diverged fourfold degenerate sites | 21841                                                         | 33788                                            | 17475                                           |
| Mutation rate (/site/generation)   | 1.06 × 10 <sup>-8</sup> (generation time setting as 15 years) |                                                  |                                                 |
|                                    | 1.41 × 10 <sup>-8</sup> (generation time setting as 20 years) |                                                  |                                                 |
|                                    | 2.11 × 10 <sup>-8</sup> (generation time setting as 30 years) |                                                  |                                                 |

**Supplementary Table 19. Results of KEGG enrichment analysis for the 647 (in *H. hainanensis*) and 581 genes (in *H. reticulata*) with derived deleterious mutations (DDMs) and for the 407 (in *H. hainanensis*) and 300 genes (in *H. reticulata*) with derived major-effect mutations (DMEMs). Fisher's Chi-Square test was used to identify pathways with significant enrichment results. We only present the pathways with significant results in KEGG enrichment analysis.**

| Genes with DDMs              |                                   |             |                | Genes with DMEMs |                                   |             |                |
|------------------------------|-----------------------------------|-------------|----------------|------------------|-----------------------------------|-------------|----------------|
| KEGG pathway                 | Description                       | Gene number | <i>P</i> value | KEGG pathway     | Description                       | Gene number | <i>P</i> value |
| <b><i>H. hainanensis</i></b> |                                   |             |                |                  |                                   |             |                |
| map00592                     | alpha-Linolenic acid metabolism   | 8           | 0.0035         | map04145         | Phagosome                         | 6           | 0.0297         |
| map00944                     | Flavone and flavonol biosynthesis | 3           | 0.0097         | map03410         | Base excision repair              | 4           | 0.0397         |
| map00020                     | Citrate cycle (TCA cycle)         | 6           | 0.0322         | map00730         | Thiamine metabolism               | 2           | 0.0484         |
| map00591                     | Linoleic acid metabolism          | 3           | 0.0365         |                  |                                   |             |                |
| map00051                     | Fructose and mannose metabolism   | 9           | 0.0457         |                  |                                   |             |                |
| map00564                     | Glycerophospholipid metabolism    | 12          | 0.0484         |                  |                                   |             |                |
| <b><i>H. reticulata</i></b>  |                                   |             |                |                  |                                   |             |                |
| map01502                     | Vancomycin resistance             | 2           | 0.0015         | map00944         | Flavone and flavonol biosynthesis | 2           | 0.0078         |
| map00052                     | Galactose metabolism              | 10          | 0.0047         | map03008         | Ribosome biogenesis in eukaryotes | 6           | 0.0203         |
| map00970                     | Aminoacyl-tRNA biosynthesis       | 10          | 0.0063         | map01502         | Vancomycin resistance             | 1           | 0.0335         |
| map01210                     | 2-Oxocarboxylic acid metabolism   | 7           | 0.0196         | map00052         | Galactose metabolism              | 5           | 0.0419         |
| map00053                     | Ascorbate and aldarate metabolism | 5           | 0.0242         |                  |                                   |             |                |
| map00565                     | Ether lipid metabolism            | 4           | 0.0350         |                  |                                   |             |                |

**Supplementary Table 20. Results of KEGG enrichment analysis for the 195 (in *H. hainanensis*) and 195 genes (in *H. reticulata*) with the DDMs that were homozygous in at least one sampled tree and for the 175 (in *H. hainanensis*) and 150 genes (in *H. reticulata*) with DMEMs that were homozygous in at least one sampled tree. Fisher's Chi-Square test was used to identify pathways with significant enrichment results. We only present the pathways with significant results in KEGG enrichment analysis.**

| Genes with homozygous DDMs   |                                 |             |                | Genes with homozygous DMEMs |                                                        |             |                |
|------------------------------|---------------------------------|-------------|----------------|-----------------------------|--------------------------------------------------------|-------------|----------------|
| KEGG pathway                 | Description                     | Gene number | <i>P</i> value | KEGG pathway                | Description                                            | Gene number | <i>P</i> value |
| <b><i>H. hainanensis</i></b> |                                 |             |                |                             |                                                        |             |                |
| map00500                     | Starch and sucrose metabolism   | 11          | 0.0044         | map00950                    | Isoquinoline alkaloid biosynthesis                     | 2           | 0.0307         |
| map00591                     | Linoleic acid metabolism        | 2           | 0.0181         | map00960                    | Tropane, piperidine and pyridine alkaloid biosynthesis | 2           | 0.0370         |
| map00592                     | alpha-Linolenic acid metabolism | 3           | 0.0332         | map00260                    | Glycine, serine and threonine metabolism               | 3           | 0.0395         |
| map00940                     | Phenylpropanoid biosynthesis    | 5           | 0.0374         | map00565                    | Ether lipid metabolism                                 | 2           | 0.0464         |
|                              |                                 |             |                | map00562                    | Inositol phosphate metabolism                          | 3           | 0.0476         |
| <b><i>H. reticulata</i></b>  |                                 |             |                |                             |                                                        |             |                |
| map00052                     | Galactose metabolism            | 6           | 0.0012         | map00944                    | Flavone and flavonol biosynthesis                      | 2           | 0.0019         |
| map00500                     | Starch and sucrose metabolism   | 10          | 0.0044         | map00230                    | Purine metabolism                                      | 5           | 0.0228         |
| map01502                     | Vancomycin resistance           | 1           | 0.0210         | map00232                    | Caffeine metabolism                                    | 1           | 0.0375         |
| map00942                     | Anthocyanin biosynthesis        | 1           | 0.0484         |                             |                                                        |             |                |
| map00460                     | Cyanoamino acid metabolism      | 3           | 0.0486         |                             |                                                        |             |                |

**Supplementary Table 21. Sampled tissues and types and data size of transcriptome sequencing for the prediction of gene models.**

| Species               | Sampled tissue                                                                                                                                        | Sequencing type  | Sequencing data (Gb) |
|-----------------------|-------------------------------------------------------------------------------------------------------------------------------------------------------|------------------|----------------------|
| <i>H. hainanensis</i> | Roots, stems, leaves from seedlings; leaves, flowers of 3 different development stages and fruits of 5 different development stages from mature trees | Pacbio Iso-seq   | 46.26                |
|                       | Flowers of 3 different development stages and fruits of 4 different development stages                                                                | Illumina RNA-seq | 63.19                |
| <i>H. reticulata</i>  | Roots, stems, leaves from seedlings                                                                                                                   | Pacbio Iso-seq   | 34.54                |
| <i>H. chinensis</i>   | Leaves from one mature individual                                                                                                                     | Illumina RNA-seq | 6.80                 |
| <i>P. chinensis</i>   | Stems and leaves from one sapling                                                                                                                     | Illumina RNA-seq | 20.76                |
| <i>S. robusta</i>     | Stems and leaves from one mature individual; stems and Leaves from several seedlings                                                                  | Illumina RNA-seq | 42.73                |
| <i>D. turbinatus</i>  | Leaves from one sapling                                                                                                                               | Illumina RNA-seq | 10.62                |
| <i>V. mangachapoi</i> | Stems and leaves from one mature individual                                                                                                           | Illumina RNA-seq | 21.47                |



## References

1. Ashton PS. In *Flora Malesiana* (ed. van Steenis, CGGJ) 237–552 (Martinus Nijhoff, Dordrecht, 1982).
2. Bell CD, Soltis DE, Soltis PS. The age and diversification of the angiosperms re-revisited. *American Journal of Botany* **97**, 1296–1303 (2010).
3. Vega FJ, García-Barrera P, Perrilliat MdC, Coutiño MA, Mariño-Pérez R. El Espinal, a new plattenkalk facies locality from the Lower Cretaceous Sierra Madre Formation, Chiapas, southeastern Mexico. *Revista Mexicana de Ciencias Geológicas* **23**, 323–333 (2006).
4. Bansal M, *et al.* Southeast Asian Dipterocarp origin and diversification driven by Africa-India floristic interchange. *Science* **375**, 455–460 (2022).
5. Ng KKS, *et al.* The genome of *Shorea leprosula* (Dipterocarpaceae) highlights the ecological relevance of drought in aseasonal tropical rainforests. *Communications Biology* **4**, 1166 (2021).
6. Yang YZ, *et al.* Genomic effects of population collapse in a critically endangered ironwood tree *Ostrya rehderiana*. *Nature Communications* **9**, 5449 (2018).
7. Duan NB, *et al.* Genome re-sequencing reveals the history of apple and supports a two-stage model for fruit enlargement. *Nature Communications* **8**, 249 (2017).
8. Huang J, *et al.* The jujube genome provides insights into genome evolution and the domestication of sweetness/acidity taste in fruit trees. *PLoS Genetics* **12**, e1006433 (2016).
9. Salojärvi J, *et al.* Genome sequencing and population genomic analyses provide insights into the adaptive landscape of silver birch. *Nature Genetics* **49**, 904–912 (2017).
10. Verde I, *et al.* The high-quality draft genome of peach (*Prunus persica*) identifies unique patterns of genetic diversity, domestication and genome evolution. *Nature Genetics* **45**, 487–494 (2013).
11. Wang J, Street NR, Scofield DG, Ingvarsson PK. Variation in linked selection and recombination drive genomic divergence during allopatric speciation of European and American aspens. *Molecular Biology and Evolution* **33**, 1754–1767 (2016).
12. Zhao YP, *et al.* Resequencing 545 ginkgo genomes across the world reveals the evolutionary history of the living fossil. *Nature Communications* **10**, 4201 (2019).
13. Tian ZZ, *et al.* Thirteen Dipterocarpoideae genomes provide insights into their evolution and borneol biosynthesis. *Plant Communications* **3**, 100464 (2022).
14. Wang MJ, *et al.* Genomic innovation and regulatory rewiring during evolution of the cotton genus *Gossypium*. *Nature Genetics* **54**, 1959–1971 (2022).
15. Argout X, *et al.* The genome of *Theobroma cacao*. *Nature Genetics* **43**, 101–108 (2011).
16. Goff SA, *et al.* A draft sequence of the rice genome (*Oryza sativa* L. ssp. *japonica*). *Science* **296**, 92–100 (2002).
17. Kaul S, *et al.* Analysis of the genome sequence of the flowering plant *Arabidopsis thaliana*. *Nature* **408**, 796–815 (2000).
18. Ding X, *et al.* Genome sequence of the agarwood tree *Aquilaria sinensis* (Lour.) Spreng: the first chromosome-level draft genome in the Thymelaeaceae family. *GigaScience* **9**, giaa013 (2020).
19. Albert VA, *et al.* The *Amborella* genome and the evolution of flowering plants. *Science* **342**, 1241089 (2013).

20. Sollars ESA, *et al.* Genome sequence and genetic diversity of European ash trees. *Nature* **541**, 212–216 (2017).
21. Mishra B, *et al.* A reference genome of the European beech (*Fagus sylvatica* L.). *GigaScience* **7**, giy063 (2018).
22. Plomion C, *et al.* Oak genome reveals facets of long lifespan. *Nature Plants* **4**, 440–452 (2018).
23. Beck M, Heard W, Mbengue M, Robatzek S. The INs and OUTs of pattern recognition receptors at the cell surface. *Current Opinion in Plant Biology* **15**, 367–374 (2012).
24. Cui HT, Tsuda K, Parker JE. Effector-triggered immunity: from pathogen perception to robust defense. *Annual Review of Plant Biology* **66**, 487–511 (2015).
