# Supplementary material for: Dipterocarpoidae genomics reveal their demography and adaptations to Asian rainforests
Source: PubMed Central journal article supplement (PMC10891123; doi:10.1038/s41467-024-45836-5), 2024-02-23
Supplement: 41467_2024_45836_MOESM4_ESM.pdf [file 41467_2024_45836_MOESM4_ESM.pdf]

**Supplementary Data 1. GO categories for the positively selected genes detected in the genomes of our focal species compared with those of the five temperate tree species.**

| GO ID      | GO term                                                     | N genes | GO ID      | GO term                                           | N genes |
|------------|-------------------------------------------------------------|---------|------------|---------------------------------------------------|---------|
| GO:0006281 | DNA repair                                                  | 3       | GO:0009060 | Aerobic respiration                               | 1       |
| GO:0000724 | Double-strand break repair via homologous recombination     | 1       | GO:2000028 | Regulation of photoperiodism, flowering           | 1       |
| GO:0006289 | Nucleotide-excision repair                                  | 1       | GO:0006662 | Glycerol ether metabolic process                  | 1       |
| GO:0006979 | Response to oxidative stress                                | 3       | GO:0048523 | Negative regulation of cellular process           | 2       |
| GO:0045454 | Cell redox homeostasis                                      | 2       | GO:0019062 | Virion attachment to host cell                    | 2       |
| GO:0019725 | Cellular homeostasis                                        | 3       | GO:0030833 | Regulation of actin filament polymerization       | 1       |
| GO:0009451 | RNA modification                                            | 3       | GO:0051128 | Regulation of cellular component organization     | 2       |
| GO:0006011 | UDP-glucose metabolic process                               | 3       | GO:0016998 | Cell wall macromolecule catabolic process         | 1       |
| GO:0033567 | DNA replication, Okazaki fragment processing                | 1       | GO:0006259 | DNA metabolic process                             | 14      |
| GO:0038032 | Termination of G-protein coupled receptor signaling pathway | 1       | GO:0016049 | Cell growth                                       | 2       |
| GO:0000162 | Tryptophan biosynthetic process                             | 1       | GO:0019835 | Cytolysis                                         | 1       |
| GO:0001522 | Pseudouridine synthesis                                     | 2       | GO:0009617 | Response to bacterium                             | 1       |
| GO:0006631 | Fatty acid metabolic process                                | 4       | GO:0001503 | Ossification                                      | 1       |
| GO:0045132 | Meiotic chromosome segregation                              | 1       | GO:0007010 | Cytoskeleton organization                         | 4       |
| GO:0008616 | Queuosine biosynthetic process                              | 1       | GO:0030100 | Regulation of endocytosis                         | 1       |
| GO:0006438 | Valyl-tRNA aminoacylation                                   | 1       | GO:0071822 | Protein complex subunit organization              | 7       |
| GO:0009405 | Pathogenesis                                                | 10      | GO:0006002 | Fructose 6-phosphate metabolic process            | 1       |
| GO:0051704 | Multi-organism process                                      | 13      | GO:0007194 | Negative regulation of adenylate cyclase activity | 1       |
| GO:0000280 | Nuclear division                                            | 2       | GO:0006265 | DNA topological change                            | 4       |

|            |                                                    |   |            |                                                               |    |
|------------|----------------------------------------------------|---|------------|---------------------------------------------------------------|----|
| GO:0022402 | Cell cycle process                                 | 4 | GO:0006399 | tRNA metabolic process                                        | 2  |
| GO:0000003 | Reproduction                                       | 2 | GO:0006996 | Organelle organization                                        | 9  |
| GO:0006584 | Catecholamine metabolic process                    | 1 | GO:0016539 | Intein-mediated protein splicing                              | 3  |
| GO:0006788 | Heme oxidation                                     | 1 | GO:0044710 | Single-organism metabolic process                             | 39 |
| GO:1901615 | Organic hydroxy compound metabolic process         | 2 | GO:0055114 | Oxidation-reduction process                                   | 20 |
| GO:0032787 | Monocarboxylic acid metabolic process              | 6 | GO:0006461 | Protein complex assembly                                      | 6  |
| GO:0006691 | Leukotriene metabolic process                      | 1 | GO:0044780 | Bacterial-type flagellum assembly                             | 1  |
| GO:2000026 | Regulation of multicellular organismal development | 2 | GO:0046394 | Carboxylic acid biosynthetic process                          | 3  |
| GO:0006275 | Regulation of DNA replication                      | 1 | GO:0044281 | Small molecule metabolic process                              | 16 |
| GO:0044255 | Cellular lipid metabolic process                   | 5 | GO:0007275 | Multicellular organismal development                          | 3  |
| GO:0032940 | Secretion by cell                                  | 4 | GO:0015886 | Heme transport                                                | 1  |
| GO:0016525 | Negative regulation of angiogenesis                | 1 | GO:0090066 | Regulation of anatomical structure size                       | 3  |
| GO:0007342 | Fusion of sperm to egg plasma membrane             | 1 | GO:0017004 | Cytochrome complex assembly                                   | 1  |
| GO:0008154 | Actin polymerization or depolymerization           | 2 | GO:0016043 | Cellular component organization                               | 12 |
| GO:0006396 | RNA processing                                     | 4 | GO:0016055 | Wnt signaling pathway                                         | 1  |
| GO:0009306 | Protein secretion                                  | 3 | GO:0009401 | Phosphoenolpyruvate-dependent sugar phosphotransferase system | 1  |
| GO:0006904 | Vesicle docking involved in exocytosis             | 1 | GO:0006091 | Generation of precursor metabolites and energy                | 4  |
| GO:0030042 | Actin filament depolymerization                    | 1 | GO:0070493 | Thrombin receptor signaling pathway                           | 1  |
| GO:0001505 | Regulation of neurotransmitter levels              | 2 | GO:0015672 | Monovalent inorganic cation transport                         | 13 |
| GO:0032259 | Methylation                                        | 2 | GO:0006352 | DNA-templated transcription, initiation                       | 1  |
| GO:0016180 | snRNA processing                                   | 1 | GO:0006470 | Protein dephosphorylation                                     | 1  |
| GO:0034470 | ncRNA processing                                   | 2 | GO:0006915 | Apoptotic process                                             | 1  |
| GO:0006629 | Lipid metabolic process                            | 7 | GO:0005975 | Carbohydrate metabolic process                                | 10 |
| GO:0006457 | Protein folding                                    | 3 | GO:0015031 | Protein transport                                             | 5  |

|            |                                                |    |            |                                                            |    |
|------------|------------------------------------------------|----|------------|------------------------------------------------------------|----|
| GO:0048519 | Negative regulation of biological process      | 3  | GO:0030001 | Metal ion transport                                        | 16 |
| GO:0055117 | Regulation of cardiac muscle contraction       | 1  | GO:0022607 | Cellular component assembly                                | 7  |
| GO:0051225 | Spindle assembly                               | 2  | GO:0044262 | Cellular carbohydrate metabolic process                    | 2  |
| GO:0007067 | Mitotic nuclear division                       | 1  | GO:0043623 | Cellular protein complex assembly                          | 2  |
| GO:0070925 | Organelle assembly                             | 3  | GO:0048583 | Regulation of response to stimulus                         | 2  |
| GO:0051297 | Centrosome organization                        | 2  | GO:0019752 | Carboxylic acid metabolic process                          | 9  |
| GO:0051239 | Regulation of multicellular organismal process | 4  | GO:0006096 | Glycolytic process                                         | 2  |
| GO:0006260 | DNA replication                                | 4  | GO:0016192 | Vesicle-mediated transport                                 | 2  |
| GO:0005978 | Glycogen biosynthetic process                  | 1  | GO:0070588 | Calcium ion transmembrane transport                        | 2  |
| GO:0019229 | Regulation of vasoconstriction                 | 2  | GO:0034622 | Cellular macromolecular complex assembly                   | 4  |
| GO:0006813 | Potassium ion transport                        | 12 | GO:0051649 | Establishment of localization in cell                      | 5  |
| GO:0006633 | Fatty acid biosynthetic process                | 2  | GO:0055086 | Nucleobase-containing small molecule metabolic process     | 5  |
| GO:0022414 | Reproductive process                           | 2  | GO:0071103 | DNA conformation change                                    | 6  |
| GO:0042119 | Neutrophil activation                          | 1  | GO:0044711 | Single-organism biosynthetic process                       | 7  |
| GO:0006306 | DNA methylation                                | 1  | GO:0065008 | Regulation of biological quality                           | 10 |
| GO:0007217 | Tachykinin receptor signaling pathway          | 1  | GO:0006812 | Cation transport                                           | 17 |
| GO:0015979 | Photosynthesis                                 | 2  | GO:0006811 | Ion transport                                              | 23 |
| GO:0008610 | Lipid biosynthetic process                     | 3  | GO:0044763 | Single-organism cellular process                           | 71 |
| GO:0034660 | ncRNA metabolic process                        | 3  | GO:1901135 | Carbohydrate derivative metabolic process                  | 6  |
| GO:0006066 | Alcohol metabolic process                      | 1  | GO:0007204 | Positive regulation of cytosolic calcium ion concentration | 1  |
| GO:0008299 | Isoprenoid biosynthetic process                | 1  | GO:0048731 | System development                                         | 2  |
| GO:1902589 | Single-organism organelle organization         | 5  | GO:0015980 | Energy derivation by oxidation of organic compounds        | 2  |
| GO:0006836 | Neurotransmitter transport                     | 1  |            |                                                            |    |

---
