# Supplementary material for: Dipterocarpoidae genomics reveal their demography and adaptations to Asian rainforests
Source: PubMed Central journal article supplement (PMC10891123; doi:10.1038/s41467-024-45836-5), 2024-02-23
Supplement: 41467_2024_45836_MOESM5_ESM.pdf [file 41467_2024_45836_MOESM5_ESM.pdf]

**Supplementary Data 2. The positively selected genes supported by the comparisons with temperate trees.** The gene IDs of positively selected genes are the gene IDs of the orthologs in *H. chinensis* genome. The positively selected genes associated with plants' adaptation to environmental stresses were identified by checking the published literatures, and thus their functional categories, potentially associated stress and related references were listed. NA: not available.

| GENE_ID               | Encoded protein                                                   | KEGG pathway /GO term                                      | Functional category       | Associated stress                   | Reference |
|-----------------------|-------------------------------------------------------------------|------------------------------------------------------------|---------------------------|-------------------------------------|-----------|
| evm.model.000008F.338 | DNA repair protein RAD51 homolog 4 (RAD51D)                       | map03440 Homologous recombination                          | DNA repair                | UV adaptation                       | 1         |
| evm.model.000183F.61  | Structural maintenance of chromosomes protein 5 (SMC5)            | GO:0006281 DNA repair                                      | DNA repair                | UV adaptation                       | 2         |
| evm.model.000264F.14  | Carotenoid $\epsilon$ -hydroxylase (LUT1)                         | map00906 Carotenoid biosynthesis                           | DNA repair                | Drought tolerance                   | 3         |
| evm.model.000060F.10  | DNA replication ATP-dependent helicase Dna2 (DNA2)                | map03030 DNA replication                                   | DNA repair                | Drought tolerance<br>Salt tolerance | 4         |
| evm.model.000223F.16  | 3'(2'), 5'-bisphosphate nucleotidase (cysQ)                       | map00920 Sulfur metabolism                                 | DNA repair                | Drought tolerance                   | 5         |
| evm.model.000026F.212 | Bloom syndrome protein (BLM)                                      | map03440 Homologous recombination<br>GO:0006281 DNA repair | DNA repair                | UV adaptation                       | 1         |
| evm.model.000196F.15  | Leucine-rich PPR motif-containing protein, mitochondrial (LRPPRC) | GO:0006281 DNA repair                                      | DNA repair                | UV adaptation                       | 2         |
| evm.model.000015F.398 | Lysine-specific histone demethylase 1A (LSD1)                     |                                                            | DNA repair                | UV adaptation                       | 6         |
| evm.model.000014F.58  | Serine/Threonine-protein kinase SMG1 (SMG1)                       | map03015 mRNA surveillance pathway                         | Abnormal mRNA degradation | Drought tolerance                   | 7         |

|                         |                                                                        |                                                                             |                                                             |                                                                             |    |
|-------------------------|------------------------------------------------------------------------|-----------------------------------------------------------------------------|-------------------------------------------------------------|-----------------------------------------------------------------------------|----|
| evm.model.000015F.420.3 | Serine/threonine-protein phosphatase 2A regulatory subunit B' (PPP2R5) | map03015 mRNA surveillance pathway                                          | Abnormal mRNA degradation                                   | Heat tolerance                                                              | 8  |
| evm.model.000293F.15.5  | Superkiller protein 3 (SKI3)                                           | map03018 RNA degradation                                                    | Abnormal mRNA degradation                                   | Drought tolerance                                                           | 9  |
| evm.model.000260F.28    | Riboflavin kinase (RFK)                                                | map00740 Riboflavin metabolism                                              | Antioxidation                                               | Drought tolerance                                                           | 10 |
| evm.model.000088F.155   | L-ascorbate peroxidase (APX)                                           | map00053 Ascorbate and aldarate metabolism                                  | Antioxidation                                               | Heat tolerance<br>Flooding tolerance<br>Salt tolerance<br>Drought tolerance | 11 |
| evm.model.000258F.15    | Xanthine dehydrogenase/oxidase (XDH)                                   | map00232 Caffeine metabolism<br>map00230 Purine metabolism                  | Antioxidation                                               | UV adaptation                                                               | 12 |
| evm.model.000081F.77.3  | Geranyl diphosphate synthase (GPS)                                     | map00900 Terpenoid backbone biosynthesis                                    | Antioxidation                                               | UV adaptation                                                               | 13 |
| evm.model.000015F.76    | UDP-sugar pyrophosphorylase (USP)                                      | map00052 Galactose metabolism<br>map00053 Ascorbate and aldarate metabolism | Antioxidation                                               | Drought tolerance<br>Heat tolerance<br>Salt tolerance                       | 14 |
| evm.model.000089F.29    | Alcohol dehydrogenase (ADH)                                            | map00071 Fatty acid degradation                                             | Anaerobic respiration enhancement                           | Flooding tolerance                                                          | 15 |
| evm.model.000190F.19    | Peptide-N4-(N-acetyl-beta-glucosaminyl)asparagine amidase (NGLY1)      | map04141 Protein processing in endoplasmic reticulum                        | ERAD (Endoplasmic Reticulum Associated Degradation) pathway | Heat tolerance                                                              | 16 |

|                       |                                                         |                                                                    |                             |                   |    |
|-----------------------|---------------------------------------------------------|--------------------------------------------------------------------|-----------------------------|-------------------|----|
| evm.model.000059F.36  | Neomenthol dehydrogenase (NDH)                          | map00902 Monoterpenoid biosynthesis                                | Pathogen resistance         | Drought tolerance | 17 |
| evm.model.000072F.45  | Molecular chaperone GrpE (GRPE)                         |                                                                    | Cellular energy homeostasis | Heat tolerance    | 18 |
| evm.model.000237F.34  | Glucan endo-1,3-beta-glucosidase 4 (GN4)                | map00500 Starch and sucrose metabolism                             |                             |                   |    |
| evm.model.000090F.132 | Endoglucanase                                           | map00500 Starch and sucrose metabolism                             |                             |                   |    |
| evm.model.000007F.357 | Glucan endo-1,3-beta-glucosidase 1/2/3                  | map00500 Starch and sucrose metabolism                             |                             |                   |    |
| evm.model.000022F.77  | U5 snRNP protein, DIM1 family                           | map03040 Spliceosome                                               |                             |                   |    |
| evm.model.000087F.26  | Crooked neck (CRN)                                      | map03040 Spliceosome                                               |                             |                   |    |
| evm.model.000014F.222 | 3-Hydroxybutyryl-CoA dehydrogenase                      | map00360 Phenylalanine metabolism<br>map00650 Butanoate metabolism |                             |                   |    |
| evm.model.000002F.161 | Fatty acid omega-hydroxylase                            | map00073 Cutin, suberine and wax biosynthesis                      |                             |                   |    |
| evm.model.000172F.35  | U3 small nucleolar RNA-associated protein MPP10 (MPP10) | map03008 Ribosome biogenesis in eukaryotes                         |                             |                   |    |
| evm.model.000081F.131 | Acyl-activating enzyme 14 (AAE14)                       | map00130 Ubiquinone and other terpenoid-quinone biosynthesis       |                             |                   |    |
| evm.model.000094F.123 | NAD(P)H dehydrogenase (quinone) (wrbA)                  | map00130 Ubiquinone and other terpenoid-quinone biosynthesis       |                             |                   |    |
| evm.model.000013F.165 | SEL1 protein (SEL1)                                     | map04141 Protein processing in endoplasmic reticulum               |                             |                   |    |
| evm.model.000173F.72  | Palmitoyl-protein thioesterase (PPT)                    | map00062 Fatty acid elongation                                     |                             |                   |    |

|                        |                                                                                               |                                                                                                           |
|------------------------|-----------------------------------------------------------------------------------------------|-----------------------------------------------------------------------------------------------------------|
| evm.model.000045F.23   | Monolysocardiolipin<br>acyltransferase                                                        | map00564 Glycerophospholipid<br>metabolism                                                                |
| evm.model.000024F.309  | Uracil phosphoribosyltransferase                                                              | map00240 Pyrimidine metabolism                                                                            |
| evm.model.000254F.36   | ATP-binding cassette, subfamily G<br>(WHITE), member 2                                        | map02010 ABC transporters                                                                                 |
| evm.model.000107F.89.2 | 2-Dehydro-3-<br>deoxyphosphogluconate aldolase /<br>(4S)-4-hydroxy-2-oxoglutarate<br>aldolase | map00630 Glyoxylate and dicarboxylate<br>metabolism                                                       |
| evm.model.000008F.209  | Enolase                                                                                       | map01230 Biosynthesis of amino acids<br>map00010 Glycolysis / Gluconeogenesis<br>map03018 RNA degradation |
| evm.model.000148F.47   | 5'-Nucleotidase                                                                               | map00760 Nicotinate and nicotinamide<br>metabolism                                                        |
| evm.model.000042F.132  | Derlin-2/3                                                                                    | map00240 Pyrimidine metabolism<br>map04141 Protein processing in<br>endoplasmic reticulum                 |
| evm.model.000012F.28   | Phospholipase D3/4                                                                            | map00565 Ether lipid metabolism<br>map00564 Glycerophospholipid<br>metabolism                             |
| evm.model.000244F.55   | photosystem I subunit III                                                                     | map00195 Photosynthesis                                                                                   |
| evm.model.000019F.19   | Aminoacylase                                                                                  | map00220 Arginine biosynthesis<br>map01230 Biosynthesis of amino acids                                    |
| evm.model.000003F.372  | Tryptophan synthase beta chain                                                                | map00400 Phenylalanine, tyrosine and<br>tryptophan biosynthesis<br>map01230 Biosynthesis of amino acids   |

|                        |                                                             |                                               |
|------------------------|-------------------------------------------------------------|-----------------------------------------------|
| evm.model.000186F.18   | Monolysocardiolipin acyltransferase                         | map00564 Glycerophospholipid metabolism       |
| evm.model.000081F.76.1 | 26S proteasome regulatory subunit T4                        | map03050 Proteasome                           |
| evm.model.000294F.13   | Thiamine pyrophosphokinase                                  | map00730 Thiamine metabolism                  |
| evm.model.000049F.44   | DNA excision repair protein ERCC-4                          | map03420 Nucleotide excision repair           |
| evm.model.000125F.114  | Heme oxygenase (biliverdin-producing) (HMOX1)               | map00860 Porphyrin and chlorophyll metabolism |
| evm.model.000060F.241  | BRCA1-A complex subunit BRE (BRE)                           | NA                                            |
| evm.model.000001F.21   | Histone deacetylase 10 (HDAC10)                             | NA                                            |
| evm.model.000141F.13   | PAX-interacting protein 1 (PAXIP1)                          | NA                                            |
| evm.model.000119F.12   | Disease resistance protein RPM1 (RPM1)                      | NA                                            |
| evm.model.000048F.9    | F-box protein GID2                                          | NA                                            |
| evm.model.000016F.397  | Integrator complex subunit 9                                | NA                                            |
| evm.model.000070F.185  | Magnesium/proton exchanger                                  | NA                                            |
| evm.model.000116F.31   | Rab3 GTPase-activating protein catalytic subunit (RAB3GAP1) | NA                                            |
| evm.model.000008F.314  | 4-nitrophenyl phosphatase                                   | NA                                            |
| evm.model.000137F.78   | Cyclin D5, plant (CYCD5)                                    | NA                                            |
| evm.model.000020F.115  | FK506-binding nuclear protein (FPR3_4)                      | NA                                            |

|                         |                                                                             |    |
|-------------------------|-----------------------------------------------------------------------------|----|
| evm.model.000264F.25    | Peptidylprolyl isomerase                                                    | NA |
| evm.model.000084F.131   | ATP-dependent DNA helicase<br>HFM1/MER3                                     | NA |
| evm.model.000264F.21    | DnaJ homolog subfamily C<br>member 28                                       | NA |
| evm.model.000118F.96    | ATP-dependent RNA helicase<br>DDX43 (DDX43)                                 | NA |
| evm.model.000108F.43    | Palmitoyltransferase<br>ZDHHC2/15/20 (ZDHHC2_15_20)                         | NA |
| evm.model.000185F.65    | Gamma-<br>glutamylaminocyclotransferase<br>(GGACT)                          | NA |
| evm.model.000015F.73    | Cohesin complex subunit SCC1<br>(SCC1)                                      | NA |
| evm.model.000010F.29    | Aminoacyl tRNA synthase<br>complex-interacting multifunctional<br>protein 1 | NA |
| evm.model.000038F.139   | Leucine-rich PPR motif-containing<br>protein, mitochondrial (LRPPRC)        | NA |
| evm.model.000075F.43    | Sterol 3beta-glucosyltransferase                                            | NA |
| evm.model.000030F.147.1 | Pre-mRNA-processing factor 39                                               | NA |
| evm.model.000075F.98    | Proteasome assembly chaperone 2                                             | NA |
| evm.model.000003F.141   | Queuine tRNA-ribosyltransferase<br>accessory subunit (QTRT2)                | NA |
| evm.model.000154F.6     | Protein N-terminal asparagine<br>amidohydrolase                             | NA |

|                        |                                                      |    |
|------------------------|------------------------------------------------------|----|
| evm.model.000118F.87   | ATP-dependent NAD(P)H-hydrate dehydratase            | NA |
| evm.model.000003F.336  | GINS complex subunit 4 (GINS4)                       | NA |
| evm.model.000055F.138  | E3 ubiquitin-protein ligase Topors                   | NA |
| evm.model.000049F.127  | ATP-dependent RNA helicase DDX59                     | NA |
| evm.model.000132F.39   | Pentatricopeptide repeat domain-containing protein 1 | NA |
| evm.model.000091F.131  | Endothelin-converting enzyme (ECE)                   | NA |
| evm.model.000194F.53   | Interleukin-1 receptor-associated kinase 1           | NA |
| evm.model.000179F.13   | Uncharacterized protein                              | NA |
| evm.model.000188F.46   | Chromosome transmission fidelity protein 8           | NA |
| evm.model.000022F.124  | Myotubularin-related protein 5/13                    | NA |
| evm.model.000120F.84   | Urease accessory protein                             | NA |
| evm.model.000276F.21   | Tatd dnase family protein                            | NA |
| evm.model.000221F.68   | Endophilin-a                                         | NA |
| evm.model.000102F.42   | Monothiol glutaredoxin                               | NA |
| evm.model.000141F.89_e | Histone-binding protein rbbp4                        | NA |
| vm.model.000141F.90    |                                                      |    |
| evm.model.000410F.6    | Calcium-binding protein cml                          | NA |
| evm.model.000122F.63   | Rna-binding protein fus                              | NA |
| evm.model.000015F.363  | Sperm-associated antigen 1                           | NA |

|                        |                                                                 |    |
|------------------------|-----------------------------------------------------------------|----|
| evm.model.000267F.31   | Solute carrier family 25, member 44                             | NA |
| evm.model.000125F.121  | Acylaminoacyl-peptidase                                         | NA |
| evm.model.000196F.4    | Leucine-rich ppr motif-containing protein, mitochondrial        | NA |
| evm.model.000022F.104  | Tetraspanin-5                                                   | NA |
| evm.model.000200F.10   | Thioredoxin 1                                                   | NA |
| evm.model.000003F.254  | Atp-dependent clp protease, protease subunit                    | NA |
| evm.model.000063F.79   | Uncharacterized protein                                         | NA |
| evm.model.000172F.60   | Rna-binding protein 5/10                                        | NA |
| evm.model.000062F.6    | Aarf domain-containing kinase                                   | NA |
| evm.model.000277F.51   | Inhibitor of nuclear factor kappa-b kinase subunit alpha        | NA |
| evm.model.000194F.81   | Protein phosphatase                                             | NA |
| evm.model.000102F.73   | Hiv tat-specific factor 1                                       | NA |
| evm.model.000044F.132  | Uncharacterized protein                                         | NA |
| evm.model.000049F.87.1 | Putative mfs transporter, agza family, xanthine/uracil permease | NA |
| evm.model.000041F.137  | Transcription elongation factor s-ii                            | NA |
| evm.model.000306F.17   | Uncharacterized protein                                         | NA |
| evm.model.000170F.79   | Nadh dehydrogenase (ubiquinone) 1 alpha/beta subcomplex 1       | NA |
| evm.model.000100F.101_ | General transcription factor 3c                                 | NA |
| evm.model.000100F.102  | polypeptide 5 (transcription factor c subunit 1)                |    |



|                       |                                                                        |    |
|-----------------------|------------------------------------------------------------------------|----|
| evm.model.000013F.88  | Regulator of g-protein signaling                                       | NA |
| evm.model.000016F.414 | Pentatricopeptide repeat domain-containing protein 1                   | NA |
| evm.model.000212F.8   | Selenium-binding protein 1                                             | NA |
| evm.model.000282F.12  | Elongator complex protein 3                                            | NA |
| evm.model.000453F.9   | Solute carrier family 32 (vesicular inhibitory amino acid transporter) | NA |
| evm.model.000015F.451 | U3 small nucleolar rna-associated protein 7                            | NA |
| evm.model.000101F.17  | General transcription factor 3c polypeptide 4                          | NA |
| evm.model.000166F.93  | Nephrocystin-3                                                         | NA |
| evm.model.000022F.226 | Atp-binding protein involved in chromosome partitioning                | NA |
| evm.model.000067F.166 | Saga-associated factor 29                                              | NA |
| evm.model.000081F.119 | Release factor glutamine methyltransferase                             | NA |
| evm.model.000317F.9   | Peroxidase                                                             | NA |
| evm.model.000016F.344 | Eri1 exoribonuclease 2                                                 | NA |
| evm.model.000173F.38  | Taspase, threonine aspartase, 1                                        | NA |
| evm.model.000152F.40  | 5'-amp-activated protein kinase, regulatory gamma subunit              | NA |
| evm.model.000023F.72  | Syntaxin-binding protein 5                                             | NA |
| evm.model.000195F.42  | Nadh dehydrogenase                                                     | NA |
| evm.model.000006F.4   | Tubby-related protein 1                                                | NA |

|                        |                                             |    |
|------------------------|---------------------------------------------|----|
| evm.model.000018F.66.1 | Trna wybutosine-synthesizing<br>protein 3   | NA |
| evm.model.000016F.232  | Uncharacterized protein                     | NA |
| evm.model.000006F.162  | Trna pseudouridine38-40 synthase            | NA |
| evm.model.000003F.62   | Trna pseudouridine38-40 synthase            | NA |
| evm.model.000120F.33   | Tubulin--tyrosine ligase-like<br>protein 12 | NA |
| evm.model.000072F.57   | Tata-binding protein-associated<br>factor   | NA |
| evm.model.000054F.39   | NA                                          | NA |
| evm.model.000068F.63   | NA                                          | NA |
| evm.model.000254F.45   | NA                                          | NA |
| evm.model.000012F.309  | NA                                          | NA |
| evm.model.000172F.29   | NA                                          | NA |
| evm.model.000072F.54.1 | NA                                          | NA |
| evm.model.000079F.88   | NA                                          | NA |
| evm.model.000095F.60   | NA                                          | NA |
| evm.model.000026F.310  | NA                                          | NA |
| evm.model.000145F.20   | NA                                          | NA |
| evm.model.000023F.11   | NA                                          | NA |
| evm.model.000216F.21   | NA                                          | NA |
| evm.model.000160F.69   | NA                                          | NA |
| evm.model.000168F.125  | NA                                          | NA |
| evm.model.000151F.59   | NA                                          | NA |
| evm.model.000152F.10   | NA                                          | NA |
| evm.model.000065F.121  | NA                                          | NA |

|                        |    |    |
|------------------------|----|----|
| evm.model.000145F.26   | NA | NA |
| evm.model.000108F.158  | NA | NA |
| evm.model.000045F.102  | NA | NA |
| evm.model.000016F.456  | NA | NA |
| evm.model.000067F.36   | NA | NA |
| evm.model.000057F.74   | NA | NA |
| evm.model.000081F.41_e | NA | NA |
| vm.model.000081F.42    |    |    |
| evm.model.000216F.51   | NA | NA |
| evm.model.000013F.125  | NA | NA |
| evm.model.000145F.82   | NA | NA |
| evm.model.000092F.63   | NA | NA |
| evm.model.000237F.46   | NA | NA |
| evm.model.000595F.4    | NA | NA |
| evm.model.000199F.67.1 | NA | NA |
| evm.model.000013F.288  | NA | NA |
| evm.model.000333F.19   | NA | NA |
| evm.model.000021F.88   | NA | NA |
| evm.model.000016F.255  | NA | NA |
| evm.model.000154F.95   | NA | NA |
| evm.model.000277F.29   | NA | NA |
| evm.model.000015F.62.1 | NA | NA |
| evm.model.000255F.12   | NA | NA |
| evm.model.000282F.27   | NA | NA |
| evm.model.000042F.14   | NA | NA |
| evm.model.000081F.52   | NA | NA |

|                        |    |    |
|------------------------|----|----|
| evm.model.000040F.126  | NA | NA |
| evm.model.000411F.8.1  | NA | NA |
| evm.model.000016F.338  | NA | NA |
| evm.model.000105F.10.1 | NA | NA |
| evm.model.000035F.53   | NA | NA |
| evm.model.000026F.186  | NA | NA |
| evm.model.000030F.146  | NA | NA |
| evm.model.000141F.63   | NA | NA |
| evm.model.000033F.81   | NA | NA |
| evm.model.000333F.14   | NA | NA |
| evm.model.000173F.100  | NA | NA |
| evm.model.000233F.35.1 | NA | NA |
| evm.model.000083F.74   | NA | NA |
| evm.model.000069F.65   | NA | NA |
| evm.model.000106F.116  | NA | NA |
| evm.model.000224F.74   | NA | NA |
| evm.model.000010F.124  | NA | NA |

---

## References

1. Vallerga MB, Mansilla SF, Federico MB, Bertolin AP, Gottifredi V. Rad51 recombinase prevents Mre11 nuclease-dependent degradation and excessive PrimPol-mediated elongation of nascent DNA after UV irradiation. *Proceedings of the National Academy of Sciences* **112**, e6624–e6633 (2015).
2. Maria SRS, Gangavarapu V, Johnson RE, Prakash L, Prakash S. Requirement of Nse1, a subunit of the Smc5-Smc6 complex, for Rad52-dependent postreplication repair of UV-Damaged DNA in *Saccharomyces cerevisiae*. *Molecular and Cellular Biology* **27**, 8409–8418 (2007).
3. Wang SJ, Zhuang KY, Zhang S, Yang MM, Kong FY, Meng QW. Overexpression of a tomato carotenoid  $\epsilon$ -hydroxylase gene (*SILUTI*) improved the drought tolerance of transgenic tobacco. *Journal of Plant Physiology* **222**, 103–112 (2018).
4. Saleem B, *et al.* Genome-wide and molecular characterization of the DNA replication helicase 2 (*DNA2*) gene family in rice under drought and salt stress. *Frontiers in Genetics* **13**, 1039548 (2022).
5. Abdallah NA, Elsharawy H, Abulela HA, Thilmony R, Abdelhadi AA, Elarabi NI. Multiplex CRISPR/Cas9-mediated genome editing to address drought tolerance in wheat. *GM Crops & Food*, 1–17 (2022).
6. Hirakawa T, *et al.* LSD1-LIKE1-mediated H3K4me2 demethylation is required for homologous recombination repair. *Plant Physiology* **181**, 499–509 (2019).
7. Lloyd JPB, Lang D, Zimmer AD, Causier B, Reski R, Davies B. The loss of SMG1 causes defects in quality control pathways in *Physcomitrella patens*. *Nucleic Acids Research* **46**, 5822–5836 (2018).
8. Wang C, *et al.* Comparative proteomic and phosphoproteomic analysis reveals differential heat response mechanism in two congeneric oyster species. *Ecotoxicology and Environmental Safety* **263**, 115197 (2023).
9. Daszkowska-Golec A, Karcz J, Plociniczak T, Sitko K, Szarejko I. Cuticular waxes—a shield of barley mutant in *CBP20* (*Cap-Binding Protein 20*) gene when struggling with drought stress. *Plant Science (Limerick)* **300**, 110593 (2020).
10. Guhr A, Horn MA, Weig AR. Vitamin B(2) (riboflavin) increases drought tolerance of *Agaricus bisporus*. *Mycologia* **109**, 860–873 (2017).
11. Venkatesh J, Park SW. Role of L-ascorbate in alleviating abiotic stresses in crop plants. *Botanical Studies* **55**, 38 (2014).
12. Soltabayeva A, *et al.* Ureides are accumulated similarly in response to UV-C irradiation and wounding in *Arabidopsis* leaves but are remobilized differently during recovery. *Journal of Experimental Botany* **73**, 1016–1032 (2022).
13. Xie YJ, Xu DK, Cui WT, Shen WB. Mutation of *Arabidopsis HYL* causes UV-C hypersensitivity by impairing carotenoid and flavonoid biosynthesis and the down-regulation of antioxidant defence. *Journal of Experimental Botany* **63**, 3869–3883 (2012).
14. Gou LM, Zhuo CL, Lu SY, Guo ZF. A Universal Stress Protein from *Medicago falcata* (*MfUSP1*) confers multiple stress tolerance by regulating antioxidant defense and proline accumulation. *Environmental and Experimental Botany* **178**, 104168 (2020).
15. Komatsu S, *et al.* Characterization of a novel flooding stress-responsive alcohol dehydrogenase

- expressed in soybean roots. *Plant Molecular Biology* **77**, 309–322 (2011).
16. Bracher A, Verghese J. The nucleotide exchange factors of Hsp70 molecular chaperones. *Frontiers in Molecular Biosciences* **2**, 10 (2015).
  17. Abdeen A, Schnell J, Miki B. Transcriptome analysis reveals absence of unintended effects in drought-tolerant transgenic plants overexpressing the transcription factor *ABF3*. *BMC Genomics* **11**, 69 (2010).
  18. Su PH, Lin HY, Lai YH. Two Arabidopsis chloroplast GrpE homologues exhibit distinct biological activities and can form homo-and hetero-oligomers. *Frontiers in Plant Science* **10**, 1719 (2020).
